# Supplementary material for: Development of allogeneic HSC-engineered iNKT cells for off-the-shelf cancer immunotherapy
Source: PubMed Central journal article supplement (PMC8607011; doi:10.1016/j.xcrm.2021.100449), 2021-11-16
Supplement: mmc2.pdf [file mmc2.pdf]

# Development of allogeneic HSC-engineered iNKT cells for off-the-shelf cancer immunotherapy

## Graphical abstract

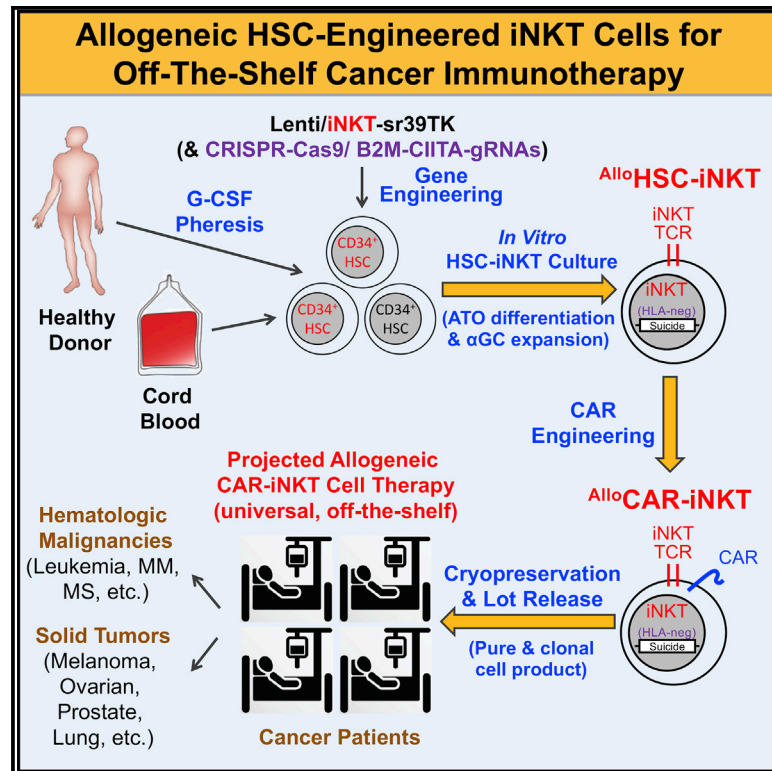

## Authors

Yan-Ruide Li, Yang Zhou, Yu Jeong Kim, ..., Owen Witte, Pin Wang, Lili Yang

## Correspondence

liliyang@ucla.edu

## In brief

Li et al. report the preclinical development of allogeneic-hematopoietic-stem-cell-engineered invariant natural killer T (HSC-iNKT) cells for off-the-shelf cancer therapy. Allogeneic HSC-iNKT cells demonstrate cancer therapy potential and a high safety profile.

## Highlights

- Allogeneic HSC-iNKT cells are generated *in vitro* at high yield and purity
- Allogeneic HSC-iNKT cells effectively target tumor cells using multiple mechanisms
- Allogeneic HSC-iNKT cells exhibit high safety and low immunogenicity
- A preclinical study demonstrated feasibility, safety, and cancer therapy potential

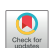

## Article

# Development of allogeneic HSC-engineered iNKT cells for off-the-shelf cancer immunotherapy

Yan-Ruide Li,<sup>1,14</sup> Yang Zhou,<sup>1,14</sup> Yu Jeong Kim,<sup>1</sup> Yanni Zhu,<sup>1</sup> Feiyang Ma,<sup>2</sup> Jiaji Yu,<sup>1</sup> Yu-Chen Wang,<sup>1</sup> Xianhui Chen,<sup>3</sup> Zhe Li,<sup>1</sup> Samuel Zeng,<sup>1</sup> Xi Wang,<sup>1</sup> Derek Lee,<sup>1</sup> Josh Ku,<sup>1</sup> Tasha Tsao,<sup>1</sup> Christian Hardoy,<sup>1</sup> Jie Huang,<sup>1</sup> Donghui Cheng,<sup>4</sup> Amélie Montel-Hagen,<sup>6</sup> Christopher S. Seet,<sup>4,5,7</sup> Gay M. Crooks,<sup>4,6,7,8</sup> Sarah M. Larson,<sup>9</sup> Joshua P. Sasine,<sup>4,7,10</sup> Xiaoyan Wang,<sup>5</sup> Matteo Pellegrini,<sup>2,4</sup> Antoni Ribas,<sup>4,7,11,12</sup> Donald B. Kohn,<sup>1,4,10</sup> Owen Witte,<sup>1,4,7,12,13</sup> Pin Wang,<sup>3</sup> and Lili Yang<sup>1,4,7,13,15,\*</sup>

<sup>1</sup>Department of Microbiology, Immunology & Molecular Genetics, University of California, Los Angeles, Los Angeles, CA 90095, USA

<sup>2</sup>Department of Molecular, Cell and Developmental Biology, College of Letters and Sciences, University of California, Los Angeles, Los Angeles, CA 90095, USA

<sup>3</sup>Department of Pharmacology and Pharmaceutical Sciences, University of Southern California, Los Angeles, CA 90089, USA

<sup>4</sup>Eli and Edythe Broad Center of Regenerative Medicine and Stem Cell Research, University of California, Los Angeles, Los Angeles, CA 90095, USA

<sup>5</sup>Department of Medicine, University of California, Los Angeles, Los Angeles, CA 90095, USA

<sup>6</sup>Department of Pathology and Laboratory Medicine, University of California, Los Angeles, Los Angeles, CA 90095, USA

<sup>7</sup>Jonsson Comprehensive Cancer Center, David Geffen School of Medicine, University of California, Los Angeles, Los Angeles, CA 90095, USA

<sup>8</sup>Department of Pediatrics, University of California, Los Angeles, Los Angeles, CA 90095, USA

<sup>9</sup>Department of Internal Medicine, University of California, Los Angeles, Los Angeles, CA 90095, USA

<sup>10</sup>Division of Hematology/Oncology, Department of Pediatrics, David Geffen School of Medicine, University of California, Los Angeles, Los Angeles, CA 90095, USA

<sup>11</sup>Department of Molecular and Medical Pharmacology, University of California, Los Angeles, Los Angeles, CA 90095, USA

<sup>12</sup>Parker Institute for Cancer Immunotherapy, University of California, Los Angeles, Los Angeles, CA 90095, USA

<sup>13</sup>Molecular Biology Institute, University of California, Los Angeles, Los Angeles, CA 90095, USA

<sup>14</sup>These authors contributed equally

<sup>15</sup>Lead contact

\*Correspondence: [liliyang@ucla.edu](mailto:liliyang@ucla.edu)

<https://doi.org/10.1016/j.xcrm.2021.100449>

## SUMMARY

Cell-based immunotherapy has become the new-generation cancer medicine, and “off-the-shelf” cell products that can be manufactured at large scale and distributed readily to treat patients are necessary. Invariant natural killer T (iNKT) cells are ideal cell carriers for developing allogeneic cell therapy because they are powerful immune cells targeting cancers without graft-versus-host disease (GvHD) risk. However, healthy donor blood contains extremely low numbers of endogenous iNKT cells. Here, by combining hematopoietic stem cell (HSC) gene engineering and *in vitro* differentiation, we generate human allogeneic HSC-engineered iNKT (<sup>Allo</sup>HSC-iNKT) cells at high yield and purity; these cells closely resemble endogenous iNKT cells, effectively target tumor cells using multiple mechanisms, and exhibit high safety and low immunogenicity. These cells can be further engineered with chimeric antigen receptor (CAR) to enhance tumor targeting or/and gene edited to ablate surface human leukocyte antigen (HLA) molecules and further reduce immunogenicity. Collectively, these preclinical studies demonstrate the feasibility and cancer therapy potential of <sup>Allo</sup>HSC-iNKT cell products and lay a foundation for their translational and clinical development.

## INTRODUCTION

Over the past decade, immunotherapy has become the new-generation cancer medicine.<sup>1–3</sup> In particular, T-cell-based cancer therapy has shown great promise.<sup>4</sup> An outstanding example is the chimeric antigen receptor (CAR)-engineered T (CAR-T) cell adoptive therapy, which targets certain blood cancers at impressive efficacy and has been approved by the US Food and Drug Administration (FDA) to treat CD19<sup>+</sup> B cell malignancies.<sup>4–6</sup>

Adoptive transfer of *in vitro* expanded tumor-infiltrating T lymphocytes (TILs) and T cell receptor (TCR)-engineered T cells also show promise in treating some blood cancers and solid tumors in the clinic.<sup>7,8</sup> However, most of the current T cell therapies fall in the category of autologous cell therapy, wherein T cells collected from a patient are manufactured and used to treat that single patient. Such an approach is time consuming, logistically challenging, and costly; furthermore, for patients with heavily lymphopenic pretreatment or rapidly proliferative disease,

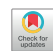

it might not always be possible to produce autologous cell products.<sup>5,9</sup> Allogeneic cell products that can be manufactured at large scale and distributed readily to treat a broad range of cancer patients therefore are in great demand.

Conventional  $\alpha\beta$  T cells have been utilized for generating allogeneic cell products; however, these T cells risk inducing graft-versus-host disease (GvHD) in allogeneic hosts due to histocompatibility leukocyte antigen (HLA) incompatibility, thereby requiring additional gene editing to ablate their endogenous TCR expression that may potentially increase manufacture complexity.<sup>10–13</sup> Innate immune cells such as natural killer (NK) cells that have no GvHD risk have been investigated; however, NK cells may have limited *in vivo* clonal expansion and antitumor performance compared to T cells.<sup>14,15</sup>

Invariant NK T (iNKT) cells are a small population of  $\alpha\beta$  T lymphocytes.<sup>16</sup> iNKT cells have several unique features, making them ideal for developing off-the-shelf cellular therapy for cancer. Compared to conventional T cells, iNKT cells can attack tumor cells using multiple mechanisms and at higher efficacy; can more effectively traffic to and infiltrate solid tumors; can alter solid tumor immunosuppressive microenvironment; and, most importantly, do not induce GvHD.<sup>17–25</sup> However, human blood contains extremely low numbers of iNKT cells (0.001%–1%), making it very difficult to reliably grow large numbers of allogeneic iNKT cells for cell therapies.<sup>26</sup> Moreover, allogeneic iNKT products expanded from blood may contain bystander allogeneic conventional  $\alpha\beta$  T cells and thus risk inducing GvHD. Technology breakthroughs are needed to exploit the allogeneic cell therapy potential of iNKT cells.

Previously, we have established a method to generate large numbers of iNKT cells through TCR gene engineering of hematopoietic stem cells (HSCs) followed by *in vivo* reconstitution; using this method, we have successfully generated both mouse and human HSC-engineered iNKT (HSC-iNKT) cells.<sup>27,28</sup> However, such an *in vivo* approach cannot be used to produce off-the-shelf mature allogeneic iNKT cells.<sup>27,28</sup> Here, we intended to build on the HSC-iNKT engineering approach and develop an *in vitro* culture method to produce large numbers of off-the-shelf human iNKT cells for allogeneic cell therapy applications. We report the preclinical development of the proposed allogeneic HSC-iNKT cell therapy, demonstrating its manufacture feasibility, cancer therapy potential, and high safety profile.

## RESULTS

### Generation of allogeneic HSC-engineered iNKT (<sup>Allo</sup>HSC-iNKT) cells

Human CD34<sup>+</sup> cells collected from either cord blood (CB) or granulocyte-colony-stimulating factor (G-CSF)-mobilized human peripheral blood stem cells (PBSCs) were transduced with a Lenti/iNKT-sr39TK vector and then cultured *in vitro* in a two-stage artificial thymic organoid (ATO)/ $\alpha$ -galactosylceramide ( $\alpha$ GC) culture system (Figure 1A). Note CD34<sup>+</sup> cells comprise both hematopoietic stem and progenitor cells; in this report we refer to CD34<sup>+</sup> cells as HSCs. The Lenti/iNKT-sr39TK vector has been previously used to develop an autologous HSC-engineered iNKT cell therapy for cancer<sup>28</sup>; ATO is an *in vitro* 3D culture that supports the human HSC differentiation into T cells,<sup>29,30</sup>

while  $\alpha$ GC is a synthetic agonist glycolipid ligand that specifically stimulates iNKT cells.<sup>16</sup> We routinely achieved over 50% lenti-vector transduction rate of HSCs (Figure 1B). Transduced HSCs were then placed in the stage 1 ATO culture, where they differentiated into human iNKT cells over a course of 8 weeks with over 100-fold expansion (Figures 1A and 1C). At the end of stage 1 culture, ATOs were dissociated into single cells that were then placed in the stage 2  $\alpha$ GC expansion culture for another 2–3 weeks, resulting in another 100- to 1,000-fold expansion and an <sup>Allo</sup>HSC-iNKT cell product of high yield and purity (Figures 1A and 1D).

In the ATO/ $\alpha$ GC culture, <sup>Allo</sup>HSC-iNKT cells followed a typical iNKT cell development path defined by CD4/CD8 co-receptor expression.<sup>31</sup> During stage 1, <sup>Allo</sup>HSC-iNKT cells transited from CD4<sup>–</sup>CD8<sup>–</sup> (DN) to CD4<sup>+</sup>CD8<sup>+</sup> (DP), then toward CD4<sup>–</sup>CD8<sup>+/-</sup> (Figure 1E). At the end of stage 2, the majority (>99%) of <sup>Allo</sup>HSC-iNKT cells showed a CD4<sup>–</sup>CD8<sup>+/-</sup> (CD8 SP/DN) phenotype (Figure 1E). Note that the end <sup>Allo</sup>HSC-iNKT cell product did not contain a CD4<sup>+</sup>CD8<sup>–</sup> (CD4 SP) population that are present in the endogenous human iNKT cells (Figure 1E).<sup>31</sup> In general, CD8 SP/DN human iNKT cells are considered to be proinflammatory and highly cytotoxic and thereby are desirable for cancer immunotherapy.<sup>24,31–35</sup>

Flow cytometry analysis showed that the <sup>Allo</sup>HSC-iNKT cell product comprised high-purity transgenic iNKT cells (Figure 1D); single-cell TCR sequencing analysis confirmed that these <sup>Allo</sup>HSC-iNKT cells uniformly expressed the transgenic iNKT TCRs while nearly undetectable randomly recombined endogenous  $\alpha\beta$  TCRs (Figure 1F). In sharp contrast to <sup>Allo</sup>HSC-iNKT cells, conventional  $\alpha\beta$  T cells isolated from health donor periphery blood (denoted as PBMC-Tc cells) expressed highly diverse endogenously recombined  $\alpha\beta$  TCRs, whereas iNKT cells isolated from health donor periphery blood (denoted as PBMC-iNKT cells) expressed a conserved invariant TCR  $\alpha$  chain (V $\alpha$ 24-J $\alpha$ 18) and limited diverse TCR  $\beta$  chains (dominantly V $\beta$ 11) (Figure 1F).

The manufacture of <sup>Allo</sup>HSC-iNKT cells was highly robust; we generated <sup>Allo</sup>HSC-iNKT cell products of high purity and yield from all 12 donors tested (4 CB-HSCs and 8 PBSCs) (Figures 1G and 1H). Based on our results, it was estimated that from one CB donor (comprising  $\sim 5 \times 10^6$  CB-HSCs),  $\sim 5 \times 10^{11}$  <sup>Allo</sup>HSC-iNKT cells could be generated that can potentially be formulated into  $\sim 500$ – $5,000$  doses ( $\sim 10^8$ – $10^9$  cells per dose based on the approved CAR-T cell therapy doses<sup>4</sup>); from one PBSC donor (comprising  $\sim 5 \times 10^8$  PBSCs),  $\sim 3 \times 10^{13}$  <sup>Allo</sup>HSC-iNKT cells could be generated that can potentially be formulated into  $\sim 30,000$ – $300,000$  doses (Figure 1G). The resulting <sup>Allo</sup>HSC-iNKT cell product contained pure transgenic iNKT cells and nearly undetectable bystander conventional  $\alpha\beta$  T cells, thereby lack of GvHD risk and suitable for “off-the-shelf” application.

### Phenotype and functionality of <sup>Allo</sup>HSC-iNKT cells

Next, we analyzed the phenotype and functionality of <sup>Allo</sup>HSC-iNKT cells in comparison with endogenous human PBMC-iNKT and PBMC-Tc cells. <sup>Allo</sup>HSC-iNKT cells displayed a phenotype closely resembling PBMC-iNKT cells but distinct from PBMC-Tc cells; they expressed high levels of memory T cell markers

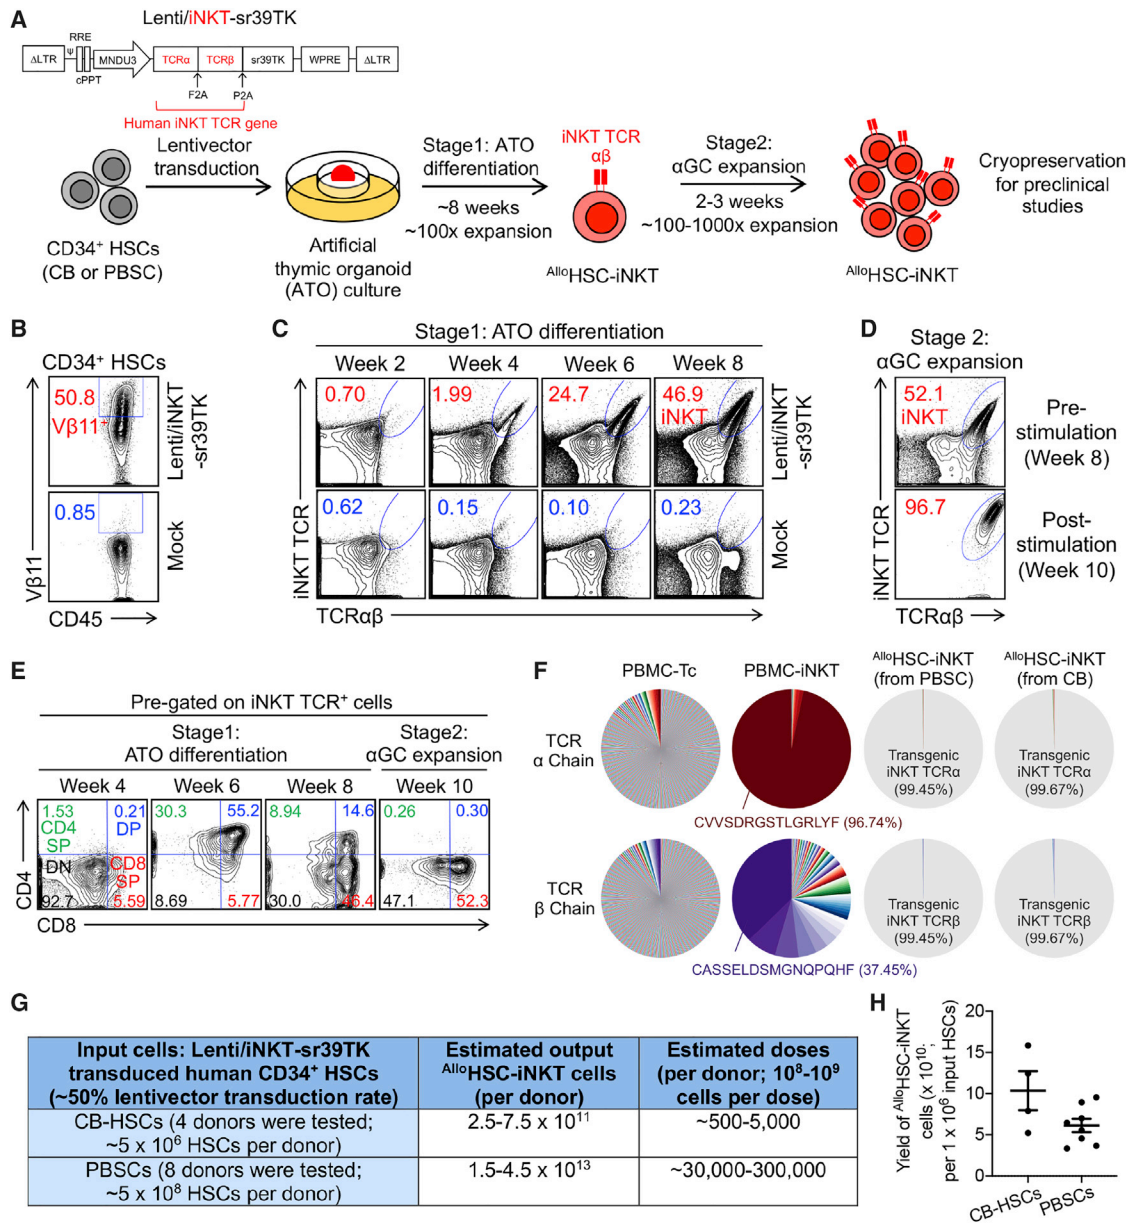

**Figure 1. *In vitro* generation of allogenic HSC-engineered iNKT (AlloHSC-iNKT) cells**

(A) Experimental design to generate AlloHSC-iNKT cells *in vitro*. HSC, hematopoietic stem cell; CB, cord blood; PBSC, peripheral blood stem cell; αGC, α-galactosylceramide; Lenti/iNKT-sr39TK, lentiviral vector encoding an iNKT TCR gene and an sr39TK suicide/positron emission tomography (PET) imaging gene. (B–E) Fluorescence-activated cell sorting (FACS) monitoring of AlloHSC-iNKT cell generation. (B) Intracellular expression of iNKT TCR (identified as Vβ11<sup>+</sup>) in CD34<sup>+</sup> HSCs at 72 h after lentivector transduction. (C) Generation of iNKT cells (identified as iNKT TCR<sup>+</sup>TCRαβ<sup>+</sup> cells) during stage 1 ATO differentiation culture. A 6B11 monoclonal antibody was used to stain iNKT TCR. (D) Expansion of iNKT cells during stage 2 αGC expansion culture. (E) Expression of CD4/CD8 co-receptors on AlloHSC-iNKT cells during stage 1 and stage 2 cultures. DN, CD4/CD8 double negative; CD4 SP, CD4 single positive; DP, CD4/CD8 double positive; CD8 SP, CD8 single positive. (F) Single-cell TCR sequencing analysis of AlloHSC-iNKT cells. Healthy donor peripheral blood mononuclear cell (PBMC)-derived conventional αβ T (PBMC-Tc) and iNKT (PBMC-iNKT) cells were included as controls. The relative abundance of each unique T cell receptor (TCR) sequence among the total unique sequences identified for individual cells is represented by a pie slice. (G) Table summarizing experiments that have successfully generated AlloHSC-iNKT cells. (H) Yields of AlloHSC-iNKT cells generated from multiple HSC donors. Representative of 1 (F) and >10 experiments (A–E).



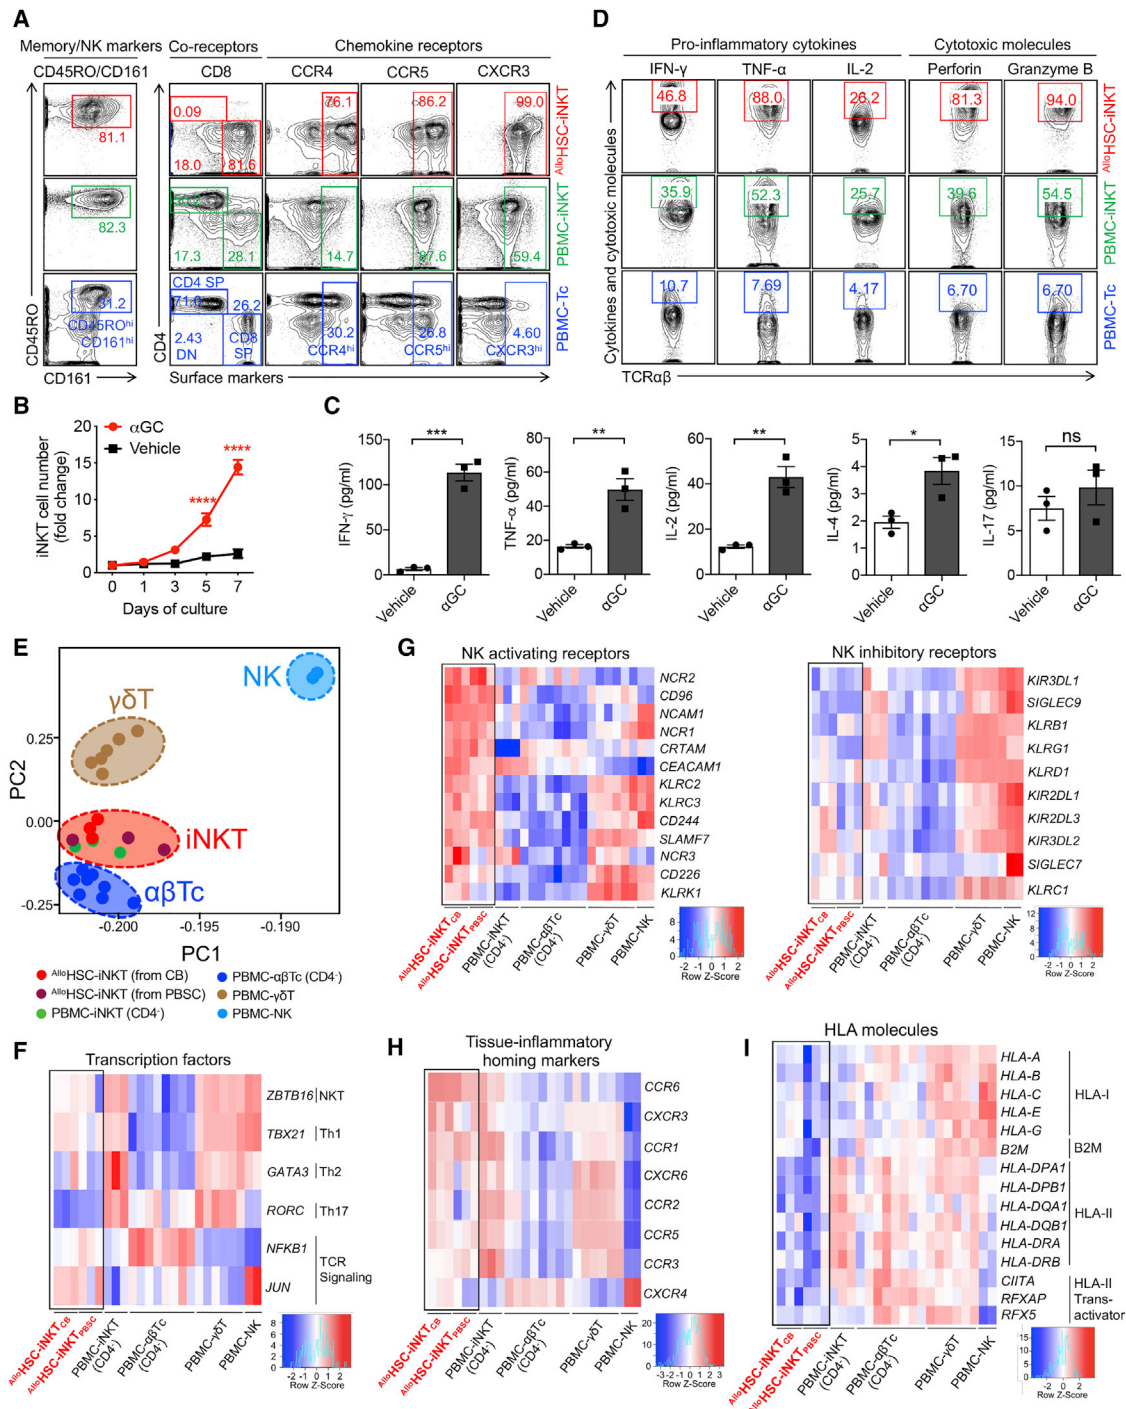

**Figure 2. Characterization and gene profiling of  $AlloHSC-iNKT$  cells**

(A) FACS detection of surface markers on  $AlloHSC-iNKT$  cells. PBMC-iNKT and PBMC-Tc cells were included as controls. (B and C) Antigen responses of  $AlloHSC-iNKT$  cells.  $AlloHSC-iNKT$  cells were cultured for 7 days, in the presence or absence of  $\alpha GC$  (denoted as  $\alpha GC$  or Vehicle, respectively). (B) Cell growth curve (n = 3). (C) ELISA analyses of cytokine (IFN- $\gamma$ , TNF- $\alpha$ , IL-2, IL-4 and IL-17) production at day 7 post  $\alpha GC$  stimulation (n = 3). (D) FACS detection of intracellular cytokines and cytotoxic molecules in  $AlloHSC-iNKT$  cells. PBMC-iNKT and PBMC-Tc cells were included as controls. (E–I) Deep RNA-seq analysis of  $AlloHSC-iNKT$  cells generated from CB- or PBSC-derived  $CD34^+$  HSCs (n = 3 for each). Healthy donor PBMC-derived conventional  $CD4^+$   $\alpha\beta$  T (PBMC- $\alpha\beta$ Tc; n = 8),  $CD4^+$  iNKT (PBMC-iNKT; n = 3),  $\gamma\delta$  T (PBMC- $\gamma\delta$ T; n = 6), and NK (PBMC-NK; n = 2) cells were included as controls. N indicates

(legend continued on next page)

(i.e., CD45RO), NK cell markers (i.e., CD161), and peripheral tissue and inflammatory site homing markers (i.e., CCR4, CCR5 and CXCR3) (Figure 2A). When stimulated with  $\alpha$ GC,  $\text{AlloHSC-iNKT}$  cells proliferated vigorously (Figure 2B) and secreted high levels of Th0/Th1 cytokines (i.e., interferon- $\gamma$  [IFN- $\gamma$ ], tumor necrosis factor  $\alpha$  [TNF- $\alpha$ ], and interleukin-2 [IL-2]) but limited amounts of Th2 cytokines (i.e., IL-4) and Th17 cytokines (i.e., IL-17) (Figure 2C), indicating a Th0/Th1-prone functionality of  $\text{AlloHSC-iNKT}$  cells that agrees with their CD8 SP/DN phenotype (Figures 1E and 2A).<sup>24,31–33</sup> Intracellular staining showed that at the single-cell level,  $\text{AlloHSC-iNKT}$  cells produced exceedingly high levels of effector cytokines (i.e., IFN- $\gamma$ , TNF- $\alpha$ , and IL-2) and cytotoxic molecules (i.e., perforin and granzyme B) (Figure 2D). The ability to generate excess amounts of antitumor effector molecules is a promising signature of iNKT cells for cancer immunotherapy.<sup>26,36</sup>

### Transcriptome profiling of $\text{AlloHSC-iNKT}$ cells

To fully characterize  $\text{AlloHSC-iNKT}$  cells, we performed deep RNA sequencing (RNA-seq) analysis of these cells;  $\text{AlloHSC-iNKT}$  cells generated from both CB and PBSC CD34<sup>+</sup> HSCs were studied. Healthy donor PBMC-derived endogenous iNKT (PBMC-iNKT), conventional  $\alpha\beta$  T (PBMC- $\alpha\beta$ Tc),  $\gamma\delta$  T (PBMC- $\gamma\delta$ T), and NK (PBMC-NK) cells were included as controls. All cell types were prepared from multiple donors. Because  $\text{AlloHSC-iNKT}$  cells were dominantly CD4<sup>-</sup> (CD8 SP/DN), the CD4<sup>-</sup> subpopulations of PBMC-iNKT (CD8 SP/DN) and PBMC- $\alpha\beta$ Tc (CD8<sup>+</sup>) cells were analyzed in this experiment.

Principal-component analysis (PCA) of the global gene expression profiles showed that  $\text{AlloHSC-iNKT}$  cells (both CB and PBSC-derived) were located the closest to PBMC-iNKT cells, next to PBMC- $\alpha\beta$ Tc and PBMC- $\gamma\delta$ T cells, and the furthest from PBMC-NK cells, validating the iNKT cell nature of  $\text{AlloHSC-iNKT}$  cells (Figure 2E).<sup>37</sup>

“Master” transcription factor gene profiling analysis revealed a distinctive signature of  $\text{AlloHSC-iNKT}$  cells; they expressed high levels of *ZBTB16* that encodes PLZF, a signature transcription factor of innate T (e.g., iNKT and  $\gamma\delta$ T) cells and NK cells<sup>38</sup>; they expressed high levels of *TBX21* that encodes T-bet, an essential transcription factor regulating Th1 polarization of T cells<sup>39</sup>; they expressed low levels of *GATA3* and *RORC* that respectively encode GATA3 and ROR $\gamma$ , critical transcription factors regulating Th2 and Th17 polarization of T cells<sup>40</sup>; and they expressed high levels of *NFKB1* and *JUN* that respectively encode NF- $\kappa$ B1 and c-Jun, important transcription factors for TCR signaling (Figure 2F).<sup>41,42</sup> These transcription factors have been indicated to play important roles in regulating iNKT cell development and functionality.<sup>43–45</sup> Of note, the *TBX21*<sup>high</sup>*GATA3*<sup>low</sup>*RORC*<sup>low</sup> expression profile of  $\text{AlloHSC-iNKT}$  cells consists with their Th0/Th1-prone cytokine production profile (Figure 2C).

Further analysis of the various genes related to antitumor effector functions (e.g., genes encoding activation/homing markers, cytokines, and cytotoxic molecules) revealed  $\text{AlloHSC-iNKT}$

cells to be highly potent effector cells, in agreement with their *in vitro* phenotype and functionality characterization (Figures 2A–2D). In addition, several interesting gene signatures stood out, which are highlighted below.

Typical iNKT cells exert NK function besides T cell function, via surface expression of NK receptors.<sup>16,18,46</sup> Interestingly, compared to PBMC-iNKT and even PBMC-NK cells,  $\text{AlloHSC-iNKT}$  cells expressed exceedingly high levels of NK activating receptor genes (e.g., *NCAM1*, *NCR1*, *NCR2*, *KLR2*, and *KLR3*) but low levels of NK inhibitory receptor genes (e.g., *KIR3DL1*, *KIR3DL2*, *KIR2DL1*, and *KIR2DL2*), suggesting that  $\text{AlloHSC-iNKT}$  cells might exhibit a superior antitumor NK function (Figure 2G).

Tissue inflammatory homing markers expressed on effector immune cells enable them to access inflammatory tissues including tumor sites.<sup>32,47</sup>  $\text{AlloHSC-iNKT}$  cells expressed exceedingly high levels of multiple tissue inflammatory homing marker genes (e.g., *CCR1*, *CCR2*, *CCR3*, *CCR5*, *CCR6*, and *CXCR3*), comparable to those of endogenous innate T cells (i.e., PBMC-iNKT and PBMC- $\gamma\delta$ T cells) but significantly higher than those of endogenous conventional  $\alpha\beta$  T and NK cells (i.e., PBMC- $\alpha\beta$ Tc and PBMC-NK cells), suggesting a strong capacity of  $\text{AlloHSC-iNKT}$  cells to home to and penetrate tumor sites (Figure 2H).

HLA incompatibility may trigger host T-cell-mediated allo-rejection of adoptively transferred allogeneic cellular products, thereby limiting their therapeutic efficacy.<sup>48,49</sup> Interestingly, compared to all of the endogenous T cells (i.e., PBMC-iNKT, PBMC- $\alpha\beta$ Tc, and PBMC- $\gamma\delta$ T cells) and NK cells (i.e., PBMC-NK cells) tested,  $\text{AlloHSC-iNKT}$  cells expressed much lower levels of HLA-expression-related genes (e.g., genes encoding HLA-I molecules, B2M, HLA-II molecules, and HLA-II transactivators), suggesting that  $\text{AlloHSC-iNKT}$  cells might naturally resist allo-rejection and thereby have certain advantages over many PBMC-derived allogeneic cell products for off-the-shelf cell therapy (Figure 2I).

### Tumor targeting of $\text{AlloHSC-iNKT}$ cells through intrinsic NK function

Following the NK lead of our RNA-seq study (Figure 2G), we investigated the NK phenotype and antitumor function of  $\text{AlloHSC-iNKT}$  cells in comparison with those of endogenous PBMC-NK cells. Flow cytometry analysis of cell surface markers showed that  $\text{AlloHSC-iNKT}$  cells expressed significantly higher levels of NK activating receptors (i.e., NKG2D and DNAM-1) while nearly undetectable NK inhibitory receptors (i.e., killer cell immunoglobulin-like receptors, KIRs) (Figures 3A and 3B). NK activating receptors recognize stress molecules (e.g., MIC-A/B and UL16-binding protein 1-4, ULBP1-4, recognized by NKG2D and CD112 and CD155 recognized by DNAM-1) upregulated on many tumor cells and trigger tumor targeting,<sup>50–52</sup> while NK inhibitory receptors recognize matched “self” major histocompatibility complex (MHC) molecules and suppress tumor

different donors. (E) Principal-component analysis (PCA) plot showing the ordination of all six cell types. (F–I) Heatmaps showing the expression of selected genes encoding transcription factors (F), NK activating and inhibitory receptors (G), tissue inflammatory homing markers (H), and HLA molecules (I) for all six cell types. Representative of 1 (E–I) and 3 (A–D) experiments. Data are presented as the mean  $\pm$  SEM ns, not significant, \*p < 0.05, \*\*p < 0.01, \*\*\*p < 0.001, \*\*\*\*p < 0.0001, by Student's t test.

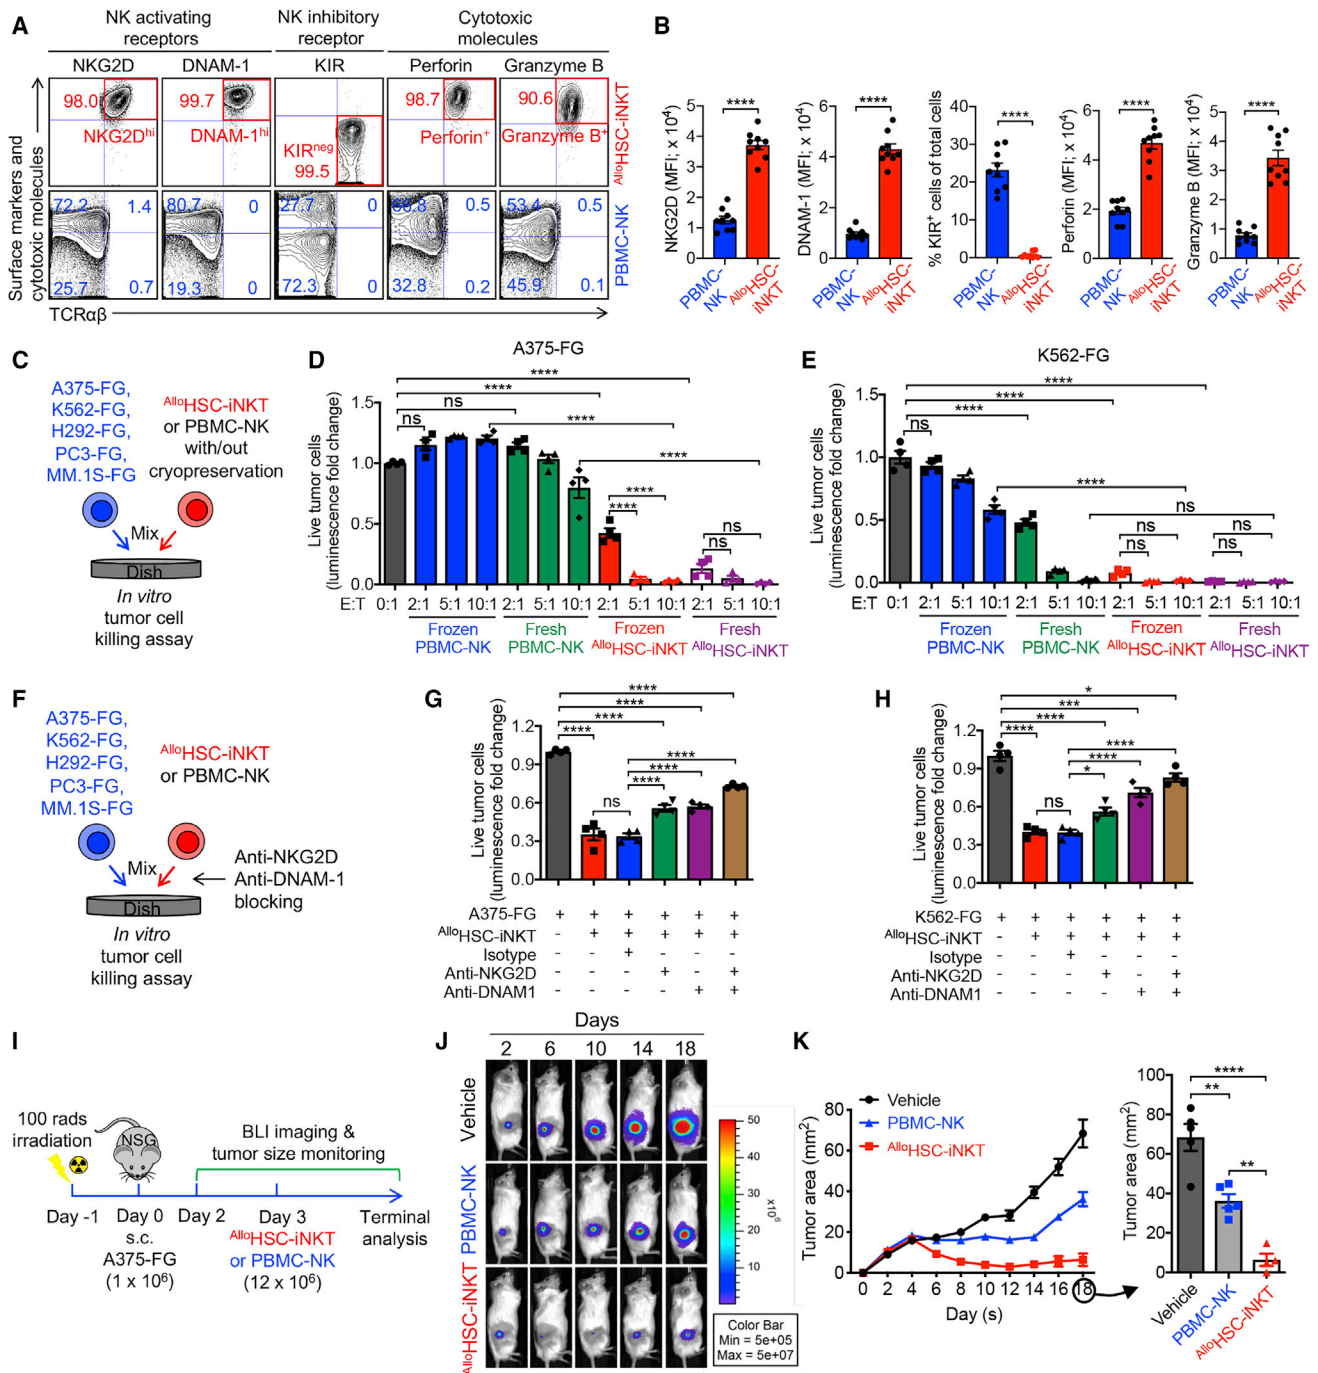

### Figure 3. Tumor targeting of $AlloHSC-iNKT$ cells through intrinsic NK function

(A and B) FACS analyses of surface NK receptor expression and intracellular cytotoxic molecule production by  $AlloHSC-iNKT$  cells. PBMC-NK cells were included as a control. (A) Representative FACS plots. (B) Quantification of (A) ( $n = 9$ ).

(C–E) *In vitro* direct killing of human tumor cells by  $AlloHSC-iNKT$  cells. PBMC-NK cells were included as a control. Both fresh and frozen-thawed cells were studied. Five human tumor cell lines were studied: A375 (melanoma), K562 (myelogenous leukemia), H292 (lung cancer), PC3 (prostate cancer), and MM.1S (multiple myeloma). All tumor cell lines were engineered to express firefly luciferase and green fluorescence protein (FG) dual reporters. (C) Experimental design. (D and E) Tumor killing data of A375-FG human melanoma cells (D) and K562-FG human myelogenous leukemia cells (E) at 24 h ( $n = 4$ ).

(F–H) Tumor killing mechanisms of  $AlloHSC-iNKT$  cells. NKG2D- and DNAM-1-mediated pathways were studied. (F) Experimental design. (G) Tumor killing data of A375-FG human melanoma cells at 24 h (tumor/iNKT ratio 1:2;  $n = 4$ ). (H) Tumor killing data of K562-FG human myelogenous leukemia cells at 24 h (tumor/iNKT ratio 1:1;  $n = 4$ ).

(legend continued on next page)



killing.<sup>53,54</sup> Flow cytometry analysis of intracellular effector molecules showed that compared to PBMC-NK cells,  $AlloHSC-iNKT$  cells produced exceedingly higher levels of cytotoxic molecules (i.e., perforin and granzyme B) (Figures 3A and 3B). Collectively, these results confirmed a promising antitumor potential of  $AlloHSC-iNKT$  cells through their intrinsic NK function.

An attractive feature of NK-cell-based cancer immunotherapy is its capacity to target a broad range of tumor cells independent of HLA and tumor antigen restrictions.<sup>50</sup> However, NK-cell-based therapy also confronts several significant challenges, such as the limited *in vivo* efficacy of NK cells, as well as their intolerance to cryopreservation, that pose a significant technical hurdle to their clinical and commercial applications.<sup>55,56</sup> Based on the “super-active” NK phenotype of  $AlloHSC-iNKT$  cells, we wondered whether these cells might exhibit improved antitumor NK function. Moreover, unlike NK cells, iNKT cells can resist cryopreservation<sup>57</sup>; we therefore wondered whether  $AlloHSC-iNKT$  cells might also improve on this aspect.

Using an *in vitro* tumor cell killing assay, we evaluated the tumor killing efficacy of  $AlloHSC-iNKT$  cells in comparison with PBMC-NK cells (Figure 3C). Five human tumor cell lines were used as targets, including a leukemia cell line (K562), a melanoma cell line (A375), a lung cancer cell line (H292), a prostate cancer cell line (PC3), and a multiple myeloma cell line (MM.1S). All five tumor cell lines were engineered to overexpress the firefly luciferase (Fluc) and enhanced green fluorescence protein (EGFP) dual reporters to enable the convenient monitoring of these tumor cells using either luciferase assay or flow cytometry (Figure S1A). Compared to PBMC-NK cells,  $AlloHSC-iNKT$  cells exhibited a significantly enhanced tumor killing efficacy across all five tumor cell lines (Figures 3D, 3E, and S1B–S1D). Interestingly,  $AlloHSC-iNKT$  cells sustained strong tumor killing efficacy after cryopreservation, whereas PBMC-NK cells were sensitive to freeze-thaw cycles and showed greatly reduced viability and antitumor capacity following cryopreservation (Figures 3D, 3E, and S1B–S1D). Blocking of NK activating receptors (i.e., NKG2D and DNAM-1) reduced tumor killing efficacy of  $AlloHSC-iNKT$  cells (Figures 3F–3H and S1E–S1G), confirming their NK-activating-receptor-mediated tumor-targeting function.

Next we evaluated the *in vivo* antitumor efficacy of  $AlloHSC-iNKT$  cells using a human melanoma xenograft NSG (NOD.Cg-Prkdc<sup>scid</sup>Il2rg<sup>tm1Wjl</sup>/SzJ) mouse model. A375-FG tumor cells were subcutaneously inoculated into NSG mice to form solid tumors, followed by a paratumoral injection of  $AlloHSC-iNKT$  or PBMC-NK cells (Figure 3I).  $AlloHSC-iNKT$  cells effectively suppressed tumor growth at an efficacy higher than that of PBMC-NK cells, as evidenced by time-course live animal bioluminescence imaging (BLI) monitoring (Figures 3J and S1H), tumor size measurement (Figure 3K), and terminal tumor weight assessment (Figure S1I).

Taken together, these studies support a cancer therapy potential of  $AlloHSC-iNKT$  cells through their intrinsic NK function, allowing these cells to target a broad range of tumors indepen-

dent of HLA and tumor antigen restrictions. Attractively,  $AlloHSC-iNKT$  cells may exhibit improved antitumor efficacy and cryopreservation resistance compared to NK-cell-based allogeneic cell therapy products.

### Tumor targeting of $AlloHSC-iNKT$ cells through engineered CARs

CAR-engineered cell therapy has great promise for treating cancer<sup>4–6,58</sup>; we therefore explored the potential of  $AlloHSC-iNKT$  cells as the allogeneic cell carriers for CAR-directed off-the-shelf cell therapy. A second-generation B cell maturation antigen (BCMA)-targeting CAR (BCAR) was used for this study (Figure S2A); this BCAR contains 4-1BB and CD3 $\zeta$  signaling domains and has shown clinical efficacy in treating human multiple myeloma (MM).<sup>59</sup>

$AlloHSC-iNKT$  cells were generated as previously described (Figure 1A); mature  $AlloHSC-iNKT$  cells were further transduced with a Retro/BCAR-tEGFR retroviral vector to produce the BCAR-engineered  $AlloHSC-iNKT$  cells (denoted as  $AlloBCAR-iNKT$  cells) (Figure 4A). The entire culture time (~10–11 weeks) and cell yield (~ $10^{11}$  per CB donor or ~ $10^{12}$  per PBSC donor) were similar to those of generating non-CAR-engineered  $AlloHSC-iNKT$  cells (Figures 1A and 1G). The resulting  $AlloBCAR-iNKT$  cells were pure iNKT cells with a high BCAR expression rate (>98% iNKT TCR<sup>+</sup> and up to 80% BCAR<sup>+</sup>; Figure 4B) and displayed a typical human iNKT cell phenotype and functionality similar to those of  $AlloHSC-iNKT$  cells (Figures 2A, 2D, S2C, and S2D). Therefore,  $AlloHSC-iNKT$  cells can be effectively engineered to express CARs without compromising cell yield and quality.

To assess the antitumor capacity of  $AlloBCAR-iNKT$  cells, we used an established *in vitro* MM.1S-CD1d-FG tumor cell killing assay<sup>28</sup>; non-CAR-engineered  $AlloHSC-iNKT$  cells, as well as healthy donor PBMC-derived conventional T cells with or without engineering with the same BCAR (denoted as PBMC-T or BCAR-T cells), were included as controls (Figure 4C). The MM.1S-CD1d-FG cell line was generated by engineering the parental BCMA-positive MM.1S human MM cell line to overexpress human CD1d and the Fluc-EGFP dual reporters,<sup>28</sup> mimicking a large portion of primary patient MM samples that are BCMA<sup>+</sup>CD1d<sup>+</sup> (Figure S2B).<sup>60</sup> This *in vitro* tumor cell killing assay allowed us to evaluate the tumor killing capacity of  $AlloBCAR-iNKT$  cells, as well as investigate their possible NK/TCR/CAR triple mechanisms for targeting MM (Figure 4D).

$AlloHSC-iNKT$  cells without BCAR engineering were able to kill MM.1S-CD1d-FG tumor cells, while PBMC-T cells could not, indicating an intrinsic antitumor NK function of  $AlloHSC-iNKT$  cells (Figures 4E, S1D, and S1G); this intrinsic antitumor NK function was inherited by  $AlloBCAR-iNKT$  cells, as confirmed by NK activating receptor (i.e., DNAM-1) blocking assay (Figure 4F). Meanwhile, the tumor cell killing efficacy of  $AlloHSC-iNKT$  cells was enhanced by the addition of  $\alpha$ GC that did not happen to PBMC-T cells, indicating an iNKT TCR-mediated antitumor

(I–K) Studying the *in vivo* antitumor efficacy of  $AlloHSC-iNKT$  cells in an A375-FG human melanoma xenograft NSG mouse model. (I) Experimental design. BLI, live animal bioluminescence imaging. (J) BLI images showing tumor loads in experimental mice over time. (K) Tumor size measurements over time (n = 4–5). Representative of three experiments. Data are presented as the mean  $\pm$  SEM. ns, not significant; \*p < 0.05; \*\*p < 0.01; \*\*\*p < 0.001; \*\*\*\*p < 0.0001 by Student's t test (B) or one-way ANOVA (D, E, G, H, and K). See also Figure S1.



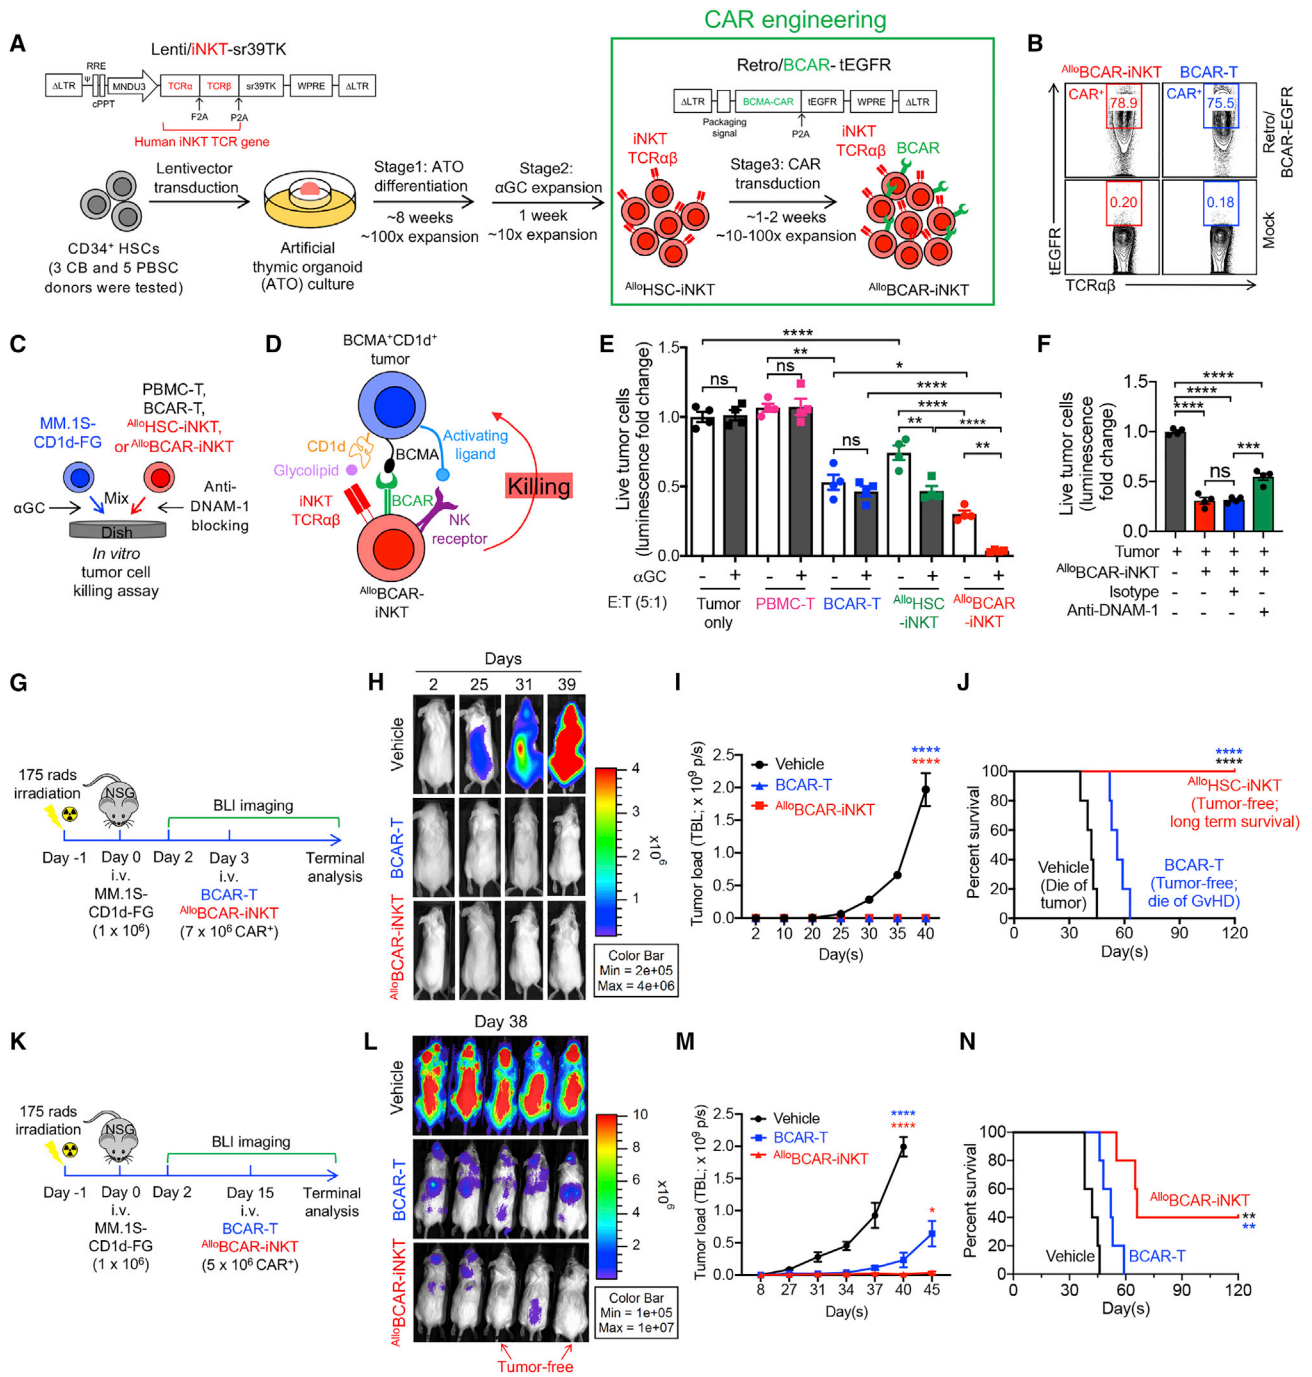

**Figure 4. Tumor targeting of  $\text{AlloHSC-iNKT}$  cells through engineered chimeric antigen receptors (CARs)**

(A) Experimental design to generate BCMA CAR-engineered  $\text{AlloHSC-iNKT}$  ( $\text{AlloBCAR-iNKT}$ ) cells *in vitro*. BCMA, B cell maturation antigen; BCAR, BCMA CAR; Retro/BCAR-tEGFR, retroviral vector encoding a BCMA CAR gene as well as a truncated epidermal growth factor receptor (tEGFR) reporter gene. tEGFR was used as a staining marker indicating BCAR expression.

(B) FACS analysis of BCAR expression (identified as tEGFR<sup>+</sup>) on  $\text{AlloBCAR-iNKT}$  at 72 h after retrovector transduction. Healthy donor PBMC-T cells transduced with the same Retro/BCAR-tEGFR vector (denoted as BCAR-T cells) were included as a staining control.

(C–F) *In vitro* killing of human multiple myeloma cells by  $\text{AlloBCAR-iNKT}$  cells. MM.1S-CD1d-FG, human MM.1S cell line engineered to overexpress human CD1d as well as FG dual reporters. PBMC-T, BCAR-T, and  $\text{AlloHSC-iNKT}$  cells were included as effector cell controls. (C) Experimental design. (D) Diagram showing the tumor-targeting triple mechanisms of  $\text{AlloBCAR-iNKT}$  cells, mediated by NK activating receptors, iNKT TCR, and BCAR. (E) Tumor cell killing by the indicated effector cells with/without the addition of  $\alpha\text{GC}$  (n = 4). (F) Tumor cell killing by  $\text{AlloBCAR-iNKT}$  cells with/without the blockade of DNAM-1 (n = 4). Tumor cell killing was analyzed at 8-h after co-culture (effector/tumor ratio 5:1).

(legend continued on next page)

function of  $Allo$ HSC-iNKT cells; this TCR-mediated antitumor function was also inherited by  $Allo$ BCAR-iNKT cells (Figure 4E). Importantly, compared to  $Allo$ HSC-iNKT cells,  $Allo$ BCAR-iNKT cells showed stronger tumor cell killing, indicating a CAR-mediated antitumor function of  $Allo$ BCAR-iNKT cells (Figure 4E). Therefore,  $Allo$ BCAR-iNKT cells are able to target MM tumor cells using the NK/TCR/CAR triple mechanisms, which may grant  $Allo$ BCAR-iNKT cells a higher tumor-targeting efficacy and an enhanced capacity to counteract tumor antigen escape compared to conventional BCAR-T cells (Figures 4D–4F).<sup>25,61,62</sup>

The *in vivo* antitumor efficacy of  $Allo$ BCAR-iNKT cells was studied using an established MM.1S-CD1d-FG xenograft NSG mouse model<sup>28</sup>; conventional BCAR-T cells were included as a control. In low-tumor-load conditions,  $Allo$ BCAR-iNKT cells eliminated MM tumor cells as effectively as BCAR-T cells (Figures 4H and 4I); however, experimental mice treated with BCAR-T cells eventually died of graft-versus-host disease (GvHD) despite being tumor-free, while experimental mice treated with  $Allo$ BCAR-iNKT cells lived long-term with tumor-free and GvHD-free (Figures 4I and 4J). Impressively, in high-tumor-load conditions,  $Allo$ BCAR-iNKT cells still managed to suppress tumor growth effectively and achieved tumor clearance in a fraction of experimental mice (two out of five mice); conventional BCAR-T cells suppressed tumor growth less well and could not achieve tumor clearance (Figures 4K–4N and S2E).

Taken together, these studies support an attractive potential of  $Allo$ HSC-iNKT cells as off-the-shelf cell carriers for CAR-directed cancer immunotherapy. The high antitumor efficacy and multiple tumor-targeting mechanisms of CAR-engineered  $Allo$ HSC-iNKT cells may provide new opportunities to target hard-to-treat tumors and counteract tumor antigen escape.

### Safety study of $Allo$ HSC-iNKT cells

Graft-versus-host (GvH) response is the primary safety concern of an off-the-shelf allogeneic cell therapy.<sup>4</sup> Since iNKT cells do not react to mismatched HLA molecules and protein alloantigens, these cells are not expected to mount GvH responses.<sup>17,19</sup> To verify this safety feature of  $Allo$ HSC-iNKT cells, we performed both *in vitro* and *in vivo* studies. In an *in vitro* mixed lymphocyte reaction (MLR) assay, in sharp contrast to conventional PBMC-Tc cells,  $Allo$ HSC-iNKT cells did not react to all the mismatched healthy donor PBMCs tested, as evidence by their lack of IFN- $\gamma$  production (Figures 5A and 5B). In an *in vivo* NSG mouse xenograft model, unlike PBMC-Tc cells that induced GvHD and killed experimental mice  $\sim$ 2 months after PBMC-Tc cell transfer,  $Allo$ HSC-iNKT cells did not cause GvHD and sustained long-term survival of experimental mice (Figures 5C and 5D). The lack of GvHD in  $Allo$ HSC-iNKT cell engrafted experimental mice was confirmed by histology analysis showing healthy tissue structures without

lymphocyte infiltrations; on the contrary, analyses of PBMC-Tc cell engrafted experimental mice showed severe tissue damages associated with heavy lymphocyte infiltrations (Figures 5E and 5F). To study the influence of CAR engineering, we analyzed the GvH response of  $Allo$ BCAR-iNKT cells; BCAR-T cells were included as a control. Distinct from BCAR-T cells,  $Allo$ BCAR-iNKT cells showed no response in the *in vitro* MLR assay (Figures S3A and S3B) and induced no GvHD in the human MM xenograft NSG mouse model (Figures S3C and S3D), indicating that CAR engineering and tumor encountering do not change the GvH-free safety feature of  $Allo$ HSC-iNKT cells.

Besides GvHD risk, allogeneic cell therapy may confer other safety risks, including those common to cell-based cancer immunotherapy, such as cytokine release syndrome (CRS) and neurotoxicity.<sup>63</sup> Although we did not observe that  $Allo$ HSC-iNKT cells induced tissue toxicity in our NSG xenograft mouse models (Figures 5E and 5F), these safety studies may be limited by the utilized preclinical animal models.<sup>63</sup> Additional safety controls may be necessary, especially for initial clinical development. We therefore have engineered a “safety switch” in  $Allo$ HSC-iNKT cell products by incorporating a suicide gene (i.e., sr39TK) in the human iNKT TCR gene delivery vector, resulting in  $Allo$ HSC-iNKT cells that are 100% labeled with the suicide gene (Figure 1A). In cell culture, addition of guanosine analog (ganciclovir [GCV]) effectively killed  $Allo$ HSC-iNKT cells (Figure S3E); in an NSG mouse xenograft model, administration of GCV effectively depleted  $Allo$ HSC-iNKT cells from all tissues examined (e.g., liver, spleen, and lung; Figures 5G–5I). Of note, GCV has been used clinically as a prodrug to induce sr39TK-mediated suicide effect in cellular products.<sup>64</sup> Other alternative suicide switch systems (e.g., inducible Cas9 and truncated EGFR) can certainly be utilized.<sup>4,65–67</sup>

Taken together, our results show that  $Allo$ HSC-iNKT cells are free of GvHD risk and can be equipped with an additional safety switch, making them suitable for off-the-shelf allogeneic cell therapy.

### Immunogenicity study of $Allo$ HSC-iNKT cells

For allogeneic cell therapies, immunogenicity can be a concern, because allorecognition by host T and NK cells can greatly limit the efficacy of therapeutic allogeneic cells.<sup>68</sup> Host conventional CD8 and CD4  $\alpha\beta$  T cells reject allogeneic cells by recognizing mismatched HLA-I and HLA-II molecules, respectively.<sup>69,70</sup> In a classical *in vitro* MLR assay studying T-cell-mediated host-versus-graft (HvG) response via IFN- $\gamma$  secretion reading, compared to endogenous conventional T and iNKT (i.e., PBMC-Tc and PBMC-iNKT) cells,  $Allo$ HSC-iNKT cells triggered a significantly reduced HvG response (Figures 6A, 6C, and S4A). Our previous RNA-seq study

(G–N) Studying the *in vivo* antitumor efficacy of  $Allo$ BCAR-iNKT cells in an MM.1S-CD1d-FG human multiple myeloma xenograft NSG mouse model. Tumor-bearing mice injected with BCAR-T cells or no cells (vehicle) were included as controls. (G–J) Low-tumor-load condition. (G) Experimental design. (H) BLI images showing tumor loads in experimental mice over time. (I) Quantification of (H) ( $n = 5$ ). (J) Kaplan-Meier survival curves of experimental mice over a period of 4 months after tumor challenge ( $n = 5$ ). (K–N) High-tumor-load condition. (K) Experimental design. (L) BLI images showing tumor loads in experimental mice at day 38. (M) Quantification of tumor load in experimental mice over time ( $n = 5$ ). (N) Kaplan-Meier survival curves of experimental mice over a period of 4 months after tumor challenge ( $n = 5$ ).

Representative of two experiments (K–N) and three experiments (A–J). Data are presented as the mean  $\pm$  SEM. ns, not significant; \* $p < 0.05$ ; \*\* $p < 0.01$ ; \*\*\* $p < 0.001$ ; \*\*\*\* $p < 0.0001$  by one-way ANOVA (E, F, I, and M), or log rank (Mantel-Cox) test adjusted for multiple comparisons (J and N). See also Figure S2.

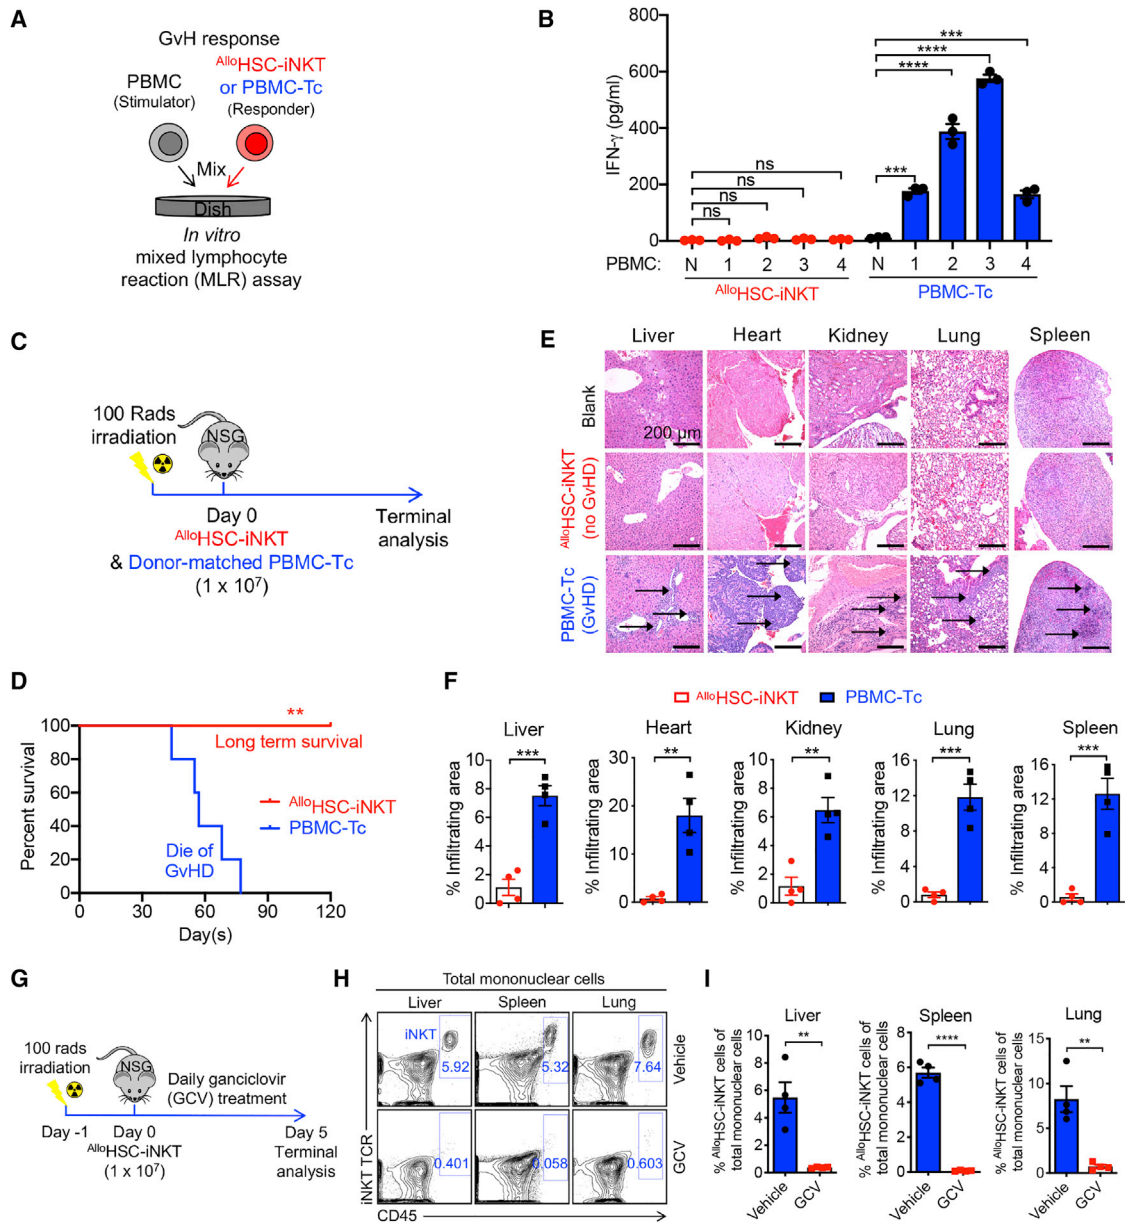

**Figure 5. Safety study of  $AlloHSC-iNKT$  cells**

(A and B) Studying the graft-versus-host (GvH) response of  $AlloHSC-iNKT$  cells using an *in vitro* mixed lymphocyte reaction (MLR) assay. PBMC-Tc cells were included as a responder cell control. (A) Experimental design. PBMCs from four different healthy donors were used as stimulator cells. (B) ELISA analyses of IFN- $\gamma$  production at day 4 (n = 4). N, no stimulator cells.

(C–F) Studying the GvH response of  $AlloHSC-iNKT$  cells using a NSG mouse xenograft model. Donor-matched PBMC-Tc cells were included as a control. (C) Experimental design. (D) Kaplan-Meier survival curves of experimental mice over time (n = 5). (E) H&E-stained tissue sections. Blank indicates tissue sections collected from control NSG mice receiving no adoptive cell transfer. Arrows point to mononuclear cell infiltrates. Scale bar, 200  $\mu$ m. (F) Quantification of (E) (n = 4). (G–I) *In vivo* controlled depletion of  $AlloHSC-iNKT$  cells via GCV treatment. GCV, ganciclovir. (G) Experimental design. (H) FACS detection of  $AlloHSC-iNKT$  cells in the liver, spleen, and lung of NSG mice at day 5. (I) Quantification of (G) (n = 4).

Representative of two experiments. Data are presented as the mean  $\pm$  SEM. ns, not significant; \*p < 0.05; \*\*p < 0.01; \*\*\*p < 0.001; \*\*\*\*p < 0.0001 by one-way ANOVA (B), Student's t test (F and I), or log rank (Mantel-Cox) test adjusted for multiple comparisons (D). See also Figure S3.

made the interesting observation that compared to endogenous immune cells (i.e., conventional  $\alpha\beta$ T, iNKT,  $\gamma\delta$ T, and NK cells),  $AlloHSC-iNKT$  cells globally downregulated the expression of many genes controlling the cell surface display

of HLA-I and HLA-II molecules (Figure 2I). Flow cytometry analysis confirmed that compared to PBMC-Tc and PBMC-iNKT cells,  $AlloHSC-iNKT$  cells expressed significantly reduced levels of HLA-I molecules and nearly undetectable levels of



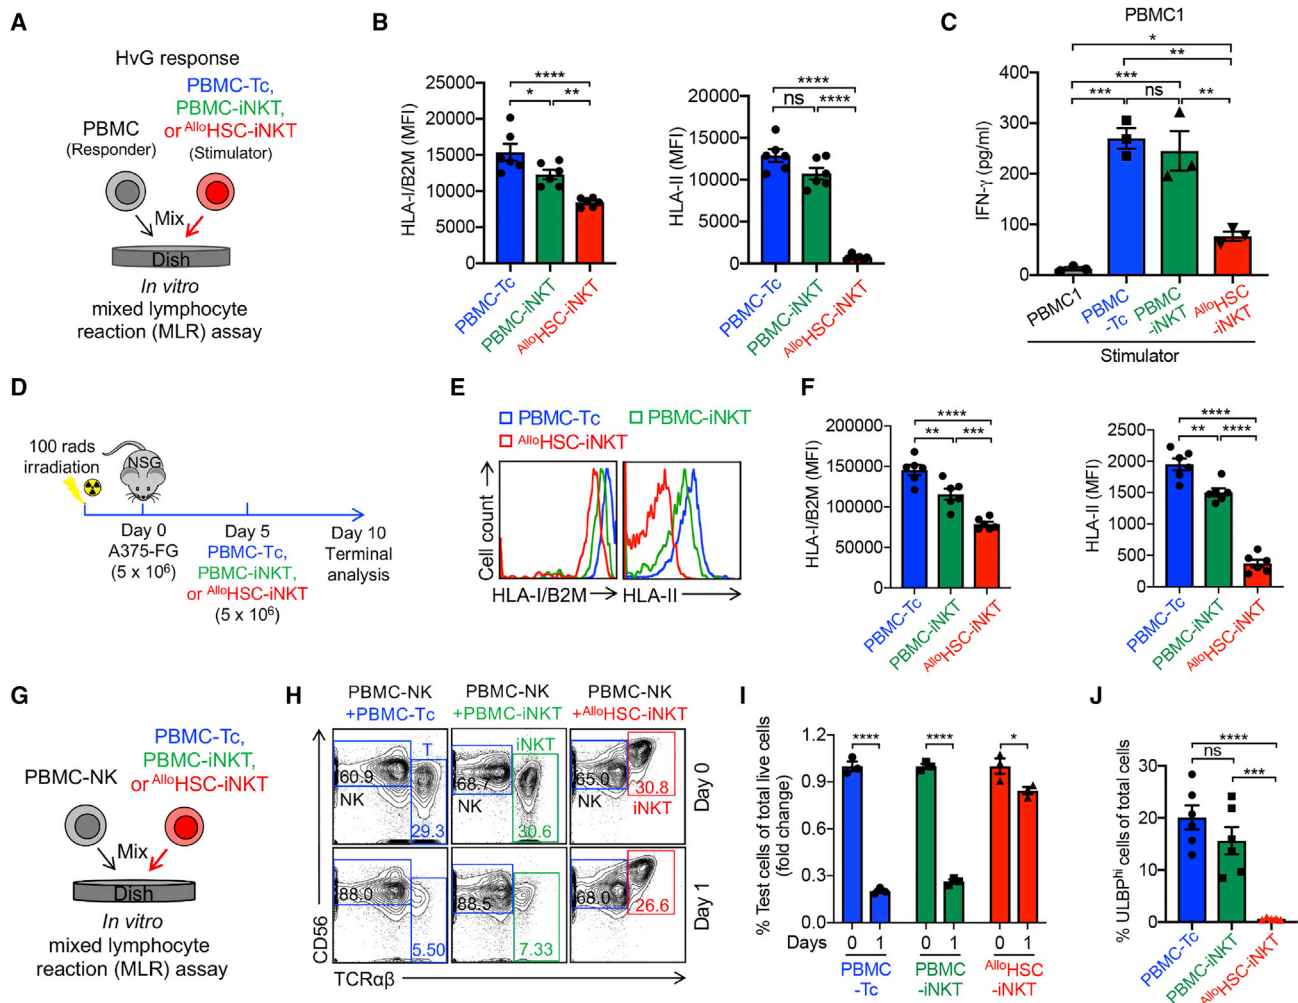

**Figure 6. Immunogenicity study of  $AlloHSC-iNKT$  cells**

(A–C) Studying allogenic T cell response against  $AlloHSC-iNKT$  cells using an *in vitro* MLR assay. Irradiated  $AlloHSC-iNKT$  cells (as stimulators) were co-cultured with donor-mismatched PBMC cells (as responders). Irradiated PBMC-iNKT and PBMC-Tc cells were included as stimulator cell controls. (A) Experimental design. PBMCs from three different healthy donors were used as responders. (B) FACS analyses of HLA-I and HLA-II expression on the indicated stimulator cells (n = 6). (C) ELISA analyses of IFN- $\gamma$  production at day 4 (n = 3).

(D–F) Studying HLA-I/II expression on  $AlloHSC-iNKT$  cells *in vivo* in an A375-FG human melanoma xenograft NSG mouse model. PBMC-iNKT and PBMC-Tc cells were included as effector cell controls. (D) Experimental design. (E) FACS analyses of HLA-I/II expression on the indicated effector cells isolated from A375-FG solid tumors. (F) Quantification of (E) (n = 5).

(G–J) Studying allogenic NK cell response against  $AlloHSC-iNKT$  cells using an *in vitro* MLR assay.  $AlloHSC-iNKT$  cells were co-cultured with donor-mismatched PBMC-NK cells. PBMC-iNKT and PBMC-Tc cells were included as controls. (G) Experimental design. (H) FACS analyses of the indicated cells at days 0 and 1. (I) Quantification of (H) (n = 3). (J) FACS analyses of ULBP expression on the indicated cells (n = 5–6).

Representative of two (D–F) and three (A–C and G–J) experiments. Data are presented as mean  $\pm$  SEM. ns, not significant; \*p < 0.05; \*\*p < 0.01; \*\*\*p < 0.001; \*\*\*\*p < 0.0001 by Student's t test (I) or one-way ANOVA (B, C, F, and G). See also Figures S4–S6.

HLA-II molecules (Figures 6B and S4B), which may account for their resistance to T-cell-mediated H<sub>v</sub>G response (Figures 6C and S4A). Because IFNs can upregulate HLA-I expression,<sup>71</sup> we studied HLA-I expression on  $AlloHSC-iNKT$  cells under IFN- $\gamma$  stimulation (Figure S5A).  $AlloHSC-iNKT$  cells slightly upregulated surface HLA-I expression after IFN- $\gamma$  stimulation; however, their overall surface HLA-I level still remained significantly lower than those of PBMC-Tc and PBMC-iNKT cells (Figures S5B and S5C). Because an *in vivo* inflammatory tumor microenvironment may upregulate the expression of

HLA molecules on tumor-infiltrating immune cells (e.g., via IFN- $\gamma$ ),<sup>72</sup> we also assessed HLA expression on  $AlloHSC-iNKT$  cells in an A375-FG human melanoma xenograft NSG mouse model adapted from a previous study (Figures 3I). A375-FG melanoma cells were subcutaneously inoculated in NSG mice to form solid tumors, followed by injection of  $AlloHSC-iNKT$  cells; PBMC-Tc and PBMC-iNKT cells were included as controls (Figure 6D). Flow cytometry analysis of tumor-infiltrating  $AlloHSC-iNKT$  cells showed that these cells maintained low expression of HLA-I and HLA-II molecules at levels



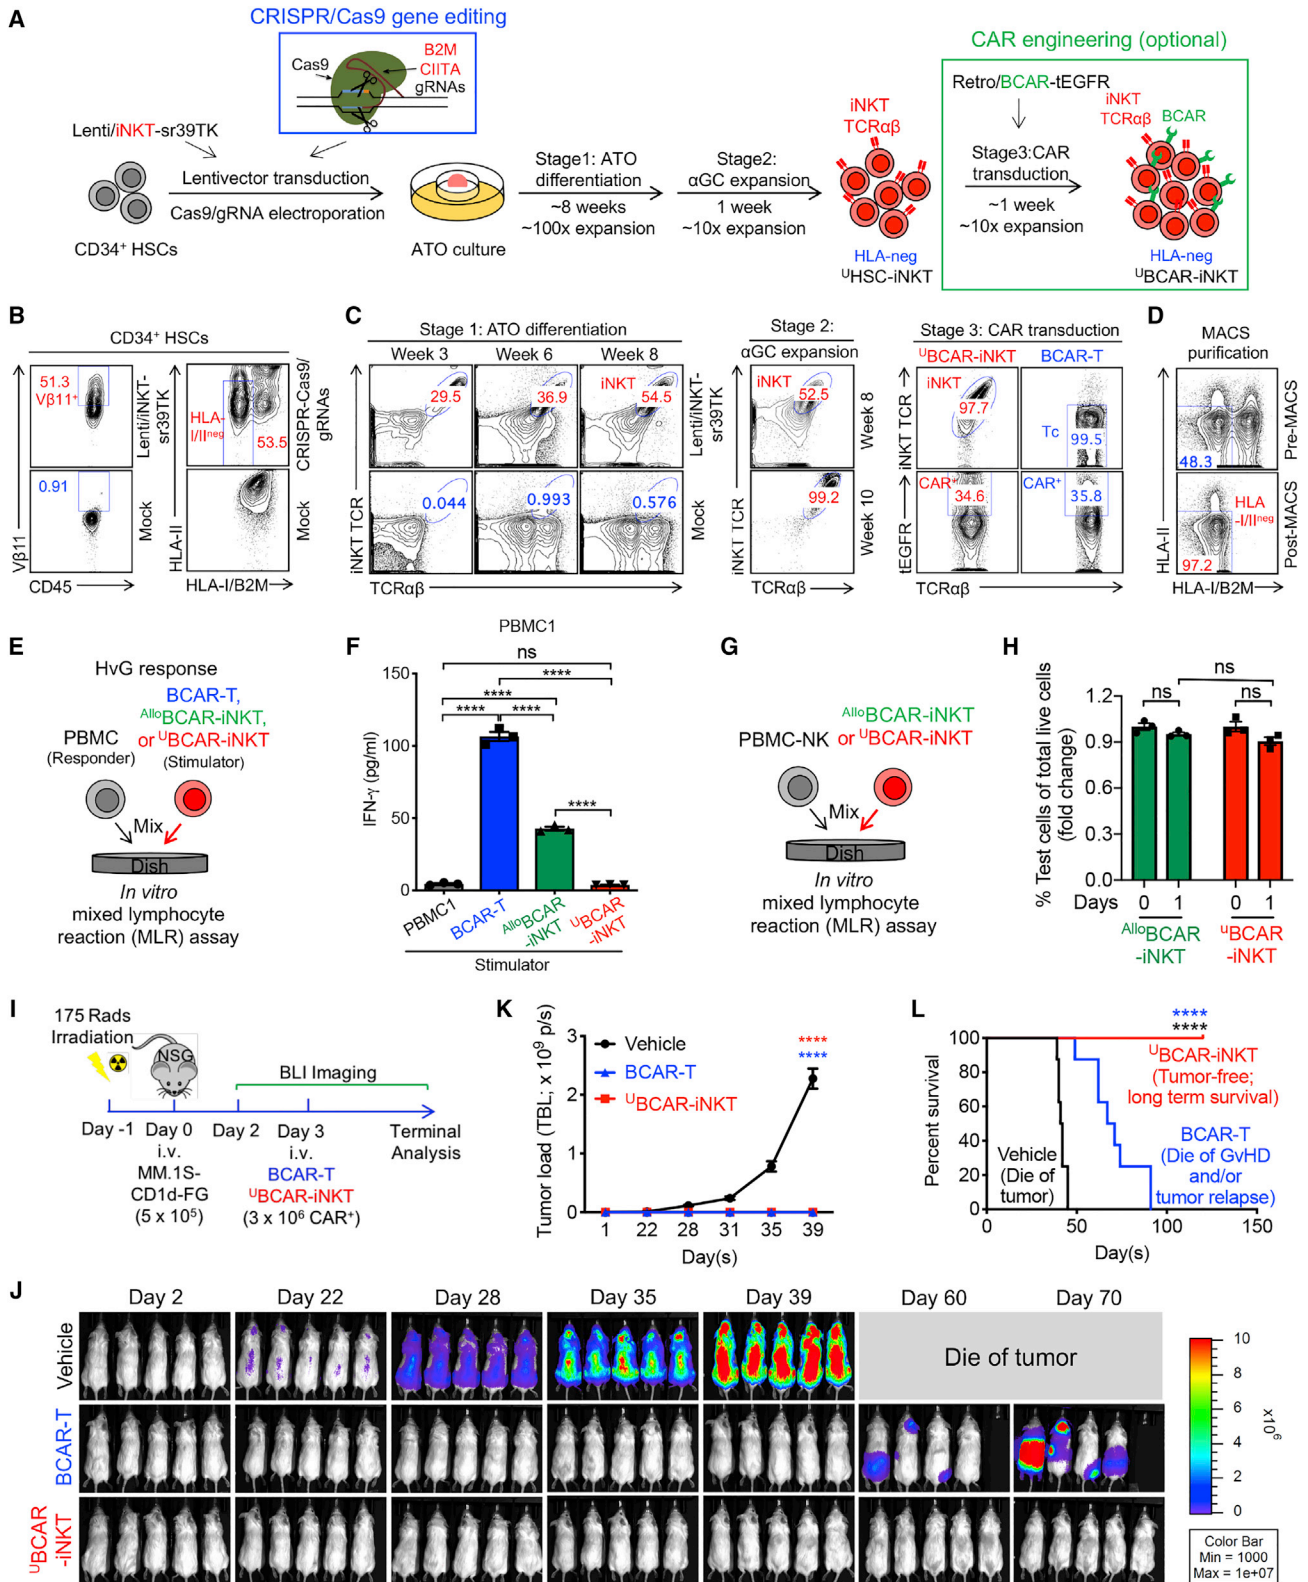

(legend on next page)

significantly lower than those of tumor-infiltrating PBMC-Tc and PBMC-iNKT cells (Figures 6E and 6F).

Next, we studied NK-cell-mediated allojection. Host NK cells reject allogeneic cells through a double-trigger mechanism: (1) “missing self” (i.e., missing of matching HLA-I molecules on allogeneic cells) triggers the release of KIR inhibition, and (2) a “stress signal” (i.e., upregulated stress molecules on allogeneic cells) triggers the activation of NK activating receptors such as NKG2D.<sup>52,73,74</sup> Because <sup>Allo</sup>HSC-iNKT cells expressed low levels of HLA-I molecules, we wondered whether this might make <sup>Allo</sup>HSC-iNKT cells susceptible to host NK rejection. Surprisingly, in an *in vitro* MLR assay studying NK-cell-mediated allojection, compared to endogenous conventional T and iNKT (i.e., PBMC-Tc and PBMC-iNKT) cells, <sup>Allo</sup>HSC-iNKT cells survived rejection by mismatched healthy donor PBMC-derived NK cells significantly better (Figures 6G–6I and S6); correspondingly, NK cells co-cultured with <sup>Allo</sup>HSC-iNKT cells exhibited less upregulation of NK activation markers (i.e., CD107a) (Figures S4D and S4E). Flow cytometry analysis revealed that compared to PBMC-Tc and PBMC-iNKT cells, <sup>Allo</sup>HSC-iNKT cells expressed much reduced and nearly undetectable levels of NKG2D ligands (i.e., ULBP; Figures 6J and S4C),<sup>75</sup> which may be one of the possible mechanisms accounting for their resistance to NK-cell-mediated allojection.

Collectively, these studies revealed a stable HLA-I/II<sup>low</sup> phenotype of <sup>Allo</sup>HSC-iNKT cells that may grant them advantage to resist host T-cell-mediated rejection compared to other healthy donor PBMC-derived allogeneic cell products; meanwhile, <sup>Allo</sup>HSC-iNKT cells also expressed low levels of stress molecules such as NKG2D ligands, making them also resistant to host NK-cell-mediated allojection. These “low immunogenicity” features of <sup>Allo</sup>HSC-iNKT cells support their application for off-the-shelf cell therapy.

### Development of HLA-ablated universal HSC-iNKT (<sup>U</sup>HSC-iNKT) cells and derivatives

Although <sup>Allo</sup>HSC-iNKT cells display a stable HLA-I/II<sup>low</sup> phenotype (Figures 2I, 6B, 6E, 6F, and S4B), their residual HLA-I/II molecules may still make them susceptible to certain levels of host T-cell-mediated allojection. We therefore explored further engi-

neering of the <sup>Allo</sup>HSC-iNKT cell products to achieve total ablation of their surface HLA-I/II molecules. Interestingly, this task can be accomplished by ablation of only two genes: (1) a *B2M* gene encoding the beta 2-microglobulin (B2M) that is required for the surface display of all types of HLA-I molecules,<sup>69</sup> and (2) a *CIITA* gene encoding the class II transactivator (CIITA) that is required for the transcription of all types of HLA-II molecules.<sup>70</sup> Ablation of *B2M* and *CIITA* genes can be achieved by using the powerful gene-editing tools like the CRISPR-Cas9/guide RNA (gRNA) system.<sup>76</sup> We postulated that by combining iNKT TCR gene engineering and B2M/CIITA gene editing, we would produce HLA-ablated “universal” HSC-iNKT (<sup>U</sup>HSC-iNKT) cells totally resistant to host T-cell-mediated allojection. We intended to perform both gene engineering and gene editing on the small numbers of starting HSCs upfront of the HSC-iNKT cell culture; this manufacturing design would save on the use of gene-engineering/editing materials (i.e., lentivector and CRISPR-Cas9/gRNA) that can be cost-limiting, and also enable the maximal gene engineering/editing efficiency that can be carried on into the final <sup>U</sup>HSC-iNKT cell products. Similar to the generation of <sup>Allo</sup>CAR-iNKT cell products (Figure 4A), a CAR engineering step can be incorporated after <sup>U</sup>HSC-iNKT cell differentiation, resulting in HLA-ablated universal CAR-engineered HSC-iNKT (<sup>U</sup>CAR-iNKT) cell products.

CB or PBSC-derived CD34<sup>+</sup> HSCs were transduced with the Lenti/iNKT-sr39TK lentivector; 24 h later, these HSCs were electroporated with a CRISPR-Cas9/B2M-CIITA-gRNAs complex (Figure 7A). The gene-engineering/editing efficiency was high; we routinely achieved over 50% lentivector transduction rate and over 50% HLA-I/II double-ablation rate (Figures 7B and S7B). The engineered HSCs were then put into the HSC-iNKT differentiation ATO culture for 8 weeks followed by 1 week of  $\alpha$ GC expansion (Figures 7A); CRISPR-Cas9 gene editing did not interfere with HSC differentiation into iNKT cells and we obtained high yield of differentiated <sup>U</sup>HSC-iNKT cells similar to that of <sup>Allo</sup>HSC-iNKT cells (Figures 1C and 7C). CRISPR-Cas9 gene editing also did not interfere with the follow-up CAR engineering; we obtained an efficient BCMA-targeting CAR (BCAR) engineering rate similar to that of engineering PBMC-derived conventional BCAR-T cells (Figure 7C). The high HLA-I/II double-ablation rate of the starting HSCs was inherited by the resulting <sup>U</sup>BCAR-iNKT cells (i.e.,

### Figure 7. Development of HLA-ablated universal HSC-iNKT (<sup>U</sup>HSC-iNKT) cells and derivatives

(A) Experimental design to generate <sup>U</sup>HSC-iNKT and BCMA CAR-engineered <sup>U</sup>HSC-iNKT (<sup>U</sup>BCAR-iNKT) cells. CRISPR, clusters of regularly interspaced short palindromic repeats; Cas 9, CRISPR-associated protein 9; gRNA, guide RNA; B2M, beta-2-microglobulin; CIITA, class II major histocompatibility complex transactivator.

(B–D) FACS monitoring of <sup>U</sup>HSC-iNKT and <sup>U</sup>BCAR-iNKT cell generation. (B) Intracellular expression of iNKT TCR (identified as V $\beta$ 11<sup>+</sup>) and surface ablation of HLA-I/II (identified as HLA-I/B2M<sup>-</sup>HLA-II<sup>-</sup>) in CD34<sup>+</sup> HSCs cells at day 5 (72 h after lentivector transduction and 48 h after CRISPR-Cas9 gene editing). (C) Generation of iNKT cells (identified as iNKT TCR<sup>+</sup>TCR $\alpha\beta$ <sup>+</sup> cells) during stage 1 ATO differentiation culture, stage 2  $\alpha$ GC expansion, and stage 3 CAR transduction. Healthy donor PBMC-T cells transduced with the same Retro/BCAR-tEGFR vector was included as a staining control (denoted as BCAR-T cells). (D) Purification of HLA-I/II-negative <sup>U</sup>HSC-iNKT cells using MACS.

(E and F) Studying allogeneic T cell response against <sup>U</sup>BCAR-iNKT cells using an *in vitro* MLR assay. Irradiated <sup>U</sup>BCAR-iNKT cells (as stimulators) were co-cultured with donor-mismatched PBMCs (as responders). Irradiated <sup>Allo</sup>BCAR-iNKT and conventional BCAR-T cells were included as stimulator cell controls. (E) Experimental design. PBMCs from three different healthy donors were used as responders. (F) ELISA analyses of IFN- $\gamma$  production at day 4 (n = 3).

(G and H) Studying allogeneic NK cell response against <sup>U</sup>HSC-iNKT cells using an *in vitro* MLR assay. <sup>U</sup>HSC-iNKT cells were co-cultured with donor-mismatched PBMC-NK cells. <sup>Allo</sup>HSC-iNKT cells were included as a control. (G) Experimental design. (H) FACS quantification of the indicated cells (n = 3).

(I–L) Studying the *in vivo* antitumor efficacy of <sup>U</sup>BCAR-iNKT cells in an MM.1S-CD1d-FG human multiple myeloma xenograft NSG mouse model. (I) Experimental design. (J) BLI images showing tumor loads in experimental mice over time. (K) Quantification of (J) (n = 5). (L) Kaplan-Meier survival curves of experimental mice over a period of 4 months after tumor challenge (n = 8). Mice were combined from two independent experiments.

Representative of two (I–L) and three (B–H) experiments. Data are presented as mean  $\pm$  SEM. ns, not significant; \*\*\*\*p < 0.0001 by Student’s t test (H), one-way ANOVA (F and K), or log rank (Mantel-Cox) test adjusted for multiple comparisons (L). See also Figure S7.

~50% of the resulting cells were HLA-I/II double negative); if needed, the HLA-I/II double-negative cells could be further enriched (to over 97%) using magnetic-activated cell sorting (MACS) via B2M and HLA-II magnetic beads labeling (Figures 7D).

Despite HLA-I/II ablation,  $^U$ BCAR-iNKT cells displayed a typical iNKT phenotype and a highly cytotoxic functionality similar to those of  $^{Allo}$ BCAR-iNKT cells (Figure S7A). As expected,  $^U$ BCAR-iNKT cells induced nearly undetectable T-cell-mediated alloresponse when mixed with mismatched healthy donor PBMCs (Figures 7E, 7F, and S7F); meanwhile,  $^U$ BCAR-iNKT cells maintained the resistance to NK-cell-mediated allorejection (Figures 7G, 7H, and S7G). Safety features of  $^U$ BCAR-iNKT cells resembled those of  $^{Allo}$ BCAR-iNKT cells:  $^U$ BCAR-iNKT cells did not mount GvH response (Figures S7C and S7D), and they were sensitive to sr39TK/GCV-induced suicide control (Figure S7E).

To study whether HLA ablation may impact the antitumor efficacy of  $^U$ BCAR-iNKT cells, we performed *in vitro* and *in vivo* antitumor assays. In an established *in vitro* MM tumor cell killing assay (Figure 4C),  $^U$ BCAR-iNKT cells effectively killed tumor cells at an efficacy comparable to that of  $^{Allo}$ BCAR-iNKT cells (Figures 4E, S7H, and S7I). Similar to  $^{Allo}$ BCAR-iNKT cells,  $^U$ BCAR-iNKT cells could also utilize an NK/TCR/CAR triple mechanisms targeting tumor cells (Figures 4E, 4F, S7I, and S7J), which may grant them an advantage over conventional BCAR-T cells to gain additional antitumor efficacy (Figure S7I), as well as to counteract the BCMA antigen escape that has been reported in conventional BCAR-T cell therapy clinical trials.<sup>25,61,62</sup> In an established *in vivo* human MM xenograft NSG mouse model (Figure 4G),  $^U$ BCAR-iNKT-cell-treated animals achieved total tumor clearance and long-term survival, while BCAR-T-cell-treated animals only achieved partial tumor suppression that was followed by tumor relapse and GvHD development, leading to limited survival benefit (Figures 7I–7L).

Collectively, these studies support the generation of HLA-ablated universal HSC-iNKT cell products and derivatives (e.g., CAR-iNKT cell products) that are fully resistant to host T-cell-mediated allorejection and thereby may have improved *in vivo* persistence and antitumor efficacy.

## DISCUSSION

Here, we report the generation and characterization of allogeneic HSC-engineered iNKT cells and derivatives. Using an *in vitro* HSC-iNKT differentiation cell culture, we generated  $^{Allo}$ HSC-iNKT cells that were of high yield and purity and had high antitumor efficacy, high safety profile (GvH-free and suicide control), and low immunogenicity (largely resistant to T- and NK-cell-mediated allorejection). These  $^{Allo}$ HSC-iNKT cells could be further engineered to express CAR, thereby enhancing their tumor-targeting capacity; these cells can also be further engineered to ablate their surface HLA molecules, thereby enhancing their resistance to host T-cell-mediated allorejection. Collectively, our studies have generated  $^{Allo}$ HSC-iNKT cells and demonstrated them as promising cell carriers for developing off-the-shelf cancer immunotherapy.

Development of allogeneic off-the-shelf cell therapies, many equipped with CARs, is becoming a fast-evolving frontier of can-

cer immunotherapy. Two major categories of such allogeneic cell products are based on engineering healthy-donor-derived conventional  $\alpha\beta$  T cells or NK cells.<sup>14,68,69,77</sup> Because conventional  $\alpha\beta$  T cells risk inducing GvHD in allogeneic hosts due to HLA incompatibility, these T cells need to be gene edited to ablate endogenous TCR expression, usually by disrupting the *TRAC* or/and *TRBC* gene loci, to make them suitable for allogeneic cell therapy but meanwhile may also potentially increase manufacture complexity.<sup>10–13</sup> On the other hand, NK-based allogeneic cell products are considered of low GvHD risk and therefore do not require additional gene editing, but their *in vivo* clonal expansion and antitumor performance may be limited compared to that of conventional  $\alpha\beta$  T cells.<sup>14</sup> Two such allogeneic cell products, conventional  $\alpha\beta$  T-cell-based universal CD19-CAR-engineered T cells (UCART19) and NK-cell-based CB-derived CD19-CAR-engineered NK cells, were recently tested in phase 1 clinical trials treating CD19<sup>+</sup> B cell malignancies.<sup>10,78</sup> These studies reported the feasibility, certain antileukemic activity, and manageable safety profile of the two cell products, showing an encouraging step forward for the field of allogeneic cell therapy.<sup>10,78</sup>

Engineering unconventional innate-type T cells (e.g., iNKT,  $\gamma\delta$  T, and mucosal-associated invariant T cells) that have potent antitumor capacity while being free of GvHD risk represents another promising direction for developing allogeneic cell therapy for cancer, especially for solid tumors.<sup>25,79–83</sup> In particular, iNKT-cell-based cancer immunotherapy has attracted considerable attention. A preclinical study reported the enhanced antilymphoma activity of CAR19-engineered iNKT cells compared to conventional CAR19-T cells.<sup>25</sup> Another preclinical study reported the potent antitumor efficacy to neuroblastoma and no GvHD risk of CAR.GD2-engineered iNKT cells compared to conventional CAR.GD2-T cells.<sup>80</sup> A recent clinical trial testing autologous GD2.CAR-engineered iNKT cells also showed safety and certain efficacy in patients with relapsed or refractory neuroblastoma.<sup>79</sup> These studies suggest the therapeutical potential of iNKT-based cell products and support the development of such cell products for allogeneic cell therapy for cancer even solid tumors.

The *in vitro* HSC-iNKT differentiation cell culture was robust and of high yield (Figure 1G). The resulting  $^{Allo}$ HSC-iNKT cell products were of high purity and nearly free of bystander conventional  $\alpha\beta$  T cells (Figure 1D), which may allow these cell products to be directly used for allogeneic cell therapy without an additional purification step; if necessary, commercially available human iNKT cell isolation reagents (e.g., human anti-iNKT microbeads from Miltenyi) can be used for further purification. Notably, we detected no expression of endogenous TCRs in  $^{Allo}$ HSC-iNKT cells (Figure 1F), suggesting an induction of allelic exclusion by transgenic iNKT TCRs as previously reported.<sup>27,28</sup> The robustness, high yield, and high purity of  $^{Allo}$ HSC-iNKT cell products will facilitate their next-stage translational and clinical development.

The antitumor efficacy of  $^{Allo}$ HSC-iNKT cells is promising. These cells display a typical iNKT phenotype and functionality; they co-express memory T cell and NK cell markers, express high levels of inflammatory tissue/tumor homing markers, and produce high levels of cytokines and cytotoxic molecules, outperforming T and NK cells (Figures 2 and 3). Interestingly,



compared to endogenous cells (i.e., T, NK, and iNKT cells),  $Allo$ HSC-iNKT cells express exceedingly high levels of NK activating receptors and low levels of NK inhibitory receptors (Figure 2G), which is associated with their superior antitumor NK function *in vitro* and *in vivo* (Figure 3). In addition, the NK/TCR/CAR tumor-targeting triple mechanisms of  $Allo$ HSC-iNKT cells and their derivatives grant these cells a stronger antitumor efficacy (Figures 4D–4F, 7I–7J, and S6G–S6I) and may enable them to counteract tumor antigen escape, which has been observed in T-cell-based cancer therapies.<sup>4,25,61,62</sup> Overall, in both the human blood cancer (i.e., MM) and human solid tumor (i.e., melanoma) preclinical mouse xenograft models utilized in this study,  $Allo$ HSC-iNKT cells or their CAR derivatives (i.e.,  $Allo$ BCAR-iNKT and  $U$ BCAR-iNKT cells) showed an enhanced antitumor efficacy compared to healthy donor PBMC-derived NK or CAR-engineered conventional  $\alpha\beta$  T cells, highlighting their cancer therapy potential (Figures 3I–3K, S1H, S1I, 4G–4N, S2E, and 7I–7L). Notably, a synthetic iNKT cell antagonist,  $\alpha$ GC, has been demonstrated to specifically stimulate and expand iNKT cells in both preclinical and clinical studies;  $\alpha$ GC is clinically available and may be used as a “designer stimulator” to enhance the *in vivo* performance of  $Allo$ HSC-iNKT cells.<sup>18,23,84–86</sup>

The safety of  $Allo$ HSC-iNKT cells is appealing. In our studies,  $Allo$ HSC-iNKT cells showed no GvH responses against multiple random healthy donor PBMCs in an *in vitro* MLR assay (Figures 5A, 5B, S3A, and S3B) and no GvHD *in vivo* in multiple human tumor xenograft NSG mouse models (Figures 5C–5F, S3C, and S3D), consistent with their iNKT cell nature and high purity (Figure 1).<sup>16</sup> A suicide switch (e.g., sr39TK/GCV) can also be incorporated into  $Allo$ HSC-iNKT cells to provide an additional safety control (Figure 5G, 5I, and S3E). The high safety of  $Allo$ HSC-iNKT cells strongly support their allogeneic application.

A serendipitous feature of  $Allo$ HSC-iNKT cells is their significantly lower immunogenicity compared to PBMC-derived endogenous immune cells (i.e.,  $\alpha\beta$  T, iNKT,  $\gamma\delta$  T, and NK cells).  $Allo$ HSC-iNKT cells express reduced levels of HLA-I molecules and nearly undetectable levels of HLA-II molecules, which seems to be genomically programmed (Figure 2I) and stable through the *in vitro* culture and *in vivo* persistence even within the tumor microenvironment (Figures 6A–6F); this feature may allow these cells to resist allojection by host T cells and thereby alleviate the need for additional HLA gene editing or intense host T cell depletion preconditioning treatment (e.g., CD52 antibody treatment).<sup>10,13</sup> Meanwhile,  $Allo$ HSC-iNKT cells also express reduced levels of NK activating receptor ligands (e.g., ULBP) (Figure 6J); this feature may allow these cells to also resist allojection by host NK cells and increase their suitability for allogeneic cell therapy (Figures 6G–6I). The biological regulations resulting in this low-immunogenicity feature of  $Allo$ HSC-iNKT cells remain to be illustrated; nonetheless, such biological regulations do not seem to interfere with the production or antitumor efficacy of  $Allo$ HSC-iNKT cells both *in vitro* and *in vivo* (Figures 3, 4, and 7).

The  $Allo$ HSC-iNKT cell production platform is robust and versatile, allowing the plug-in of additional engineering approaches. In our studies, we demonstrated the successful generation of CAR-engineered or/and HLA-I/II-ablated  $Allo$ HSC-iNKT cells by incorporating additional CAR gene engineering and CRISPR-Cas9/

B2M-CITA-gRNAs gene-editing steps (Figures 4 and 7). These additional engineering approaches did not interfere with the production and antitumor function of  $Allo$ HSC-iNKT cells, opening up the possibility of developing more advanced  $Allo$ HSC-iNKT cell products. For example, incorporation of multiple tumor-targeting molecules (e.g., CARs and TCRs) and functional enhancement factors (e.g., overexpression of immune enhancement genes like IL-15, and ablation of immune inhibitory genes like PD-1) may improve the cancer therapy potential of  $Allo$ HSC-iNKT cell products.<sup>87,88</sup>

### Limitations of the study

Despite their promise, current  $Allo$ HSC-iNKT cell products confront certain limitations that may be further improved; the manufacturing process can benefit from switching to a feeder-free culture system that will greatly simplify and accelerate the clinical and commercial development, the sr39TK/GCV suicide switch can be replaced with an alternative suicide switch system (e.g., inducible Cas9 or truncated EGFR) that is less immunogenic and cell-cycle dependent,<sup>4,65–67,89</sup> an *HLA-E* transgene can also be incorporated into the  $Allo$ HSC-iNKT cell products to further increase their resistance to host NK-cell-mediated allojection,<sup>73,90</sup> and pluripotent stem cells (i.e., embryonic stem cells and induced pluripotent stem cells [iPSCs]) may be utilized as an alternative “unlimited” cell source to derive HSCs for the generation of  $Allo$ HSC-iNKT cells.<sup>24</sup> Further exploration of  $Allo$ HSC-iNKT cells as allogeneic cell carriers for developing off-the-shelf cell therapy for the treatment of cancer, especially solid tumors, will certainly be an interesting direction for future study.

### STAR★METHODS

Detailed methods are provided in the online version of this paper and include the following:

- KEY RESOURCES TABLE
- RESOURCE AVAILABILITY
  - Lead contact
  - Materials availability
  - Data and code availability
- EXPERIMENTAL MODEL AND SUBJECT DETAILS
  - Mice
  - Cell Lines
  - Human CD34<sup>+</sup> Hematopoietic Stem Cells (HSCs), Periphery Blood Mononuclear Cells (PBMCs), and Patient Bone Marrow Samples
  - Media and Reagents
- METHOD DETAILS
  - Lentiviral and Retroviral Vectors
  - Antibodies and Flow Cytometry
  - Enzyme-Linked Immunosorbent Cytokine Assays (ELISA)
  - *In Vitro* Generation of Allogeneic HSC-Engineered iNKT ( $Allo$ HSC-iNKT) Cells
  - *In Vitro* Generation of BCMA CAR-Engineered  $Allo$ HSC-iNKT ( $Allo$ BCAR-iNKT) Cells
  - *In Vitro* Generation of HLA-Ablated Universal HSC-iNKT ( $U$ HSC-iNKT) Cells



- Generation of PBMC-Derived Conventional  $\alpha\beta$ T, iNKT,  $\gamma\delta$ T, and NK Cells
- Generation of BCMA CAR-Engineered PBMC T (BCAR-T) cells
- Single Cell TCR Sequencing
- Deep RNA Sequencing (Deep RNaseq) and Data Analysis
- <sup>Allo</sup>HSC-iNKT Cell Phenotype and Functional Study
- *In Vitro* Tumor Cell Killing Assay
- *In Vitro* Mixed Lymphocyte Reaction (MLR) Assay: Studying Graft-Versus-Host (GvH) Response
- *In Vitro* MLR Assay: Studying Host-Versus-Graft (HvG) Response
- *In Vitro* MLR Assay: Studying NK Cell-Mediated Allo-rejection
- Bioluminescence Live Animal Imaging (BLI)
- <sup>Allo</sup>HSC-iNKT Cell *In Vivo* Antitumor Efficacy Study: A375 Human Melanoma Xenograft NSG Mouse Model
- <sup>Allo</sup>BCAR-iNKT Cell *In Vivo* Antitumor Efficacy Study: MM.1S Human MM Xenograft NSG Mouse Model
- <sup>U</sup>BCAR-iNKT Cell *In Vivo* Antitumor Efficacy Study: MM.1S Human MM Xenograft NSG Mouse Model
- Ganciclovir (GCV) *In Vitro* and *In Vivo* Killing Assay
- Histological Analysis
- Statistical Analysis

#### SUPPLEMENTAL INFORMATION

Supplemental information can be found online at <https://doi.org/10.1016/j.xcrm.2021.100449>.

#### ACKNOWLEDGMENTS

We thank the University of California, Los Angeles (UCLA) animal facility for providing animal support; the UCLA Translational Pathology Core Laboratory (TPCL) for providing histology support; the UCLA Technology Center for Genomics & Bioinformatics (TCGB) facility for providing RNA-seq services; the UCLA CFAR Virology Core for providing human cells; and the UCLA BSCRC Flow Cytometry Core Facility for cell sorting support. This work was supported by a Director's New Innovator Award from the NIH (DP2 CA196335, to L.Y.), a Partnering Opportunity for Translational Research Projects Award and a Partnering Opportunity for Discovery Stage Award from the California Institute for Regenerative Medicine (CIRM TRAN1-08533 and DISC2-11157, to L.Y.), a Stem Cell Research Award from the Concern Foundation (to L.Y.), a Research Career Development Award from the STOP CANCER Foundation (to L.Y.), a BSCRC-RHF Research Award from the Rose Hills Research Foundation (to L.Y.), and an Ablon Scholars Award (to L.Y.). Y.-R.L. is a predoctoral fellow supported by the UCLA Whitcome predoctoral fellowship in molecular biology. J.Y. is a predoctoral fellow supported by the UCLA Broad Stem Cell Research Center (BSCRC) predoctoral fellowship. D.L. is a predoctoral fellow supported by T32 Microbial Pathogenesis Training Grant (Ruth L. Kirschstein National Research Service Award, T32-AI007323). Z.L. is a postdoctoral fellow supported by the UCLA Tumor Immunology Training Grant (USHHS Ruth L. Kirschstein Institutional National Research Service Award, T32-CA009120). S.Z. is a predoctoral fellow supported by the UCLA Medical Scientist Training Program Grant (T32-GM008042).

#### AUTHOR CONTRIBUTIONS

Y.-R.L., Y.Zhou, and L.Y. designed the experiments, analyzed the data, and wrote the manuscript. L.Y. conceived and oversaw the study, with assistance from Y.-R.L. and Y.Zhou and suggestions from G.M.C., S.M.L., M.P., A.R., D.B.K., O.N.W., and P.W. Y.-R.L. and Y.Z. performed all experiments, with

assistance from Y.J.K., Y. Zhu, F.M., J.Y., Y.-C.W., X.C., Z.L., Z.S., XiWang, D.L., J.K., T.T., C.H., and J.H. D.C. performed cell sorting. A.M.-H. and C.S.S. helped with ATO culture. J.S. provided MM patient BM samples. F.M. helped with analysis of RNA-seq data. Xiaoyan Wang helped with the statistical analysis of data.

#### DECLARATION OF INTERESTS

Y.-R.L., Y.J.K., J.Y., P.W., Y. Zhu, G.M.C., A.M.-H., C.S.S., and L.Y. are inventors on patents relating to this study filed by UCLA. Y.J.K. is currently an employee of Nkarta. J.Y. and X.W. are currently employees of Appia Bio. X.C. is currently an employee of Atara Bio. Z.L. is currently an employee of Allogene. S.M.L. is a stockholder of 1200 Pharma and TORL BioTherapeutics. A.R. is a consultant for Amgen, Bristol-Meyers Squibb, Chugai, Genentech-Roche, Merck-MSD, Novartis, and Sanofi; a scientific advisory board member of and stockholder with Advaxis, Apricity, Arcus, Bionotech, Compugen, CytomX, Five Prime, FLX-Bio, ImaginAb, Isoplexis, Kite-Gilead, Merus, Rgenix, and Appia Bio; and a co-founder and scientific advisory board member of Lutris, PACT Pharma, and Tango Therapeutics. J.S. is a consultant for Kite and on the speaker bureau for Kite and BMS. D.B.K. is a stockholder and scientific advisory board member of Allogene Therapeutics, Myogene Bio, ImmunoVec and Pluto Therapeutics. O.N.W. currently has consulting, equity, and/or board relationships with Trethera Corporation, Kronos Biosciences, Sofie Biosciences, Breakthrough Properties, Vida Ventures, Nammi Therapeutics, Two River, Iconovir, Appia BioSciences, Neogene Therapeutics, and Allogene Therapeutics. P.W. is a co-founder, stockholder, consultant, and advisory board member of HRain Biotechnology, TCRcure Biopharma, and Appia Bio. G.M.C., C.S.S., and A.M.-H. are cofounders and stockholders of Pluto Immunotherapeutics. L.Y. is a scientific advisor to AlzChem and Amberstone Biosciences, and a co-founder, stockholder, and advisory board member of Appia Bio. None of the declared companies contributed to or directed any of the research reported in this article. The remaining authors declare no competing interests.

Received: January 28, 2021

Revised: August 12, 2021

Accepted: October 19, 2021

Published: November 16, 2021

#### REFERENCES

1. Restifo, N.P., Dudley, M.E., and Rosenberg, S.A. (2012). Adoptive immunotherapy for cancer: harnessing the T cell response. *Nat. Rev. Immunol.* **12**, 269–281.
2. Kalos, M., and June, C.H. (2013). Adoptive T cell transfer for cancer immunotherapy in the era of synthetic biology. *Immunity* **39**, 49–60.
3. Maus, M.V., Fraietta, J.A., Levine, B.L., Kalos, M., Zhao, Y., and June, C.H. (2014). Adoptive immunotherapy for cancer or viruses. *Annu. Rev. Immunol.* **32**, 189–225.
4. Labanieh, L., Majzner, R.G., and Mackall, C.L. (2018). Programming CAR-T cells to kill cancer. *Nat. Biomed. Eng.* **2**, 377–391.
5. Mikkilineni, L., and Kochenderfer, J.N. (2017). Chimeric antigen receptor T-cell therapies for multiple myeloma. *Blood* **130**, 2594–2602.
6. June, C.H., and Sadelain, M. (2018). Chimeric antigen receptor therapy. *N. Engl. J. Med.* **379**, 64–73.
7. Leko, V., and Rosenberg, S.A. (2020). Identifying and Targeting Human Tumor Antigens for T Cell-Based Immunotherapy of Solid Tumors. *Cancer Cell* **38**, 454–472.
8. Rosenberg, S.A., and Restifo, N.P. (2015). Adoptive cell transfer as personalized immunotherapy for human cancer. *Science* **348**, 62–68.
9. Lim, W.A., and June, C.H. (2017). The Principles of Engineering Immune Cells to Treat Cancer. *Cell* **168**, 724–740.
10. Benjamin, R., Graham, C., Yallop, D., Jozwik, A., Mirci-Danicar, O.C., Lucchini, G., Pinner, D., Jain, N., Kantarjian, H., Boissel, N., et al.; UCART19 Group (2020). Genome-edited, donor-derived allogeneic anti-CD19

- chimeric antigen receptor T cells in paediatric and adult B-cell acute lymphoblastic leukaemia: results of two phase 1 studies. *Lancet* 396, 1885–1894.
11. Qasim, W., Zhan, H., Samarasinghe, S., Adams, S., Amrolia, P., Stafford, S., Butler, K., Rivat, C., Wright, G., Somana, K., et al. (2017). Molecular remission of infant B-ALL after infusion of universal TALEN gene-edited CAR T cells. *Sci. Transl. Med.* 9, 1–9.
  12. Stadtmauer, E.A., Fraietta, J.A., Davis, M.M., Cohen, A.D., Weber, K.L., Lancaster, E., et al. (2020). CRISPR-engineered T cells in patients with refractory cancer. *Science* 367, 1–20.
  13. Benjamin, R., Graham, C., Yallop, D., Jozwik, A., Ciocarlie, O., Jain, N., et al. (2018). Preliminary Data on Safety, Cellular Kinetics and Anti-Leukemic Activity of UCART19, an Allogeneic Anti-CD19 CART-Cell Product, in a Pool of Adult and Pediatric Patients with High-Risk CD19+ Relapsed/Refractory B-Cell Acute Lymphoblastic Leukemia. *Blood* 132 (Supplement 1), 896.
  14. Basar, R., Daher, M., and Rezvani, K. (2020). Next-generation cell therapies: the emerging role of CAR-NK cells. *Blood Adv.* 4, 5868–5876.
  15. Becker, P.S.A., Suck, G., Nowakowska, P., Ullrich, E., Seifried, E., Bader, P., Tonn, T., and Seidl, C. (2016). Selection and expansion of natural killer cells for NK cell-based immunotherapy. *Cancer Immunol. Immunother.* 65, 477–484.
  16. Bendelac, A., Savage, P.B., and Teyton, L. (2007). The biology of NKT cells. *Annu. Rev. Immunol.* 25, 297–336.
  17. Haraguchi, K., Takahashi, T., Hiruma, K., Kanda, Y., Tanaka, Y., Ogawa, S., Chiba, S., Miura, O., Sakamaki, H., and Hirai, H. (2004). Recovery of Valpha24+ NKT cells after hematopoietic stem cell transplantation. *Bone Marrow Transplant.* 34, 595–602.
  18. Fujii, S., Shimizu, K., Okamoto, Y., Kunii, N., Nakayama, T., Motohashi, S., et al. (2013). NKT cells as an ideal anti-tumor immunotherapeutic. *Front. Immunol.* 4, 1–7.
  19. de Lalla, C., Rinaldi, A., Montagna, D., Azzimonti, L., Bernardo, M.E., Sangalli, L.M., Paganoni, A.M., Maccario, R., Di Cesare-Merlone, A., Zecca, M., et al. (2011). Invariant NKT cell reconstitution in pediatric leukemia patients given HLA-haploidentical stem cell transplantation defines distinct CD4+ and CD4- subset dynamics and correlates with remission state. *J. Immunol.* 186, 4490–4499.
  20. Chaidos, A., Patterson, S., Szydio, R., Chaudhry, M.S., Dazzi, F., Kanfer, E., McDonald, D., Marin, D., Milojkovic, D., Pavlu, J., et al. (2012). Graft invariant natural killer T-cell dose predicts risk of acute graft-versus-host disease in allogeneic hematopoietic stem cell transplantation. *Blood* 119, 5030–5036.
  21. Rubio, M.T., Boullié, M., Bouazza, N., Coman, T., Trebeden-Nègre, H., Gomez, A., Suarez, F., Sibon, D., Brignier, A., Paubelle, E., et al. (2017). Pre-transplant donor CD4<sup>+</sup> invariant NKT cell expansion capacity predicts the occurrence of acute graft-versus-host disease. *Leukemia* 31, 903–912.
  22. Bae, E.A., Seo, H., Kim, I.K., Jeon, I., and Kang, C.Y. (2019). Roles of NKT cells in cancer immunotherapy. *Arch. Pharm. Res.* 42, 543–548.
  23. Exley, M.A., Friedlander, P., Alatrakchi, N., Vriend, L., Yue, S., Sasada, T., Zeng, W., Mizukami, Y., Clark, J., Nemer, D., et al. (2017). Adoptive transfer of invariant NKT cells as immunotherapy for advanced melanoma: A phase I clinical trial. *Clin. Cancer Res.* 23, 3510–3519.
  24. Kitayama, S., Zhang, R., Liu, T.Y., Ueda, N., Iriguchi, S., Yasui, Y., Kawai, Y., Tatsumi, M., Hirai, N., Mizoro, Y., et al. (2016). Cellular Adjuvant Properties, Direct Cytotoxicity of Re-differentiated V $\alpha$ 24 Invariant NKT-like Cells from Human Induced Pluripotent Stem Cells. *Stem Cell Reports* 6, 213–227.
  25. Rotolo, A., Caputo, V.S., Holubova, M., Baxan, N., Dubois, O., Chaudhry, M.S., Xiao, X., Goudevenou, K., Pitcher, D.S., Petevi, K., et al. (2018). Enhanced Anti-lymphoma Activity of CAR19-iNKT Cells Underpinned by Dual CD19 and CD1d Targeting. *Cancer Cell* 34, 596–610.e11.
  26. Krijgsman, D., Hokland, M., and Kuppen, P.J.K. (2018). The role of natural killer T cells in cancer-A phenotypical and functional approach. *Front. Immunol.* 9, 367.
  27. Smith, D.J., Liu, S., Ji, S., Li, B., McLaughlin, J., Cheng, D., Witte, O.N., and Yang, L. (2015). Genetic engineering of hematopoietic stem cells to generate invariant natural killer T cells. *Proc. Natl. Acad. Sci. USA* 112, 1523–1528.
  28. Zhu, Y., Smith, D.J., Zhou, Y., Li, Y.R., Yu, J., Lee, D., Wang, Y.C., Di Biase, S., Wang, X., Hardoy, C., et al. (2019). Development of Hematopoietic Stem Cell-Engineered Invariant Natural Killer T Cell Therapy for Cancer. *Cell Stem Cell* 25, 542–557.e9.
  29. Seet, C.S., He, C., Bethune, M.T., Li, S., Chick, B., Gschwend, E.H., Zhu, Y., Kim, K., Kohn, D.B., Baltimore, D., et al. (2017). Generation of mature T cells from human hematopoietic stem and progenitor cells in artificial thymic organoids. *Nat. Methods* 14, 521–530.
  30. Montel-Hagen, A., Seet, C.S., Li, S., Chick, B., Zhu, Y., Chang, P., Tsai, S., Sun, V., Lopez, S., Chen, H.C., et al. (2019). Organoid-Induced Differentiation of Conventional T Cells from Human Pluripotent Stem Cells. *Cell Stem Cell* 24, 376–389.e8.
  31. Godfrey, D.I., and Berzins, S.P. (2007). Control points in NKT-cell development. *Nat. Rev. Immunol.* 7, 505–518.
  32. Lee, P.T., Benlagha, K., Teyton, L., and Bendelac, A. (2002). Distinct functional lineages of human V $\alpha$ 24 natural killer T cells. *J. Exp. Med.* 195, 637–641.
  33. Gumperz, J.E., Miyake, S., Yamamura, T., and Brenner, M.B. (2002). Functionally distinct subsets of CD1d-restricted natural killer T cells revealed by CD1d tetramer staining. *J. Exp. Med.* 195, 625–636.
  34. Fujii, S., Liu, K., Smith, C., Bonito, A.J., and Steinman, R.M. (2004). The linkage of innate to adaptive immunity via maturing dendritic cells in vivo requires CD40 ligation in addition to antigen presentation and CD80/86 costimulation. *J. Exp. Med.* 199, 1607–1618.
  35. Fujii, S., Shimizu, K., Hemmi, H., and Steinman, R.M. (2007). Innate Valpha14(+) natural killer T cells mature dendritic cells, leading to strong adaptive immunity. *Immunol. Rev.* 220, 183–198.
  36. Lam, P.Y., Nissen, M.D., and Mattarollo, S.R. (2017). Invariant natural killer T cells in immune regulation of blood cancers: Harnessing their potential in immunotherapies. *Front. Immunol.* 8, 1355.
  37. Menon, V. (2018). Clustering single cells: a review of approaches on high- and low-depth single-cell RNA-seq data. *Brief. Funct. Genomics* 17, 240–245.
  38. Alonzo, E.S., and Sant'Angelo, D.B. (2011). Development of PLZF-expressing innate T cells. *Curr. Opin. Immunol.* 23, 220–227.
  39. Zhang, Y., Zhang, Y., Gu, W., and Sun, B. (2014). TH1/TH2 cell differentiation and molecular signals. *Adv. Exp. Med. Biol.* 841, 15–44.
  40. Gagliani, N., and Huber, S. (2017). Basic aspects of T helper cell differentiation. *Methods Mol. Biol.* 1514, 19–30.
  41. Cartwright, T., Perkins, N.D., and L Wilson, C. (2016). NFKB1: a suppressor of inflammation, ageing and cancer. *FEBS J.* 283, 1812–1822.
  42. Riera-Sans, L., and Behrens, A. (2007). Regulation of alphabeta/gammadelta T cell development by the activator protein 1 transcription factor c-Jun. *J. Immunol.* 178, 5690–5700.
  43. Park, J.Y., DiPalma, D.T., Kwon, J., Fink, J., and Park, J.H. (2019). Quantitative Difference in PLZF Protein Expression Determines iNKT Lineage Fate and Controls Innate CD8 T Cell Generation. *Cell Rep.* 27, 2548–2557.e4.
  44. Kovalovsky, D., Uche, O.U., Eladad, S., Hobbs, R.M., Yi, W., Alonzo, E., Chua, K., Eidson, M., Kim, H.J., Im, J.S., et al. (2008). The BTB-zinc finger transcriptional regulator PLZF controls the development of invariant natural killer T cell effector functions. *Nat. Immunol.* 9, 1055–1064.
  45. Matsuda, J.L., Zhang, Q., Ndonge, R., Richardson, S.K., Howell, A.R., and Gapin, L. (2006). T-bet concomitantly controls migration, survival, and effector functions during the development of Valpha14i NKT cells. *Blood* 107, 2797–2805.

46. Vivier, E., Ugolini, S., Blaise, D., Chabannon, C., and Brossay, L. (2012). Targeting natural killer cells and natural killer T cells in cancer. *Nat. Rev. Immunol.* *12*, 239–252.
47. Thomas, S.Y., Hou, R., Boyson, J.E., Means, T.K., Hess, C., Olson, D.P., Strominger, J.L., Brenner, M.B., Gumperz, J.E., Wilson, S.B., and Luster, A.D. (2003). CD1d-restricted NKT cells express a chemokine receptor profile indicative of Th1-type inflammatory homing cells. *J. Immunol.* *171*, 2571–2580.
48. Fürst, D., Neuchel, C., Tsamadou, C., Schrezenmeier, H., and Mytilineos, J. (2019). HLA Matching in Unrelated Stem Cell Transplantation up to Date. *Transfus. Med. Hemother.* *46*, 326–336.
49. Ozdemir, Z.N., and Civriz Bozdağ, S. (2018). Graft failure after allogeneic hematopoietic stem cell transplantation. *Transfus. Apheresis Sci.* *57*, 163–167.
50. Lee, H.H., Kang, H., and Cho, H. (2017). Natural killer cells and tumor metastasis. *Arch. Pharm. Res.* *40*, 1037–1049.
51. Liu, H., Wang, S., Xin, J., Wang, J., Yao, C., and Zhang, Z. (2019). Role of NKG2D and its ligands in cancer immunotherapy. *Am. J. Cancer Res.* *9*, 2064–2078.
52. Paul, S., and Lal, G. (2017). The molecular mechanism of natural killer cells function and its importance in cancer immunotherapy. *Front. Immunol.* *8*, 1124.
53. Del Zotto, G., Marcenaro, E., Vacca, P., Sivori, S., Pende, D., Della Chiesa, M., Moretta, F., Ingegnere, T., Mingari, M.C., Moretta, A., and Moretta, L. (2017). Markers and function of human NK cells in normal and pathological conditions. *Cytometry B Clin. Cytom.* *92*, 100–114.
54. Ewen, E.M., Pahl, J.H.W., Miller, M., Watzl, C., and Cerwenka, A. (2018). KIR downregulation by IL-12/15/18 unleashes human NK cells from KIR/HLA-I inhibition and enhances killing of tumor cells. *Eur. J. Immunol.* *48*, 355–365.
55. Dominguez, E., Lowdell, M.W., Perez-Cruz, I., Madrigal, A., and Cohen, S.B.A. (1997). Natural killer cell function is altered by freezing in DMSO. *Biochem. Soc. Trans.* *25*, 175S.
56. Li, R., Johnson, R., Yu, G., McKenna, D.H., and Hubel, A.; LI RUI (2019). Preservation of cell-based immunotherapies for clinical trials. *Cytotherapy* *21*, 943–957.
57. Luo, Y., Wang, P., Liu, H., Zhu, Z., Li, C., and Gao, Y. (2017). The state of T cells before cryopreservation: Effects on post-thaw proliferation and function. *Cryobiology* *79*, 65–70.
58. Timmers, M., Roex, G., Wang, Y., Campillo-Davo, D., Van Tendeloo, V.F.I., Chu, Y., Berneman, Z.N., Luo, F., Van Acker, H.H., and Anguille, S. (2019). Chimeric antigen receptor-modified T cell therapy in multiple myeloma: Beyond B cell maturation antigen. *Front. Immunol.* *10*, 1613.
59. Liu, Y., Chen, Z., Fang, H., Wei, R., Yu, K., Jiang, S., et al. (2018). Durable Remission Achieved from Bcma-Directed CAR-T Therapy Against Relapsed or Refractory Multiple Myeloma. *Blood* *132* (Supplement 1), 956.
60. Cohen, A.D. (2018). CAR T Cells and Other Cellular Therapies for Multiple Myeloma: 2018 Update. *Am. Soc. Clin. Oncol. Educ. Book* *38*, e6–e15.
61. Brudno, J.N., Maric, I., Hartman, S.D., Rose, J.J., Wang, M., Lam, N., Stettler-Stevenson, M., Salem, D., Yuan, C., Pavletic, S., et al. (2018). T cells genetically modified to express an anti-B-Cell maturation antigen chimeric antigen receptor cause remissions of poor-prognosis relapsed multiple myeloma. *J. Clin. Oncol.* *36*, 2267–2280.
62. Cohen, A.D., Garfall, A.L., Stadtmauer, E.A., Melenhorst, J.J., Lacey, S.F., Lancaster, E., Vogl, D.T., Weiss, B.M., Dengel, K., Nelson, A., et al. (2019). B cell maturation antigen-specific CAR T cells are clinically active in multiple myeloma. *J. Clin. Invest.* *129*, 2210–2221.
63. Neelapu, S.S., Tummala, S., Kebriaei, P., Wierda, W., Gutierrez, C., Locke, F.L., Komanduri, K.V., Lin, Y., Jain, N., Daver, N., et al. (2018). Chimeric antigen receptor T-cell therapy - assessment and management of toxicities. *Nat. Rev. Clin. Oncol.* *15*, 47–62.
64. Candolfi, M., Kroeger, K.M., Muhammad, A.K., Yagiz, K., Farrokhi, C., Pechnick, R.N., Lowenstein, P.R., and Castro, M.G. (2009). Gene therapy for brain cancer: combination therapies provide enhanced efficacy and safety. *Curr. Gene Ther.* *9*, 409–421.
65. Straathof, K.C., Pulè, M.A., Yotnda, P., Dotti, G., Vanin, E.F., Brenner, M.K., Heslop, H.E., Spencer, D.M., and Rooney, C.M. (2005). An inducible caspase 9 safety switch for T-cell therapy. *Blood* *105*, 4247–4254.
66. Thomis, D.C., Markt, S., Bonini, C., Traversari, C., Gilman, M., Bordignon, C., and Clackson, T. (2001). A Fas-based suicide switch in human T cells for the treatment of graft-versus-host disease. *Blood* *97*, 1249–1257.
67. Watanabe, K., Kuramitsu, S., Posey, A.D., Jr., and June, C.H. (2018). Expanding the therapeutic window for CAR T cell therapy in solid tumors: The knowns and unknowns of CAR T cell biology. *Front. Immunol.* *9*, 2486.
68. Lanza, R., Russell, D.W., and Nagy, A. (2019). Engineering universal cells that evade immune detection. *Nat. Rev. Immunol.* *19*, 723–733.
69. Ren, J., Liu, X., Fang, C., Jiang, S., June, C.H., and Zhao, Y. (2017). Multiplex genome editing to generate universal CAR T cells resistant to PD1 inhibition. *Clin. Cancer Res.* *23*, 2255–2266.
70. Steimle, V., Siegrist, C.A., Mottet, A., Lisowska-Groszpierska, B., and Mach, B. (1994). Regulation of MHC class II expression by interferon- $\gamma$  mediated by the transactivator gene CIITA. *Science* *265*, 106–109.
71. Axelrod, M.L., Cook, R.S., Johnson, D.B., and Balko, J.M. (2019). Biological consequences of MHC-II expression by tumor cells in cancer. *Clin. Cancer Res.* *25*, 2392–2402.
72. Castro, F., Cardoso, A.P., Gonçalves, R.M., Serre, K., and Oliveira, M.J. (2018). Interferon-gamma at the crossroads of tumor immune surveillance or evasion. *Front. Immunol.* *9*, 847.
73. Torikai, H., Reik, A., Soldner, F., Warren, E.H., Yuen, C., Zhou, Y., Crossland, D.L., Huls, H., Littman, N., Zhang, Z., et al. (2013). Toward eliminating HLA class I expression to generate universal cells from allogeneic donors. *Blood* *122*, 1341–1349.
74. Braud, V.M., Allan, D.S., O’Callaghan, C.A., Söderström, K., D’Andrea, A., Ogg, G.S., Lazetic, S., Young, N.T., Bell, J.I., Phillips, J.H., et al. (1998). HLA-E binds to natural killer cell receptors CD94/NKG2A, B and C. *Nature* *391*, 795–799.
75. Cosman, D., Müllberg, J., Sutherland, C.L., Chin, W., Armitage, R., Fanslow, W., Kubin, M., and Chalupny, N.J. (2001). ULBPs, novel MHC class I-related molecules, bind to CMV glycoprotein UL16 and stimulate NK cytotoxicity through the NKG2D receptor. *Immunity* *14*, 123–133.
76. Abrahami, P., Chang, W.G., Kluger, M.S., Qyang, Y., Tellides, G., Saltzman, W.M., and Pober, J.S. (2015). Efficient gene disruption in cultured primary human endothelial cells by CRISPR/Cas9. *Circ. Res.* *117*, 121–128.
77. Aftab, B.T., Sasu, B., Krishnamurthy, J., Gschwend, E., Alcazer, V., and Depil, S. (2020). Toward “off-the-shelf” allogeneic CAR T cells. *Adv. Cell Gene Ther.* *3*, 1–11.
78. Liu, E., Marin, D., Banerjee, P., Macapinlac, H.A., Thompson, P., Basar, R., Nassif Kerbauy, L., Overman, B., Thall, P., Kaplan, M., et al. (2020). Use of CAR-Transduced Natural Killer Cells in CD19-Positive Lymphoid Tumors. *N. Engl. J. Med.* *382*, 545–553.
79. Heczey, A., Courtney, A.N., Montalbano, A., Robinson, S., Liu, K., Li, M., Ghatwai, N., Dakhova, O., Liu, B., Raveh-Sadka, T., et al. (2020). Anti-GD2 CAR-NKT cells in patients with relapsed or refractory neuroblastoma: an interim analysis. *Nat. Med.* *26*, 1686–1690.
80. Heczey, A., Liu, D., Tian, G., Courtney, A.N., Wei, J., Marina, E., Gao, X., Guo, L., Yvon, E., Hicks, J., et al. (2014). Invariant NKT cells with chimeric antigen receptor provide a novel platform for safe and effective cancer immunotherapy. *Blood* *124*, 2824–2833.
81. Deniger, D.C., Moyes, J.S., and Cooper, L.J.N. (2014). Clinical applications of gamma delta T cells with multivalent immunity. *Front. Immunol.* *5*, 636.
82. Li, Y.-R., Zhou, Y., Kramer, A., and Yang, L. (2021). Engineering stem cells for cancer immunotherapy. *Trends Cancer*, S2405-8033(21)00171-0.

83. Zhou, Y., Li, Y.-R., Zeng, S., and Yang, L. (2021). Methods for Studying Mouse and Human Invariant Natural Killer T Cells. *Methods Mol. Biol.* *2388*, 35–57.
84. Kunii, N., Horiguchi, S., Motohashi, S., Yamamoto, H., Ueno, N., Yamamoto, S., Sakurai, D., Taniguchi, M., Nakayama, T., and Okamoto, Y. (2009). Combination therapy of in vitro-expanded natural killer T cells and  $\alpha$ -galactosylceramide-pulsed antigen-presenting cells in patients with recurrent head and neck carcinoma. *Cancer Sci.* *100*, 1092–1098.
85. Motohashi, S., Nagato, K., Kunii, N., Yamamoto, H., Yamasaki, K., Okita, K., Hanaoka, H., Shimizu, N., Suzuki, M., Yoshino, I., et al. (2009). A phase I-II study of  $\alpha$ -galactosylceramide-pulsed IL-2/GM-CSF-cultured peripheral blood mononuclear cells in patients with advanced and recurrent non-small cell lung cancer. *J. Immunol.* *182*, 2492–2501.
86. Yamasaki, K., Horiguchi, S., Kurosaki, M., Kunii, N., Nagato, K., Hanaoka, H., Shimizu, N., Ueno, N., Yamamoto, S., Taniguchi, M., et al. (2011). Induction of NKT cell-specific immune responses in cancer tissues after NKT cell-targeted adoptive immunotherapy. *Clin. Immunol.* *138*, 255–265.
87. Gordy, L.E., Bezbradica, J.S., Flyak, A.I., Spencer, C.T., Dunkle, A., Sun, J., Stanic, A.K., Boothby, M.R., He, Y.W., Zhao, Z., et al. (2011). IL-15 regulates homeostasis and terminal maturation of NKT cells. *J. Immunol.* *187*, 6335–6345.
88. Bae, E.A., Seo, H., Kim, B.S., Choi, J., Jeon, I., Shin, K.S., Koh, C.H., Song, B., Kim, I.K., Min, B.S., et al. (2018). Activation of NKT cells in an anti-PD-1-resistant tumor model enhances antitumor immunity by reinvigorating exhausted CD8 T cells. *Cancer Res.* *78*, 5315–5326.
89. Verzeletti, S., Bonini, C., Marktel, S., Nobili, N., Ciceri, F., Traversari, C., et al. (1998). Herpes Simplex Virus Thymidine Kinase Gene Transfer for Controlled Graft-versus-Host Disease and Leukemia: Clinical Follow-up and Improved New Vectors. *Hum. Gene Ther.* *9*, 2243–2251.
90. Lee, N., Llano, M., Carretero, M., Ishitani, A., Navarro, F., López-Botet, M., and Geraghty, D.E. (1998). HLA-E is a major ligand for the natural killer inhibitory receptor CD94/NKG2A. *Proc. Natl. Acad. Sci. USA* *95*, 5199–5204.



STAR★METHODS

KEY RESOURCES TABLE

| REAGENT or RESOURCE                                    | SOURCE          | IDENTIFIER                     |
|--------------------------------------------------------|-----------------|--------------------------------|
| <b>Antibodies</b>                                      |                 |                                |
| Anti-human IFN- $\gamma$ (ELISA, capture)              | BD Biosciences  | CAT#551221, RRID: AB_394099    |
| Anti-human IFN- $\gamma$ (ELISA, detection)            | BD Biosciences  | CAT#554550, RRID: AB_395472    |
| Anti-human TNF $\alpha$ (ELISA, capture)               | BD Biosciences  | CAT#551220, RRID: AB_394098    |
| Anti-human TNF $\alpha$ (ELISA, detection)             | BD Biosciences  | CAT#554511, RRID: AB_395442    |
| Anti-human IL-2 (ELISA, detection)                     | BD Biosciences  | CAT#554563; RRID: AB_398570    |
| Anti-human IL-2 (ELISA, detection)                     | BD Biosciences  | CAT#555040; RRID: AB_395666    |
| Anti-human IL-4 (ELISA, capture)                       | BD Biosciences  | CAT#554515; RRID: AB_398567    |
| Anti-human IL-4 (ELISA, detection)                     | BD Biosciences  | CAT#554483; RRID: AB_395422    |
| Anti-human CD45 (Clone H130)                           | Biolegend       | CAT#304026, RRID: AB_893337    |
| Anti-human TCR $\alpha\beta$ (Clone I26)               | Biolegend       | CAT#306716, RRID: AB_1953257   |
| Anti-human CD4 (Clone OKT4)                            | Biolegend       | CAT#317414, RRID: AB_571959    |
| Anti-human CD8 (Clone SK1)                             | Biolegend       | CAT#344714, RRID: AB_2044006   |
| Anti-human CD45RO (Clone UCHL1)                        | Biolegend       | CAT#304216, RRID: AB_493659    |
| Anti-human CD161 (Clone HP-3G10)                       | Biolegend       | CAT#339928, RRID: AB_2563967   |
| Anti-human CD69 (Clone FN50)                           | Biolegend       | CAT#310914, RRID: AB_314849    |
| Anti-human CD56 (Clone HCD56)                          | Biolegend       | CAT#318304, RRID: AB_604100    |
| Anti-human CD62L (Clone DREG-56)                       | Biolegend       | CAT#304822, RRID: AB_830801    |
| Anti-human CD14 (Clone HCD14)                          | Biolegend       | CAT#325608, RRID: AB_830681    |
| Anti-human CD11b (Clone ICRF44)                        | Biolegend       | CAT#301330, RRID: AB_2561703   |
| Anti-human CD11c (Clone N418)                          | Biolegend       | CAT#337234, RRID: AB_2566656   |
| Anti-human CD1d (Clone 51.1)                           | Biolegend       | CAT#350308, RRID: AB_10642829  |
| Anti-human CCR4 (Clone L291H4)                         | Biolegend       | CAT#359409, RRID: AB_2562430   |
| Anti-human CCR5 (Clone HEK/1/85a)                      | Biolegend       | CAT#313705, RRID: AB_345305    |
| Anti-human CXCR3 (Clone G025H7)                        | Biolegend       | CAT#306513, RRID: AB_2089652   |
| Anti-human NKG2D (Clone 1D11)                          | Biolegend       | CAT#320812, RRID: AB_2234394   |
| Anti-human DNAM-1 (Clone 11A8)                         | Biolegend       | CAT#338312, RRID: AB_2561952   |
| Anti-human CD158 (KIR2DL1/S1/S3/S5) (Clone HP-MA4)     | Biolegend       | CAT#339510, RRID: AB_2565577   |
| Anti-human IFN- $\gamma$ (Clone B27)                   | Biolegend       | CAT#506518, RRID: AB_2123321   |
| Anti-human granzyme B (Clone QA16A02)                  | Biolegend       | CAT#372204, RRID: AB_2687028   |
| Anti-human perforin (Clone dG9)                        | Biolegend       | CAT#308126, RRID: AB_2572049   |
| Anti-human TNF $\alpha$ (Clone Mab11)                  | Biolegend       | CAT#502912, RRID: AB_315264    |
| Anti-human IL-2 (Clone MQ1-17H12)                      | Biolegend       | CAT#500341, RRID: AB_2562854   |
| Anti-human HLA-E (Clone 3D12)                          | Biolegend       | CAT#342606, RRID: AB_342606    |
| Anti-human $\beta$ 2-microglobulin (B2M) (Clone 2M2)   | Biolegend       | CAT#316312, RRID: AB_10641281  |
| Anti-human HLA-DR (Clone L243)                         | Biolegend       | CAT#307618, RRID: AB_493586    |
| Anti-human TCR V $\delta$ 2 (Clone B6)                 | Biolegend       | CAT#331417, RRID: AB_2687323   |
| Anti-human CD107a (Clone H4A3)                         | Biolegend       | CAT#328641, RRID: AB_2565965   |
| Anti-human CD34 (Clone 581)                            | BD Biosciences  | CAT#555822, RRID: AB_396151    |
| Anti-human TCR V $\alpha$ 24-J $\beta$ 18 (Clone 6B11) | BD Biosciences  | CAT#552825, RRID: AB_394478    |
| Anti-human ULBP-2,5,6 (Clone 165903)                   | R&D Systems     | CAT#FAB1298A, RRID: AB_2257142 |
| Anti-human V $\beta$ 11                                | Beckman-Coulter | CAT#A66905                     |

(Continued on next page)

| <i>Continued</i>                                                      |                          |                              |
|-----------------------------------------------------------------------|--------------------------|------------------------------|
| REAGENT or RESOURCE                                                   | SOURCE                   | IDENTIFIER                   |
| Human Fc Receptor Blocking Solution (TrueStain FcX)                   | Biologend                | CAT#422302                   |
| Mouse Fc Block (anti-mouse CD16/32)                                   | BD Biosciences           | CAT#553142, RRID: AB_394657  |
| $\beta$ -2-Microglobulin Antibody (Clone BBM.1)                       | Santa Cruz Biotechnology | CAT#sc-13565                 |
| LEAF purified anti-human CD1d antibody (Clone 51.1)                   | Biologend                | CAT#350304                   |
| LEAF purified Mouse IgG2b, k isotype ctrl (Clone MG2b-57)             | Biologend                | CAT#401212                   |
| LEAF purified anti-human NKG2D antibody (Clone 1D11)                  | Biologend                | CAT#320810, RRID: AB_2133276 |
| LEAF purified anti-human DNAM-1 antibody (Clone DX11)                 | BD Biosciences           | CAT#559786, RRID: AB_397327  |
| Mouse IgG1, $\kappa$ isotype control antibody (Clone MOPC-21)         | Biologend                | CAT#400124                   |
| <b>Bacterial and virus strains</b>                                    |                          |                              |
| Lenti/iNKT-sr39TK                                                     | This paper               | N/A                          |
| Lenti/BCAR-iNKT-sr39TK                                                | This paper               | N/A                          |
| Lenti/FG                                                              | This paper               | N/A                          |
| Lenti/CD1d                                                            | This paper               | N/A                          |
| Retro/BCMA-CAR-tEGFR                                                  | This paper               | N/A                          |
| <b>Biological samples</b>                                             |                          |                              |
| Human peripheral blood mononuclear cells (PBMCs)                      | UCLA                     | N/A                          |
| Human cord blood CD34+ hematopoietic stem and progenitor cells (HSCs) | UCLA                     | N/A                          |
| Human multiple myeloma patient bone marrow samples                    | UCLA                     | N/A                          |
| G-CSF-mobilized peripheral blood units                                | CCHMC                    | CAT#M001F-GCSF-3             |
| G-CSF-mobilized leukopak                                              | HemaCare                 | CAT#M001CLPG-4-KIT           |
| Cord Blood Cryo CD34                                                  | HemaCare                 | CAT#CB34C-3                  |
| <b>Chemicals, peptides, and recombinant proteins</b>                  |                          |                              |
| Streptavidin-HRP conjugate                                            | Invitrogen               | CAT#SA10001                  |
| IFN- $\gamma$ (ELISA, standard)                                       | eBioscience              | CAT#29-8319-65               |
| TNF $\alpha$ (ELISA, standard)                                        | eBioscience              | CAT#29-8329-65               |
| IL-2 (ELISA, standard)                                                | eBioscience              | CAT#29-8029-65               |
| IL-4 (ELISA, standard)                                                | eBioscience              | CAT#39-8049-65               |
| IL-17 (ELISA, standard)                                               | eBioscience              | CAT#29-8179-65               |
| Tetramethylbenzidine (TMB)                                            | KPL                      | CAT#5120-0053                |
| Ganciclovir (GCV)                                                     | Sigma                    | CAT#ADV465749843             |
| $\alpha$ -Galactosylceramide (KRN7000)                                | Avanti Polar Lipids      | SKU#867000P-1mg              |
| Zoledronate                                                           | Sigma-Aldrich            | CAT#SML0223                  |
| Recombinant human IL-2                                                | Peptotech                | CAT#200-02                   |
| Recombinant human IL-3                                                | Peptotech                | CAT#200-03                   |
| Recombinant human IL-7                                                | Peptotech                | CAT#200-07                   |
| Recombinant human IL-15                                               | Peptotech                | CAT#200-15                   |
| Recombinant human Flt3-Ligand                                         | Peptotech                | CAT#300-19                   |
| Recombinant human SCF                                                 | Peptotech                | CAT#300-07                   |
| Recombinant human TPO                                                 | Peptotech                | CAT#300-18                   |
| Recombinant human GM-CSF                                              | Peptotech                | CAT#300-03                   |

(Continued on next page)

**Continued**

| REAGENT or RESOURCE                                         | SOURCE                   | IDENTIFIER      |
|-------------------------------------------------------------|--------------------------|-----------------|
| L-ascorbic acid 2-phosphate                                 | Sigma                    | CAT#A8960-5G    |
| B27™ Supplement (50X), serum free                           | ThermoFisher             | CAT#17504044    |
| Cas9-NLS purified protein                                   | UC Berkeley              | N/A             |
| X-VIVO 15 Serum-free Hematopoietic Cell Medium              | Lonza                    | CAT#04-418Q     |
| RPMI1640 cell culture medium                                | Corning Cellgro          | CAT#10-040-CV   |
| DMEM cell culture medium                                    | Corning Cellgro          | CAT#10-013-CV   |
| Fetal Bovine Serum (FBS)                                    | Sigma                    | CAT#F2442       |
| MACS BSA stock solution                                     | Miltenyi                 | CAT#130-091-376 |
| 30% BSA                                                     | Gemini                   | CAT#50-753-3079 |
| Penicillin-Streptomycin-Glutamine (P/S/G)                   | GIBCO                    | CAT#10378016    |
| Penicillin: streptomycin (pen:strep) solution (P/S)         | Gemini Bio-products      | CAT#400-109     |
| MEM non-essential amino acids (NEAA)                        | GIBCO                    | CAT#11140050    |
| HEPES Buffer Solution                                       | GIBCO                    | CAT#15630056    |
| Sodium Pyruvate                                             | GIBCO                    | CAT#11360070    |
| Beta-Mercaptoethanol                                        | Sigma                    | SKU#M6250       |
| Normocin                                                    | Invivogen                | CAT#ant-nr-2    |
| Fixable Viability Dye eFluor506                             | affymetrix eBioscience   | CAT#65-0866-14  |
| Cell Fixation/Permeabilization Kit                          | BD Biosciences           | CAT#554714      |
| RetroNectin recombination human fibronectin fragment, 2.5mg | Takara                   | CAT#T100B       |
| 10% neutral-buffered formalin                               | Richard-Allan Scientific | CAT#5705        |
| D-Luciferin                                                 | Caliper Life Science     | CAT#XR-1001     |
| Isoflurane                                                  | Zoetis                   | CAT#50019100    |
| Phosphate Buffered Saline (PBS) pH 7.4 (1X)                 | GIBCO                    | CAT#10010-023   |
| Formaldehyde                                                | Sigma-Aldrich            | CAT#F8775       |
| Golgistop Protein Transport Inhibitor                       | BD Biosciences           | CAT#554724      |
| Phorbol-12-myristate-13-acetate (PMA)                       | Calbiochem               | CAT#524400      |
| Ionomycin, Calcium salt, Streptomyces conglobatus           | Calbiochem               | CAT#407952      |
| <b>Critical commercial assays</b>                           |                          |                 |
| Human NK Cell Isolation Kit                                 | Miltenyi Biotec          | CAT#130-092-657 |
| Human CD34 MicroBeads Kit                                   | Miltenyi Biotec          | CAT#130-046-703 |
| Human CD14 MicroBeads Kit                                   | Miltenyi Biotec          | CAT#130-050-201 |
| Human Anti-iNKT MicroBeads                                  | Miltenyi Biotec          | CAT#130-094-842 |
| Human Anti-HLA-DR MicroBeads                                | Miltenyi Biotec          | CAT#130-046-101 |
| Fixation/Permeabilization Solution Kit                      | BD Sciences              | CAT#55474       |
| Amata™ P3 Primary Cell 4D-Nucleofector™ X Kit S             | Lonza                    | CAT#V4XP-3032   |
| Dynabeads Human T-Activator CD3/CD28                        | ThermoFisher             | CAT#111.61D     |
| miRNeasy Mini Kit                                           | QIAGEN                   | CAT#217004      |
| Chromium single cell V(D)J enrichment kit, human T cell     | 10 x Genomics            | CAT#1000005     |
| Cryostor cell cryopreservation media                        | Sigma                    | CAT#C2874-100ML |
| Human IL-17A ELISA MAX Deluxe Kit                           | Biolegend                | CAT#433915      |

(Continued on next page)

| REAGENT or RESOURCE                                         | SOURCE                       | IDENTIFIER                                                                                                                                                                                                                    |
|-------------------------------------------------------------|------------------------------|-------------------------------------------------------------------------------------------------------------------------------------------------------------------------------------------------------------------------------|
| <b>Continued</b>                                            |                              |                                                                                                                                                                                                                               |
| <b>Deposited data</b>                                       |                              |                                                                                                                                                                                                                               |
| Deep RNA sequencing                                         | This paper                   | Gene Expression Omnibus Database: GSE164425                                                                                                                                                                                   |
| Single cell TCR sequencing                                  | This paper                   | Gene Expression Omnibus Database: GSE164500                                                                                                                                                                                   |
| <b>Experimental models: Cell lines</b>                      |                              |                                                                                                                                                                                                                               |
| Human multiple myeloma (MM) cell line MM.1S                 | ATCC                         | CRL-2974                                                                                                                                                                                                                      |
| Human chronic myelogenous leukemia cancer cell line K562    | ATCC                         | CCL-243                                                                                                                                                                                                                       |
| Human melanoma cell line A375                               | ATCC                         | CRL-1619                                                                                                                                                                                                                      |
| Human adenocarcinoma cell line PC3                          | ATCC                         | CRL-1435                                                                                                                                                                                                                      |
| Human mucoepidermoid pulmonary carcinoma H292               | ATCC                         | CRL-1848                                                                                                                                                                                                                      |
| <i>Mus musculus</i> Leukemia packaging cell PG13            | ATCC                         | CRL-10686                                                                                                                                                                                                                     |
| Human multiple myeloma (MM) cell line MM.1S-FG              | This paper                   | N/A                                                                                                                                                                                                                           |
| Human multiple myeloma (MM) cell line MM.1S-CD1d-FG         | This paper                   | N/A                                                                                                                                                                                                                           |
| Human chronic myelogenous leukemia cancer cell line K562-FG | This paper                   | N/A                                                                                                                                                                                                                           |
| Human adenocarcinoma cell line PC3-FG                       | This paper                   | N/A                                                                                                                                                                                                                           |
| Human mucoepidermoid pulmonary carcinoma H292-FG            | This paper                   | N/A                                                                                                                                                                                                                           |
| Human melanoma cell line A375-FG                            | This paper                   | N/A                                                                                                                                                                                                                           |
| <i>Mus musculus</i> Leukemia packaging cell PG13-BCAR-tEGFR | This paper                   | N/A                                                                                                                                                                                                                           |
| Mouse bone marrow derived stromal cell line MS5-hDLL4       | Amelie et al., 2019          | N/A                                                                                                                                                                                                                           |
| <b>Experimental models: Organisms/strains</b>               |                              |                                                                                                                                                                                                                               |
| NOD.Cg-Prkdcscid Il2rgtm1Wjl/SzJ (NSG)                      | The Jackson Laboratory       | Stock #: 005557                                                                                                                                                                                                               |
| <b>Oligonucleotides</b>                                     |                              |                                                                                                                                                                                                                               |
| gRNA (B2M): CGCGAGCACAGCUAA GGCCA                           | Synthego                     | N/A                                                                                                                                                                                                                           |
| gRNA (CIITA): GAUUAUUGGCAUAAGC CUCCC                        | Synthego                     | N/A                                                                                                                                                                                                                           |
| <b>Recombinant DNA</b>                                      |                              |                                                                                                                                                                                                                               |
| Vector: parental lentivector pMNDW                          | N/A                          | N/A                                                                                                                                                                                                                           |
| Vector: parental retrovector pMP71                          | N/A                          | N/A                                                                                                                                                                                                                           |
| <b>Software and algorithms</b>                              |                              |                                                                                                                                                                                                                               |
| FlowJo Software                                             | FlowJo                       | <a href="https://www.flowjo.com/solutions/flowjo/downloads">https://www.flowjo.com/solutions/flowjo/downloads</a>                                                                                                             |
| Living Imaging 2.50 software                                | Xenogen/PerkinElmer          | <a href="https://www.perkinelmer.com/lab-products-and-services/resources/in-vivo-imaging-software-downloads.html">https://www.perkinelmer.com/lab-products-and-services/resources/in-vivo-imaging-software-downloads.html</a> |
| AURA imaging software                                       | Spectral Instruments Imaging | <a href="https://spectralin vivo.com/software/">https://spectralin vivo.com/software/</a>                                                                                                                                     |
| I-control 1.7 Microplate Reader Software                    | Tecan                        | <a href="https://www.selectscience.net/tecan/i-control-microplate-reader-software/81307">https://www.selectscience.net/tecan/i-control-microplate-reader-software/81307</a>                                                   |
| ImageJ                                                      | ImageJ                       | <a href="https://imagej.net/Downloads">https://imagej.net/Downloads</a>                                                                                                                                                       |

(Continued on next page)



**Continued**

| REAGENT or RESOURCE | SOURCE             | IDENTIFIER                                                                                                            |
|---------------------|--------------------|-----------------------------------------------------------------------------------------------------------------------|
| Prism 6             | Graphpad           | <a href="https://www.graphpad.com/scientific-software/prism/">https://www.graphpad.com/scientific-software/prism/</a> |
| MATLAB              | The MathWorks, Inc | <a href="https://www.mathworks.com/products/matlab.html">https://www.mathworks.com/products/matlab.html</a>           |
| R                   | R                  | <a href="http://www.R-project.org/">http://www.R-project.org/</a>                                                     |

**RESOURCE AVAILABILITY**

**Lead contact**

Further information and requests for new reagents generated in this study may be directed to, and will be fulfilled by the Lead Contact, Lili Yang ([liliyang@ucla.edu](mailto:liliyang@ucla.edu)).

**Materials availability**

All unique/stable reagents generated in this study are available from the Lead Contact with a completed Materials Transfer Agreement.

**Data and code availability**

- The genomics data generated during this study are available from the public repository Gene Expression Omnibus Database: GSE164425, GSE164500.
- All data reported in this manuscript are available from the Lead Contact without restriction
- No custom computer code was reported in this manuscript.
- Any additional information required to reanalyze the data reported in this work paper is available from the Lead Contact upon request.

**EXPERIMENTAL MODEL AND SUBJECT DETAILS**

**Mice**

NOD.Cg-Prkdc<sup>SCID</sup>Il2rg<sup>tm1Wjl</sup>/SzJ (NOD/SCID/IL-2R $\gamma^{-/-}$ , NSG) mice were maintained in the animal facilities of the University of California, Los Angeles (UCLA). 6-10 weeks old mice were used for all experiments unless otherwise indicated. All animal experiments were approved by the Institutional Animal Care and Use Committee of UCLA. All mice were bred and maintained under specific pathogen-free conditions, and all experiments were conducted in accordance with the animal care and use regulations of the Division of Laboratory Animal Medicine (DLAM) at the UCLA.

**Cell Lines**

The MS5-DLL4 murine bone marrow derived stromal cell line was obtained from Dr. Gay Crooks' lab (UCLA). Human multiple myeloma cancer cell line MM.1S, chronic myelogenous leukemia cancer cell line K562, melanoma cell line A375, lung carcinoma cell line H292, and prostate cancer cell line PC3 were purchased from the American Type Culture Collection (ATCC). MM.1S cells were cultured in R10 medium. K562 cells were cultured in C10 medium. A375, H292, and PC3 were cultured in D10 medium.

To make stable tumor cell lines overexpressing human CD1d, and/or firefly luciferase and enhanced green fluorescence protein (Fluc-EGFP) dual-reporters, the parental tumor cell lines were transduced with lentiviral vectors encoding the intended gene(s)<sup>28</sup>. 72h post lentivector transduction, cells were subjected to flow cytometry sorting to isolate gene-engineered cells for making stable cell lines. Six stable tumor cell lines were generated for this study, including MM.1S-FG, MM.1S-CD1d-FG, A375-FG, PC3-FG, H292-FG, and K562-FG.

**Human CD34<sup>+</sup> Hematopoietic Stem Cells (HSCs), Periphery Blood Mononuclear Cells (PBMCs), and Patient Bone Marrow Samples**

Cord blood cells were purchased from HemaCare. G-CSF-mobilized healthy donor peripheral blood cells were purchased from HemaCare or Cincinnati Children's Hospital Medical Center (CCHMC). Human CD34<sup>+</sup> HSCs were isolated through magnetic-activated cell sorting using ClinMACs CD34<sup>+</sup> microbeads (Miltenyi Biotech). Cells were cryopreserved in Cryostor CS10 (Sigma) using CoolCell (BioCision), and were frozen in liquid nitrogen for all experiments and long-term storage. Healthy donor human PBMCs were obtained from the UCLA/CFAR Virology Core Laboratory, without identification information under federal and state regulations. Patient bone marrow samples were collected following UCLA IRB approval (IRB#15-000062).

## Media and Reagents

$\alpha$ -Galactosylceramide ( $\alpha$ GC, KRN7000) was purchased from Avanti Polar Lipids. Recombinant human IL-2, IL-3, IL-4, IL-7, IL-15, Flt3-Ligand, Stem Cell Factor (SCF), Thrombopoietin (TPO), and Granulocyte-Macrophage Colony-Stimulating Factor (GM-CSF) were purchased from Peprotech. Ganciclovir (GCV) was purchased from Sigma.

X-VIVO 15 Serum-free Hematopoietic Cell Medium was purchased from Lonza. RPMI 1640 and DMEM cell culture medium were purchased from Corning Cellgro. Fetal bovine serum (FBS) was purchased from Sigma. Medium supplements, including Penicillin-Streptomycin-Glutamine (P/S/G), MEM non-essential amino acids (NEAA), HEPES Buffer Solution, and Sodium Pyruvate, were purchased from GIBCO. Beta-Mercaptoethanol ( $\beta$ -ME) was purchased from Sigma. Normocin was purchased from InvivoGen. Complete lymphocyte culture medium (denoted as C10 medium) was made of RPMI 1640 supplemented with FBS (10% vol/vol), P/S/G (1% vol/vol), MEM NEAA (1% vol/vol), HEPES (10 mM), Sodium Pyruvate (1 mM),  $\beta$ -ME (50 mM), and Normocin (100 mg/ml). Medium for culturing human MM.1S tumor cell line (denoted as R10 medium) was made of RPMI 1640 supplemented with FBS (10% vol/vol) and P/S/G (1% vol/vol). Adherent cell culture medium (denoted as D10 medium) was made of DMEM supplemented with FBS (10% vol/vol) and P/S/G (1% vol/vol).

## METHOD DETAILS

### Lentiviral and Retroviral Vectors

Lentiviral vectors used in this study were all constructed from a parental lentivector pMNDW as previously described<sup>28</sup>. The Lenti/iNKT-sr39TK vector was constructed by inserting into pMNDW vector a synthetic tricistronic gene encoding human iNKT TCR $\alpha$ -F2A-TCR $\beta$ -P2A-sr39TK; the Lenti/FG vector was constructed by inserting into pMNDW a synthetic bicistronic gene encoding Fluc-P2A-EGFP; the Lenti/CD1d vector was constructed by inserting into pMNDW a synthetic gene encoding human CD1d. The synthetic gene fragments were obtained from GenScript and IDT. Lentiviruses were produced using HEK293T cells, following a standard calcium precipitation protocol and an ultracentrifugation concentration protocol as previously described<sup>27,28</sup>. Lentivector titers were measured by transducing HT29 cells with serial dilutions and performing digital qPCR, following established protocols<sup>27,28</sup>.

The Retro/BCAR-tEGFR vector was constructed by inserting into the parental MP71 vector a synthetic gene encoding human BCMA scFV-41BB-CD3 $\zeta$ -P2A-tEGFR. The synthetic gene fragments were obtained from IDT. Vsv-g-pseudotyped Retro/BCAR-tEGFR retroviruses were generated by transfecting HEK293T cells following a standard calcium precipitation protocol<sup>27,28</sup>; the viruses were then used to transduce PG13 cells to generate a stable retroviral packaging cell line producing Retro/BCAR-tEGFR retroviruses (denoted as PG13-BCAR-tEGFR cell line). For retrovirus production, the PG13-BCAR-tEGFR cells were seeded at a density of  $8 \times 10^5$  cells per ml in D10 medium and cultured in a 15 cm-dish (30 mL per dish) for 2 days; virus supernatants were then harvested and stored at  $-80^\circ\text{C}$  for future use.

### Antibodies and Flow Cytometry

All flow cytometry stains were performed in PBS for 15 min at  $4^\circ\text{C}$ . The samples were stained with Fixable Viability Dye eFluor506 (e506) mixed with Mouse Fc Block (anti-mouse CD16/32) or Human Fc Receptor Blocking Solution (TrueStain FcX) prior to antibody staining. Antibody staining was performed at a dilution according to the manufacturer's instructions. Fluorochrome-conjugated antibodies specific for human CD45 (Clone H130), TCR $\alpha\beta$  (Clone I26), CD4 (Clone OKT4), CD8 (Clone SK1), CD45RO (Clone UCHL1), CD161 (Clone HP-3G10), CD69 (Clone FN50), CD56 (Clone HCD56), CD62L (Clone DREG-56), CD14 (Clone HCD14), CD11b (Clone ICRF44), CD11c (Clone N418), CD1d (Clone 51.1), CCR4 (Clone L291H4), CCR5 (Clone HEK/1/85a), CXCR3 (Clone G025H7), NKG2D (Clone 1D11), DNAM-1 (Clone 11A8), CD158 (KIR2DL1/S1/S3/S5) (Clone HP-MA4), IFN- $\gamma$  (Clone B27), granzyme B (Clone QA16A02), perforin (Clone dG9), TNF- $\alpha$  (Clone Mab11), IL-2 (Clone MQ1-17H12), HLA-E (Clone 3D12),  $\beta$ 2-microglobulin (B2M) (Clone 2M2), HLA-DR (Clone L243), TCR V $\delta$ 2 (Clone B6) were purchased from BioLegend; Fluorochrome-conjugated antibodies specific for human CD34 (Clone 581) and TCR V $\alpha$ 24-J $\beta$ 18 (Clone 6B11) were purchased from BD Biosciences; Fluorochrome-conjugated antibodies specific for human V $\beta$ 11 was purchased from Beckman-Coulter; Fluorochrome-conjugated antibodies specific for human ULBP-2,5,6 (Clone 165903) was purchased from R&D Systems. Human Fc Receptor Blocking Solution (TrueStain FcX) was purchased from BioLegend, and Mouse Fc Block (anti-mouse CD16/32) was purchased from BD Biosciences. Fixable Viability Dye e506 were purchased from Affymetrix eBioscience. Intracellular cytokines were stained using a Cell Fixation/Permeabilization Kit (BD Biosciences). Stained cells were analyzed using a MACSQuant Analyzer 10 flow cytometer (Miltenyi Biotech). FlowJo software was utilized to analyze the data.

### Enzyme-Linked Immunosorbent Cytokine Assays (ELISA)

The ELISAs for detecting human cytokines were performed following a standard protocol from BD Biosciences. Supernatants from co-culture assays were collected and assayed to quantify IFN- $\gamma$ , TNF- $\alpha$ , IL-2, IL-4, and IL-17. The capture and biotinylated pairs for detecting cytokines were purchased from BD Biosciences. The streptavidin-HRP conjugate was purchased from Invitrogen. Human cytokine standards were purchased from eBioscience. Tetramethylbenzidine (TMB) substrate was purchased from KPL. The samples were analyzed for absorbance at 450 nm using an Infinite M1000 microplate reader (Tecan).

### **In Vitro Generation of Allogeneic HSC-Engineered iNKT (<sup>Allo</sup>HSC-iNKT) Cells**

Frozen-thawed human CD34<sup>+</sup> HSCs were revived in HSC-culture medium composed of X-VIVO 15 Serum-free Hematopoietic Cell Medium supplemented with SCF (50 ng/ml), FLT3-L (50 ng/ml), TPO (50 ng/ml), and IL-3 (10 ng/ml) for 24 h; the cells were then transduced with Lenti/iNKT-sr39TK viruses for another 24 h following an established protocol<sup>28</sup>. The transduced HSCs were then collected and put into a 2-Stage *in vitro* HSC-iNKT culture.

At Stage 1, gene-engineered HSCs were differentiated into iNKT cells in an artificial thymic organoid (ATO) culture over 8 weeks. ATO was generated following a previously established protocol, with certain modifications<sup>29,30</sup>. Briefly, MS5-DLL4 cells were harvested by trypsinization and resuspended in serum free ATO culture medium ("RB27") composed of RPMI 1640 (Corning), 4% B27 supplement (ThermoFisher Scientific), 30 mM L-ascorbic acid 2-phosphate sesquimagnesium salt hydrate (Sigma-Aldrich) reconstituted in PBS, 1% penicillin/streptomycin (Gemini Bio-Products), 1% Glutamax (ThermoFisher Scientific), 5 ng/ml rhFLT3L and 5 ng/ml rhIL-7 (Pepro- tech). RB27 was made fresh weekly.  $1.5-6 \times 10^5$  MS5-DLL4 cells were combined with  $0.3-10 \times 10^4$  transduced HSCs per ATO in 1.5 mL Eppendorf tubes (up to 12 ATOs per tube) and centrifuged at 300 g for 5 min at 4°C in a swinging bucket centrifuge. Supernatants were carefully removed, and the cell pellet was resuspended in 6 mL RB27 per ATO and mixed by brief vortexing. ATOs were plated on a 0.4 mm Millicell transwell insert (EMD Millipore; Cat. PICMORG50) placed in a 6-well plate containing 1 mL RB27 per well. Medium was changed completely every 3-4 days by aspiration from around the cell insert followed by replacement with 1 mL fresh RB27/cytokines. ATO cells were harvested by adding FACS buffer (PBS/0.5% bovine serum albumin/2mM EDTA) to each well and briefly disaggregating the ATO by pipetting with a 1 mL "P1000" pipet, followed by passage through a 50 mm nylon strainer.

At Stage 2, isolated ATO cells comprising <sup>Allo</sup>HSC-iNKT cells were expanded with  $\alpha$ GC-loaded PBMCs ( $\alpha$ GC-PBMCs).  $\alpha$ GC-PBMCs were prepared by incubating  $10^7-10^8$  PBMCs in 5 mL C10 medium containing 5  $\mu$ g/ml  $\alpha$ GC for 1 h, followed by irradiation at 6,000 rads. ATO cells were mixed with irradiated  $\alpha$ GC-PBMCs at ratio 1:1, followed by culturing in C10 medium supplemented with human IL-7 (10 ng/ml) and IL-15 (10 ng/ml) for 2 weeks; cell cultures were split and fresh media/cytokines were added if needed. The Stage 2 expansion culture could be extended to 3 weeks by adding additional  $\alpha$ GC-PBMCs at ratio 1:1 at the end of week 2. At the end of Stage 2 culture, the resulting <sup>Allo</sup>HSC-iNKT cell products were collected and cryopreserved for future use.

### **In Vitro Generation of BCMA CAR-Engineered <sup>Allo</sup>HSC-iNKT (<sup>Allo</sup>BCAR-iNKT) Cells**

<sup>Allo</sup>HSC-iNKT cells were generated in the 2-Stage HSC-iNKT culture as described above, followed by an additional Stage 3 CAR engineering culture. At one week into Stage 2 culture, <sup>Allo</sup>HSC-iNKT cells were collected and stimulated with CD3/CD28 T-activator beads (ThermoFisher Scientific) in the presence of recombinant human IL-15 (10 ng/ml) and human IL-7 (10 ng/ml) for two days; the cells were then spin-infected with frozen-thawed Retro/BCAR-TEGFR retroviral supernatants supplemented with polybrene (10  $\mu$ g/ml, Sigma-Aldrich) at 660 g at 30°C for 90 min. Retronectin (Takara) could be pre-coated on plate to increase transduction efficiency. After transduction, the resulting <sup>Allo</sup>BCAR-iNKT cells were expanded for another 1-2 weeks in C10 medium supplemented with recombinant human IL-15 (10 ng/ml) and IL-7 (10 ng/ml), and then were collected and cryopreserved for future use.

### **In Vitro Generation of HLA-Ablated Universal HSC-iNKT (<sup>U</sup>HSC-iNKT) Cells**

<sup>U</sup>HSC-iNKT cells were generated following the protocol of generating <sup>Allo</sup>HSC-iNKT cells, with one additional gene-editing step. CD34<sup>+</sup> HSCs were revived in HSC-culture medium on day 1, transduced with Lenti/iNKT-sr39TK viruses on day 2, and then were electroporated with a CRISPR-Cas9/B2M-CIITA-gRNAs complex on day 3, followed by entering the 2-Stage HSC-iNKT culture to generate <sup>U</sup>HSC-iNKT cells. A small portion of engineered CD34<sup>+</sup> HSCs were cultured in HSC-culture medium for 5 days, and flow cytometry was performed to evaluate the genome-editing efficiencies.

<sup>U</sup>BCAR-iNKT cells were generated following the protocol of generating <sup>Allo</sup>BCAR-iNKT cells, with the same additional gene-editing step. CD34<sup>+</sup> HSCs were revived in HSC-culture medium on day 1, transduced with Lenti/iNKT-sr39TK viruses on day 2, and then were electroporated with a CRISPR-Cas9/B2M-CIITA-gRNAs complex on day 3, followed by entering the 3-Stage BCAR-iNKT culture to generate <sup>U</sup>BCAR-iNKT cells.

For electroporation,  $2 \times 10^5$  HSCs per condition were pelleted at 90 x g for 10 min at room temperature (RT), resuspended in 20  $\mu$ L P3 solution (Lonza), mixed with pre-aliquoted B2M and CIITA gRNAs (1  $\mu$ L of each gRNA at 100  $\mu$ M) and Cas9 (4  $\mu$ L at 6.5 mg/ml), and pulsed once at 250 V for 5 ms in an Amaxa 4D Nucleofector X Unit (Lonza). After electroporation, HSCs were rested at RT for 10 min, and then transferred to a 24-well tissue culture treated plate overnight before entering the 2-Stage HSC-iNKT or 3-Stage BCAR-iNKT culture.

If necessary, the resulting <sup>U</sup>HSC-iNKT or <sup>U</sup>BCAR-iNKT cell products collected at the end of the *in vitro* culture could be purified using Magnetic-Activate Cell Sorting (MACS) via B2M (Santa Cruz Biotechnology) and HLA-II magnetic beads labeling (Miltenyi Biotech), to enrich the HLA-I/II double negative cells in the final <sup>U</sup>HSC-iNKT or <sup>U</sup>BCAR-iNKT cell products.

### **Generation of PBMC-Derived Conventional $\alpha$ $\beta$ T, iNKT, $\gamma$ $\delta$ T, and NK Cells**

Healthy donor PBMCs were obtained from the UCLA/CFAR Virology Core Laboratory, and were used to generate the PBMC-Tc, PBMC-iNKT, PBMC- $\gamma$  $\delta$ T, and PBMC-NK cells.

To generate PBMC-Tc cells, PBMCs were stimulated with CD3/CD28 T-activator beads (ThermoFisher Scientific) and cultured in C10 medium supplemented with human IL-2 (20 ng/mL) for 2-3 weeks, following the manufacturer's instructions.

To generate PBMC-iNKT cells, PBMCs were MACS-sorted via anti-iNKT microbeads (Miltenyi Biotech) labeling to enrich iNKT cells, which were then stimulated with donor-matched irradiated  $\alpha$ GC-PBMCs at the ratio of 1:1, and cultured in C10 medium sup-

plemented with human IL-7 (10 ng/ml) and IL-15 (10 ng/ml) for 2-3 weeks. If needed, the resulting PBMC-iNKT cells could be further purified using Fluorescence-Activated Cell Sorting (FACS) via human iNKT TCR antibody (Clone 6B11; BD Biosciences) staining.

To generate PBMC- $\gamma\delta$ T cells, PBMCs were stimulated with Zoledronate (5  $\mu$ M; Sigma-Aldrich) and cultured in C10 medium supplemented with human IL-2 (20 ng/ml) for 2 weeks. If needed, the resulting PBMC- $\gamma\delta$ T cells could be further purified using FACS via human TCR V $\delta$ 2 antibody (Clone B6; Biolegend) staining or via MACS using a human TCR $\gamma/\delta$  T Cell Isolation Kit (Miltenyi Biotech).

To generate PBMC-NK cells, PBMCs were FACS-sorted via human CD56 antibody (Clone HCD56; Biolegend) labeling or MACS-sorted using a human NK Cell Isolation Kit (Miltenyi Biotech).

### Generation of BCMA CAR-Engineered PBMC T (BCAR-T) cells

Healthy donor PBMCs were stimulated with CD3/CD28 T-activator beads (ThermoFisher Scientific) in the presence of recombinant human IL-2 (30 ng/ml), following the manufacturer's instructions. On day 2, cells were spin-infected with frozen-thawed Retro/BCAR-tEGFR retroviral supernatants supplemented with polybrene (10  $\mu$ g/ml, Sigma-Aldrich) at 660 g at 30°C for 90 min. Retronectin (Takara) could be pre-coated on plate to increase transduction efficiency. The resulting BCAR-T cells were expanded for another 7-10 days, and then were cryopreserved for future use.

### Single Cell TCR Sequencing

$Allo$ HSC-iNKT (6B11<sup>+</sup>TCR $\alpha\beta$ <sup>+</sup>), PBMC-iNKT (6B11<sup>+</sup>TCR $\alpha\beta$ <sup>+</sup>), and PBMC-Tc (6B11<sup>-</sup>TCR $\alpha\beta$ <sup>+</sup>) cells were sorted using a FACSAria II flow cytometer. Sorted cells were immediately delivered to the UCLA TCGB (Technology Center for Genomics and Bioinformatics) Core to perform single cell TCR sequencing using a 10X Genomics Chromium™ Controller Single Cell Sequencing System (10X Genomics), following the manufacturer's instructions and the TCGB Core's standard protocol. Libraries were constructed using an Illumina TruSeq RNA Sample Prep Kit (Cat#FC-122-1001) and sequenced with 150 bp paired end reads (5,000 reads/cell) on an Illumina NovaSeq. The reads were mapped to the human T cell receptor reference genome (hg38) using Cell Ranger VDJ. The frequencies of the  $\alpha$  or  $\beta$  chain recombination were plotted.

### Deep RNA Sequencing (Deep RNaseq) and Data Analysis

A total of 25 cell samples were analyzed, as described in the following table:

| Sample name                                | Number of replicates (from different donors) | FACS sorting markers                                              | Description                                                                                          |
|--------------------------------------------|----------------------------------------------|-------------------------------------------------------------------|------------------------------------------------------------------------------------------------------|
| $Allo$ HSC-iNKT (from PBSC)                | 3                                            | 6B11 <sup>+</sup> TCR $\alpha\beta$ <sup>+</sup>                  | $Allo$ HSC-iNKT cells derived from G-CSF mobilized peripheral blood CD34 <sup>+</sup> HSCs           |
| $Allo$ HSC-iNKT (from CB)                  | 3                                            | 6B11 <sup>+</sup> TCR $\alpha\beta$ <sup>+</sup>                  | $Allo$ HSC-iNKT cells derived from cord blood CD34 <sup>+</sup> HSCs                                 |
| PBMC-iNKT (CD4 <sup>-</sup> )              | 3                                            | 6B11 <sup>+</sup> TCR $\alpha\beta$ <sup>+</sup> CD4 <sup>-</sup> | PBMC-iNKT cells derived from healthy donor PBMCs (CD4 <sup>-</sup> cells were analyzed)              |
| PBMC- $\alpha\beta$ Tc (CD4 <sup>-</sup> ) | 8                                            | 6B11 <sup>-</sup> TCR $\alpha\beta$ <sup>+</sup> CD4 <sup>-</sup> | PBMC- $\alpha\beta$ Tc cells derived from healthy donor PBMCs (CD4 <sup>-</sup> cells were analyzed) |
| PBMC-NK                                    | 2                                            | CD56 <sup>+</sup> TCR $\alpha\beta$ <sup>-</sup>                  | PBMC-NK cells derived from healthy donor PBMCs                                                       |
| PBMC- $\gamma\delta$ T                     | 6                                            | TCR $\gamma\delta$ <sup>+</sup> TCR $\alpha\beta$ <sup>-</sup>    | PBMC- $\gamma\delta$ T cells derived from healthy donor PBMCs                                        |

Both  $Allo$ HSC-iNKT and PBMC-iNKT cells were activated *in vitro* with  $\alpha$ GC, PBMC- $\alpha\beta$ Tc cells were stimulated with CD3/CD28 T-activator beads, and PBMC- $\gamma\delta$ T cells were stimulated with Zoledronate. Cell samples were sorted using a FACSAria II flow cytometer. Total RNAs were isolated from each cell sample using an miRNeasy Mini Kit (QIAGEN) and delivered to the UCLA TCGB Core to perform Deep RNA sequencing using an Illumina HiSeq3000, following the manufacturer's instructions and the TCGB Core's standard protocol. cDNAs were synthesized using an iScript cDNA Synthesis Kit (1708890, BioRad). Libraries were constructed using an Illumina TruSeq Stranded Total RNA Sample Prep kit and sequenced with 50 bp single end reads (20 M reads/sample) on an Illumina HiSeq3000. The reads were mapped with STAR 2.5.3a to the human genome (hg38). The counts for each gene were obtained using quantMode GeneCounts in STAR commands, and the other parameters during alignment were set to default. Data quality was checked using Illumina's proprietary software. Sequencing depth normalized counts were obtained from the differential expression analysis and were used for principal component analysis.

### $Allo$ HSC-iNKT Cell Phenotype and Functional Study

$Allo$ HSC-iNKT cells and their derivatives (i.e.,  $Allo$ BCAR-iNKT,  $U$ HSC-iNKT, and  $U$ BCAR-iNKT cells) were analyzed in comparison with PBMC-Tc, PBMC-NK, PBMC-iNKT, or/and BCAR-T cells. Phenotype of these cells was studied using flow cytometry, by analyzing



cell surface markers including co-receptors (i.e., CD4 and CD8), NK cell receptors (i.e., CD161, NKG2D, DNAM-1, and KIR), memory T cell markers (i.e., CD45RO), and inflammatory tissue/tumor homing markers (i.e., CCR4, CCR5, and CXCR3). Capacity of these cells to produce cytokines (i.e., IFN- $\gamma$ , TNF- $\alpha$ , and IL-2) and cytotoxic molecules (i.e., perforin and granzyme B) were studied using flow cytometry via intracellular staining.

Response of  $Allo$ HSC-iNKT cells to antigen stimulation was studied by culturing  $Allo$ HSC-iNKT cells *in vitro* in C10 medium for 7 days, in the presence or absence of  $\alpha$ GC (100 ng/ml). Proliferation of  $Allo$ HSC-iNKT cells was measured by cell counting and flow cytometry (identified as 6B11<sup>+</sup>TCR $\alpha\beta$ <sup>+</sup>) over time. Cytokine production was assessed by ELISA analysis of cell culture supernatants collected on day 7 (for human IFN- $\gamma$ , TNF- $\alpha$ , IL-2, IL-4, and IL-17).

### **In Vitro Tumor Cell Killing Assay**

Tumor cells ( $1 \times 10^4$  cells per well) were co-cultured with effector cells (at ratios indicated in figure legends) in Corning 96-well clear bottom black plates for 8–24 h, in C10 medium with or without the addition of  $\alpha$ GC (100 ng/ml). At the end of culture, live tumor cells were quantified by adding D-luciferin (150  $\mu$ g/ml; Caliper Life Science) to cell cultures and reading out luciferase activities using an Infinite M1000 microplate reader (Tecan).

In some experiments, 10  $\mu$ g/ml of LEAF<sup>TM</sup> purified anti-human NKG2D (Clone 1D11, Biolegend), anti-human DNAM-1 antibody (Clone 11A8, Biolegend), or LEAF<sup>TM</sup> purified mouse IgG2bk isotype control antibody (Clone MG2B-57, Biolegend) was added to co-cultures, to study NK activating receptor-mediated tumor cell killing mechanism.

All the PBMC-derived cells and HSC-derived iNKT cells were cryopreserved before use. The cells for comparison (e.g.,  $Allo$ HSC-iNKT and PBMC-NK cells in Figure 3) were cryopreserved and thawed for testing side-by-side using Mr. Frosty Freezing Container (Thermo Scientific Nalgene) following the manufacture's instructions.

### **In Vitro Mixed Lymphocyte Reaction (MLR) Assay: Studying Graft-Versus-Host (GvH) Response**

PBMCs of multiple healthy donors were irradiated at 2,500 rads and used as stimulators, to study the GvH response of  $Allo$ HSC-iNKT cells and their derivatives (i.e.,  $Allo$ BCAR-iNKT and  $U$ BCAR-iNKT cells) as responders. PBMC-Tc or BCAR-T cells were included as responder controls. Stimulators ( $5 \times 10^5$  cells/well) and responders ( $2 \times 10^4$  cells/well) were co-cultured in 96-well round bottom plates in C10 medium for 4 days; the cell culture supernatants were then collected to measure IFN- $\gamma$  production using ELISA.

### **In Vitro MLR Assay: Studying Host-Versus-Graft (HvG) Response**

PBMCs of multiple healthy donors were used as responders, to study the HvG response of  $Allo$ HSC-iNKT cells and their derivatives (i.e.,  $Allo$ BCAR-iNKT and  $U$ BCAR-iNKT cells) as stimulators (irradiated at 2,500 rads). PBMC-Tc, PBMC-iNKT or BCAR-T cells were included as stimulator controls. Stimulators ( $5 \times 10^5$  cells/well) and responders ( $2 \times 10^4$  cells/well) were co-cultured in 96-well round bottom plates in C10 medium for 4 days; the cell culture supernatants were then collected to measure IFN- $\gamma$  production using ELISA.

### **In Vitro MLR Assay: Studying NK Cell-Mediated Allorejection**

PBMC-NK cells isolated from PBMCs of multiple healthy donors were used to study the NK cell-mediated allorejection of  $Allo$ HSC-iNKT cells and their derivatives (i.e.,  $Allo$ BCAR-iNKT and  $U$ BCAR-iNKT cells). Allogeneic PBMC-Tc or PBMC-iNKT cells were included as controls. PBMC-NK cells ( $2 \times 10^4$  cells/well) and the corresponding allogeneic cells ( $2 \times 10^4$  cells/well) were co-cultured in 96-well round bottom plates in C10 medium for 24 h; the cell cultures were then collected to quantify live cells using flow cytometry.

### **Bioluminescence Live Animal Imaging (BLI)**

BLI was performed using an IVIS 100 imaging system (Xenogen/PerkinElmer) or a Spectral Advanced Molecular Imaging (AMI) HTX imaging system (Spectral Instrument Imaging). Live animal imaging was acquired 5 min after intraperitoneal (i.p.) injection of D-Luciferin (1 mg per mouse). Imaging results were analyzed using a Living Imaging 2.50 software (Xenogen/ PerkinElmer) or an AURA imaging software (Spectral Instrument Imaging).

### **$Allo$ HSC-iNKT Cell In Vivo Antitumor Efficacy Study: A375 Human Melanoma Xenograft NSG Mouse Model**

NSG mice were pre-conditioned with 100 rads of total body irradiation (day  $-1$ ), followed by subcutaneous inoculation with  $1 \times 10^6$  A375-FG cells (day 0). On day 3, the tumor-bearing experimental mice received intravenous (i.v.) injection of vehicle (PBS),  $1.2 \times 10^7$   $Allo$ HSC-iNKT cells, or  $1.2 \times 10^7$  PBMC-NK cells. Over time, tumor loads were monitored by measuring total body luminescence using BLI and by measuring tumor size using a Fisherbrand<sup>TM</sup> Traceable<sup>TM</sup> digital caliper (Thermo Fisher Scientific). The tumor size was calculated as  $W \times L$  mm<sup>2</sup>. At around week 3, mice were terminated, and solid tumors were retrieved and weighted using a PA84 precision balance (Ohaus).

### **$Allo$ BCAR-iNKT Cell In Vivo Antitumor Efficacy Study: MM.1S Human MM Xenograft NSG Mouse Model**

NSG mice were pre-conditioned with 175 rads of total body irradiation (day  $-1$ ), followed by intravenous inoculation with  $1 \times 10^6$  MM-CD1d-FGFP cells (day 0). To study antitumor efficacy under low tumor load condition, on day 3, the tumor-bearing experimental mice received i.v. injection of vehicle (PBS),  $Allo$ BCAR-iNKT cells ( $7 \times 10^6$  CAR<sup>+</sup> cells), or conventional BCAR-T cells ( $7 \times 10^6$  CAR<sup>+</sup> cells). To study antitumor efficacy under high tumor load condition, on day 15, the tumor-bearing experimental mice received i.v. in-

jection of vehicle (PBS),  $^{Allo}$ BCAR-iNKT cells ( $5 \times 10^6$  CAR<sup>+</sup> cells), or conventional BCAR-T cells ( $5 \times 10^6$  CAR<sup>+</sup> cells). Over time, experimental mice were monitored for survival, and their tumor loads were measured using BLI.

#### **<sup>U</sup>BCAR-iNKT Cell *In Vivo* Antitumor Efficacy Study: MM.1S Human MM Xenograft NSG Mouse Model**

NSG mice were pre-conditioned with 175 rads of total body irradiation (day -1), followed by intravenous inoculation with  $5 \times 10^5$  MM-CD1d-FGFP cells (day 0). On day 3 the tumor-bearing experimental mice received i.v. injection of vehicle (PBS),  $^{Allo}$ BCAR-iNKT cells ( $3 \times 10^6$  CAR<sup>+</sup> cells), or conventional BCAR-T cells ( $3 \times 10^6$  CAR<sup>+</sup> cells). Over time, experimental mice were monitored for survival, and their tumor loads were measured using BLI.

#### **Ganciclovir (GCV) *In Vitro* and *In Vivo* Killing Assay**

For GCV *in vitro* killing assay,  $^{Allo}$ HSC-iNKT cells were cultured in C10 medium in the presence of titrated amount of GCV (0-50  $\mu$ M) for 4 days; live  $^{Allo}$ HSC-iNKT cells were then counted using a hemacytometer (VWR) via Trypan Blue staining (Fisher Scientific).

GCV *in vivo* killing assay was performed using an NSG xenograft mouse model. NSG mice received i.v. injection of  $1 \times 10^7$   $^{Allo}$ HSC-iNKT cells on day 0, followed by i.p. injection of GCV for 5 consecutive days (50 mg/kg per injection per day). On day 5, mice were terminated. Multiple tissues (i.e., spleen, liver, and lung) were collected and processed for flow cytometry analysis to detect tissue-infiltrating  $^{Allo}$ HSC-iNKT cells (identified as iNKT TCR<sup>+</sup>CD45<sup>+</sup>), following established protocols.<sup>28</sup>

#### **Histological Analysis**

Tissues (i.e., heart, liver, kidney, lung, and spleen) were collected from the experimental mice, fixed in 10% Neutral Buffered Formalin for up to 36 h, then embedded in paraffin for sectioning (5  $\mu$ m thickness). Tissue sections were prepared and stained with Hematoxylin and Eosin (H&E) by the UCLA Translational Pathology Core Laboratory, following the Core's standard protocols. Stained sections were imaged using an Olympus BX51 upright microscope equipped with an Optronics Macrofire CCD camera (AU Optronics) at 20 x and 40 x magnifications. The images were analyzed using Optronics PictureFrame software (AU Optronics).

#### **Statistical Analysis**

GraphPad Prism 6 (Graphpad Software) was used for statistical data analysis. Student's two-tailed t test was used for pairwise comparisons. Ordinary 1-way ANOVA followed by Tukey's or Dunnett's multiple comparisons test was used for multiple comparisons. Log rank (Mantel-Cox) test adjusted for multiple comparisons was used for Meier survival curves analysis. Data are presented as the mean  $\pm$  SEM, unless otherwise indicated. In all figures and figure legends, "n" represents the number of samples or animals utilized in the indicated experiments. A P value of less than 0.05 was considered significant. ns, not significant; \*p < 0.05; \*\*p < 0.01; \*\*\*p < 0.001; \*\*\*\*p < 0.0001.

**Cell Reports Medicine, Volume 2**

**Supplemental information**

**Development of allogeneic HSC-engineered**

**iNKT cells for off-the-shelf cancer immunotherapy**

**Yan-Ruide Li, Yang Zhou, Yu Jeong Kim, Yanni Zhu, Feiyang Ma, Jiaji Yu, Yu-Chen Wang, Xianhui Chen, Zhe Li, Samuel Zeng, Xi Wang, Derek Lee, Josh Ku, Tasha Tsao, Christian Hardoy, Jie Huang, Donghui Cheng, Amélie Montel-Hagen, Christopher S. Seet, Gay M. Crooks, Sarah M. Larson, Joshua P. Sasine, Xiaoyan Wang, Matteo Pellegrini, Antoni Ribas, Donald B. Kohn, Owen Witte, Pin Wang, and Lili Yang**

## **Supplemental Information**

### **Development of Allogeneic HSC-Engineered iNKT cells for Off-the-Shelf Cancer Immunotherapy**

**Yan-Ruide Li, Yang Zhou Yu Jeong Kim, Yanni Zhu, Feiyang Ma, Jiaji Yu, Yu-Chen Wang, Xianhui Chen, Zhe Li, Samuel Zeng, Xi Wang, Derek Lee, Josh Ku, Tasha Tsao, Christian Hardoy, Jie Huang, Donghui Cheng, Amélie Montel-Hagen, Christopher Seet, Gay M. Crooks, Sarah M. Larson, Joshua P. Sasine, Matteo Pellegrini, Antoni Ribas, Donald B. Kohn, Owen Witte, Pin Wang, and Lili Yang**



**A**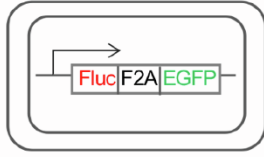

**A375-FG:** Human melanoma cell line  
**K562-FG:** Human myelogenous leukemia cell line  
**H292-FG:** Human lung cancer cell line  
**PC3-FG:** Human prostate cancer cell line  
**MM.1S-FG:** Human multiple myeloma cell line

**B**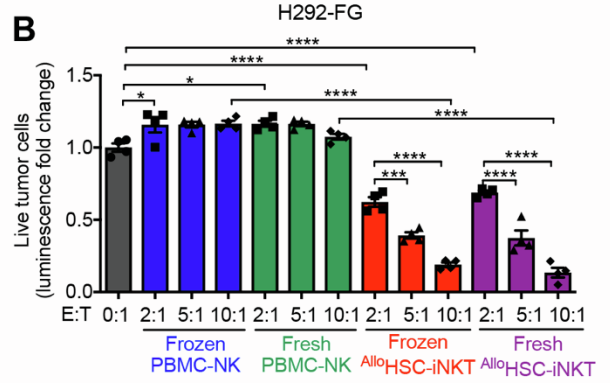**C**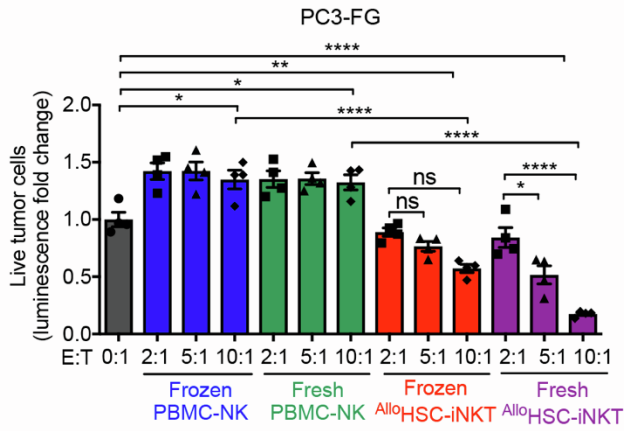**D**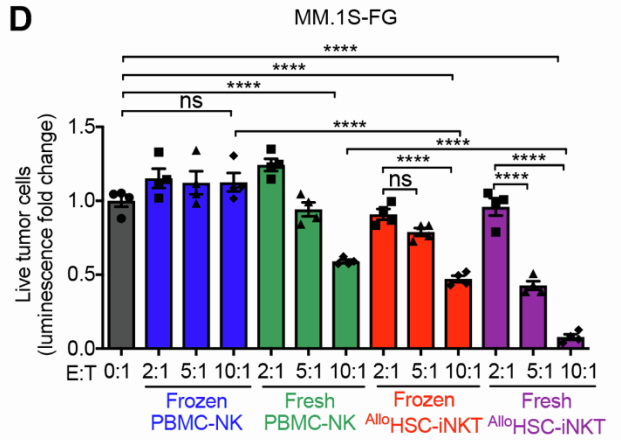**E**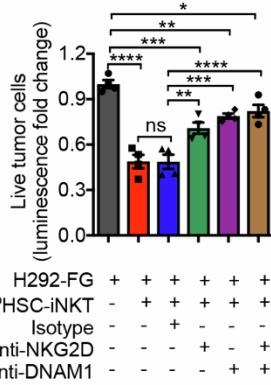**F**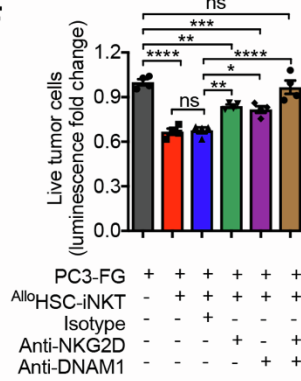**G**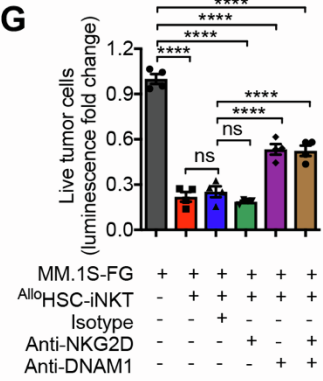**H**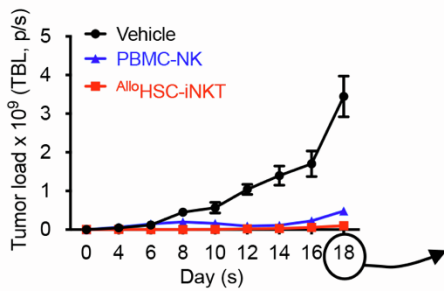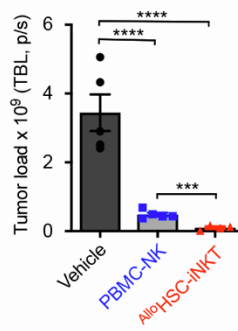**I**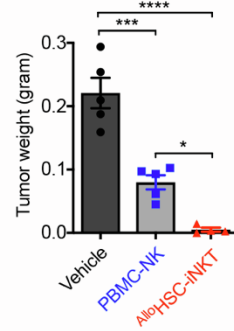

**Figure S1. Tumor Targeting of AlloHSC-iNKT Cells Through Intrinsic NK Function; Related to Figure 3.**

(A) Schematics showing the engineered A375-FG, K562-FG, H292-FG, PC3-FG, and MM.1S-FG cell lines. Fluc, firefly luciferase; EGFP, enhanced green fluorescent protein; F2A, foot-and-mouth disease virus 2A self-cleavage sequence.

(B-D) *In vitro* direct killing of human tumor cells by <sup>Allo</sup>HSC-iNKT cells. PBMC-NK cells were included as a control. Both fresh and frozen-thawed cells were studied. Tumor cell killing was analyzed at 24-hours post co-culture. Tumor killing data of H292-FG human lung cancer cells (B), PC3-FG human prostate cancer cells (C), and MM.1S-FG human multiple myeloma cells (D) were presented. N = 4. Related to main Figures 3C-3E.

(E-G) Tumor killing mechanisms of <sup>Allo</sup>HSC-iNKT cells. NKG2D and DNAM-1 mediated pathways were studied. Tumor cell killing was analyzed at 24-hours post co-culture. Tumor killing data of H292-FG (tumor:iNKT ratio 1:2), PC3-FG (tumor:iNKT ratio 1:10), and MM.1S-FG (tumor:iNKT ratio 1:15) were presented. N = 4. Related to main Figures 3F-3H.

(H-I) *In vivo* antitumor efficacy of <sup>Allo</sup>HSC-iNKT cells in an A375-FG human melanoma xenograft NSG mouse model. (H) BLI measurements of tumor loads over time (n = 4 or 5). (I) Tumor weight at the terminal harvest on day 18 (n = 4 or 5). Related to main Figures 3I-3K.

Representative of 3 experiments. Data are presented as the mean ± SEM. ns, not significant, \*P < 0.05, \*\*P < 0.01, \*\*\*P < 0.001, \*\*\*\*P < 0.0001, by 1-way ANOVA (B-G, I) or by Student's *t* test (H).

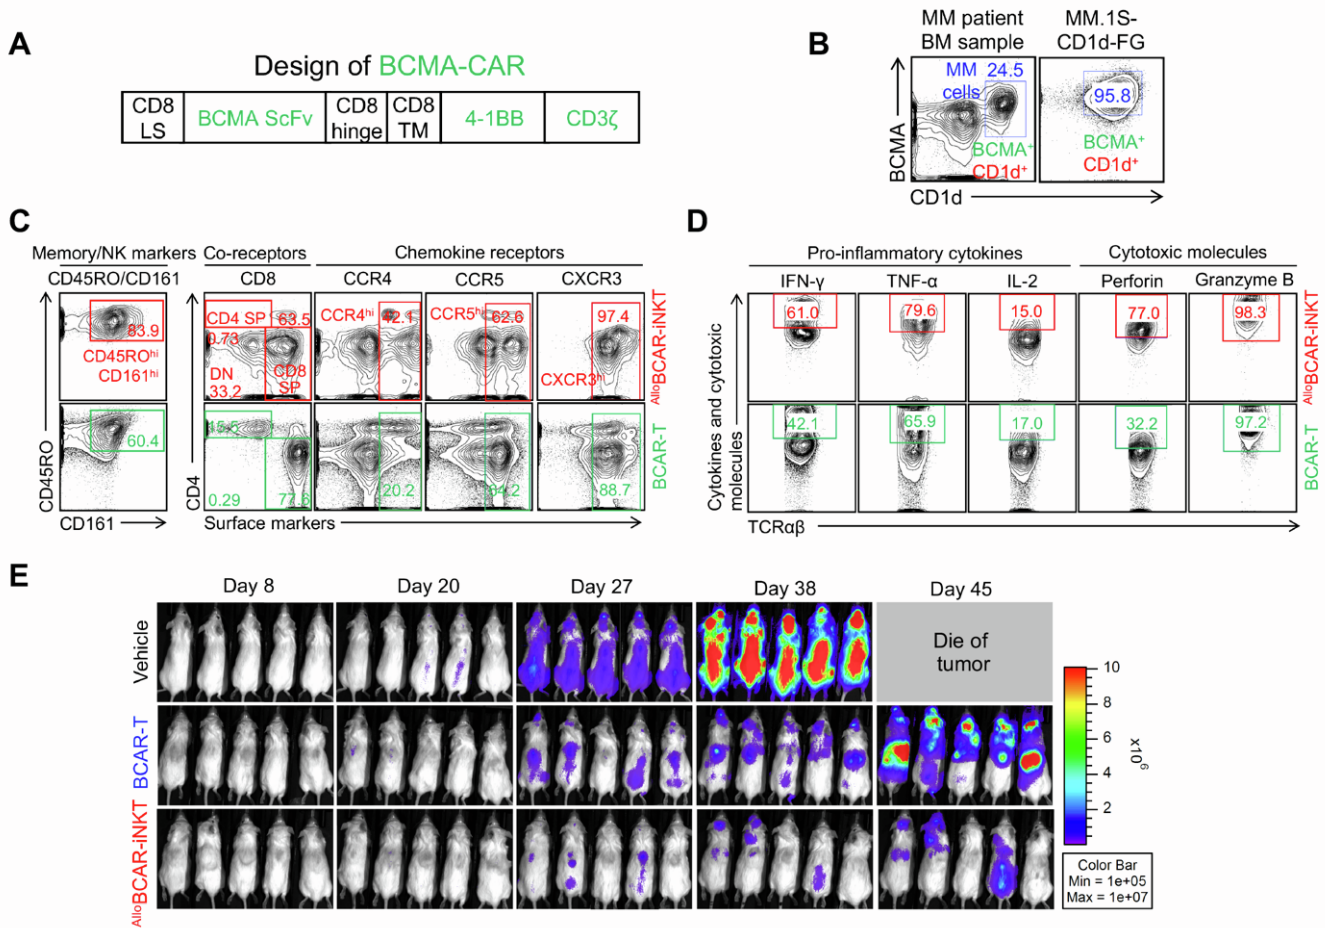

**Figure S2. Tumor Targeting of <sup>Allo</sup>HSC-iNKT Cells Through Engineered Chimeric Antigen Receptors; Related to Figure 4.**

(A) Schematics showing the design of BCMA-CAR. LS, leader sequence; ScFv, single-chain variable fragment; TM, transmembrane domain.

(B) FACS analyses of BCMA and CD1d expression on MM.1S-CD1d-FG cells. A representative MM patient primary bone marrow (BM) sample was included as a control.

(C-D) FACS characterization of <sup>Allo</sup>BCAR-iNKT cells. (C) Surface marker expression. (D) Intracellular cytokine and cytotoxic molecule production. BCAR-T cells were included as a control.

(E) *In vivo* antitumor efficacy of <sup>Allo</sup>BCAR-iNKT cells in an MM.1S-CD1d-FG human multiple myeloma xenograft NSG mouse model. BLI images were presented showing tumor loads in experimental mice over time. Related to main Figures 4K-4N.

Representative of 2 (E) and 3 (A-D) experiments.

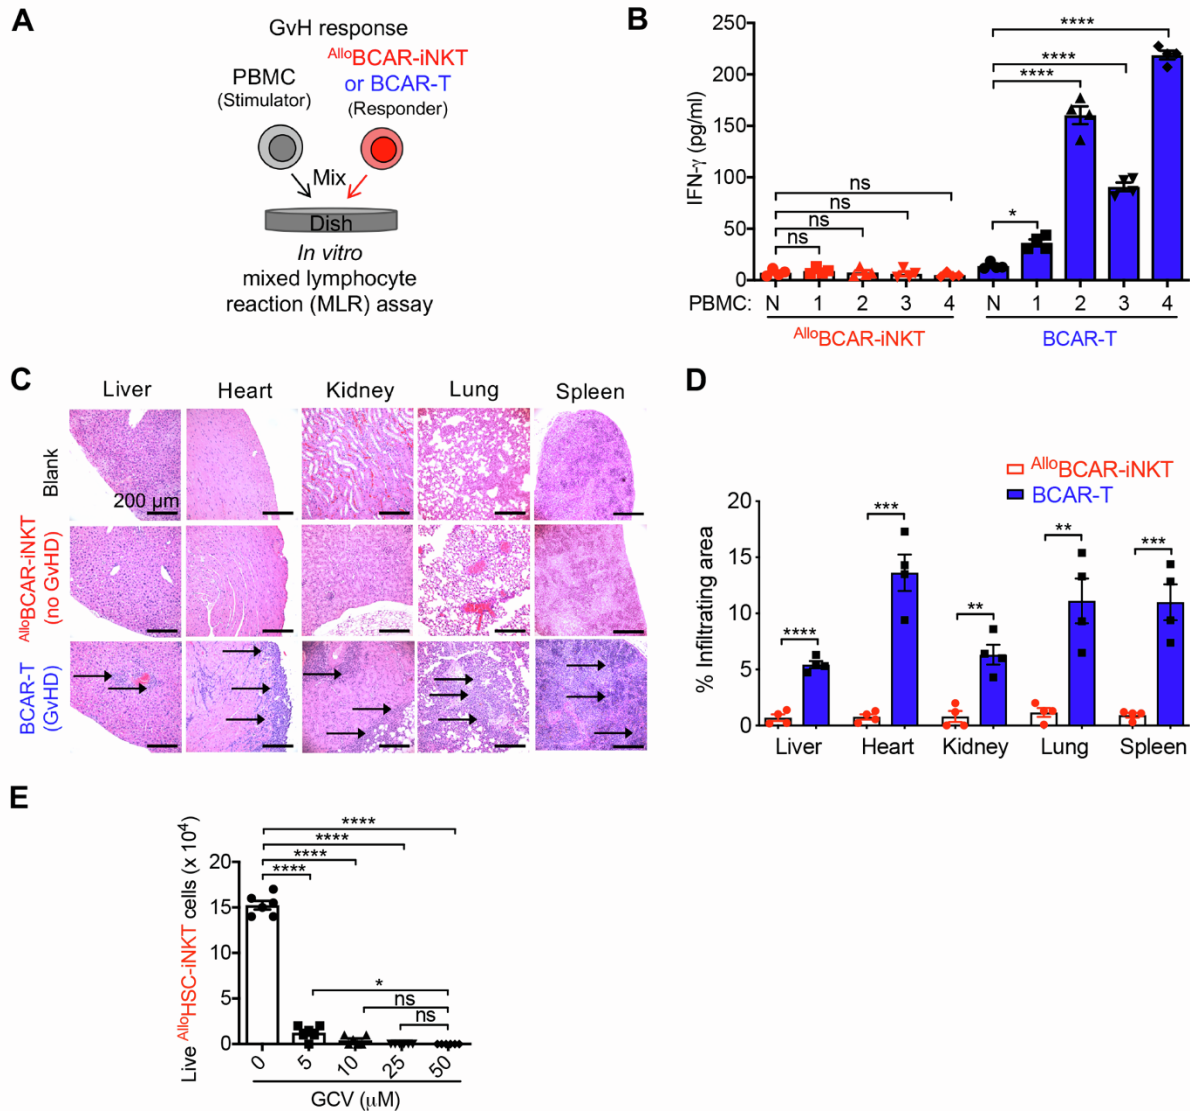

**Figure S3. Safety study of  $Allo$ HSC-iNKT cells; Related to Figure 5.**

(A-B) Studying the graft-versus-host (GvH) response of  $Allo$ BCAR-iNKT cells using an *in vitro* mixed lymphocyte reaction (MLR) assay. BCAR-T cells were included as a responder cell control. (A) Experimental design. PBMCs from 4 different healthy donors were used as stimulator cells. (B) ELISA analyses of IFN- $\gamma$  production at day 4 (n = 4).

(C-D) Histology analysis of tissue sections collected from experimental mice as described in Figures 4G-4J. (C) H&E-stained tissue sections. Blank indicates tissue sections collected from NSG mice receiving no adoptive cell transfer. Arrows point to mononuclear cell infiltrates. Scale bar: 200  $\mu$ m. (D) Quantification of C (n = 4).

(E) *In vitro* GCV killing assay.  $Allo$ HSC-iNKT cells were cultured *in vitro* in the presence of gradient concentrations of GCV for 4 days, followed by quantification of live cells via cell counting (n = 6).

Representative of 2 experiments. Data are presented as the mean  $\pm$  SEM. ns, not significant, \*P < 0.05, \*\*P < 0.01, \*\*\*P < 0.001, \*\*\*\*P < 0.0001, by Student's *t* test (D) or by 1-way ANOVA (B and E).



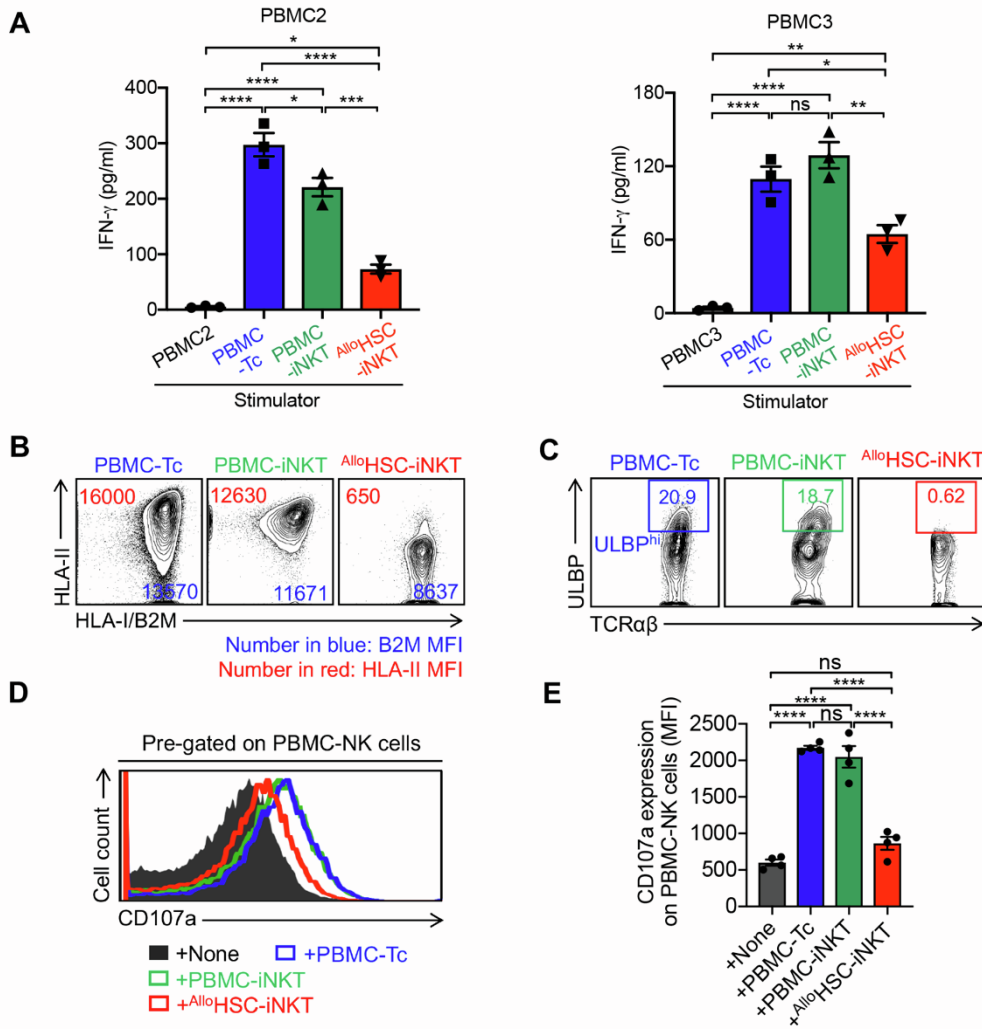

**Figure S4. Immunogenicity Study of  $AlloHSC$ -iNKT Cells; Related to Figure 6.**

(A) ELISA analyses of IFN- $\gamma$  production at day 4 in an *in vitro* MLR assay (n = 3). Data of PBMC2 and PBMC3 responders were presented. Related to main Figures 6A and 6C.

(B) FACS analyses of HLA-I/II expression on PBMC-Tc, PBMC-iNKT, and  $AlloHSC$ -iNKT cells. Representative FACS plots were presented. Related to main Figure 6B.

(C) FACS analyses of ULBP expression on PBMC-Tc, PBMC-iNKT, and  $AlloHSC$ -iNKT cells. Representative FACS plots were presented. Related to main Figure 6F.

(D-E) Studying CD107a expressions on PBMC-NK cells using an *in vitro* MLR assay. PBMC-NK cells were co-cultured with  $AlloHSC$ -iNKT, PBMC-iNKT, and PBMC-Tc cells for 24 hours. CD107a antibody was added into the cell cultures and incubated for 2 hours prior to flow cytometry. (D) FACS analyses of CD107a expression on PBMC-NK cells. (E) Quantification of D (n = 4).

Representative of 3 experiments. Data are presented as the mean  $\pm$  SEM. ns, not significant, \*P < 0.05, \*\*P < 0.01, \*\*\*P < 0.001, \*\*\*\*P < 0.0001, by one-way ANOVA.

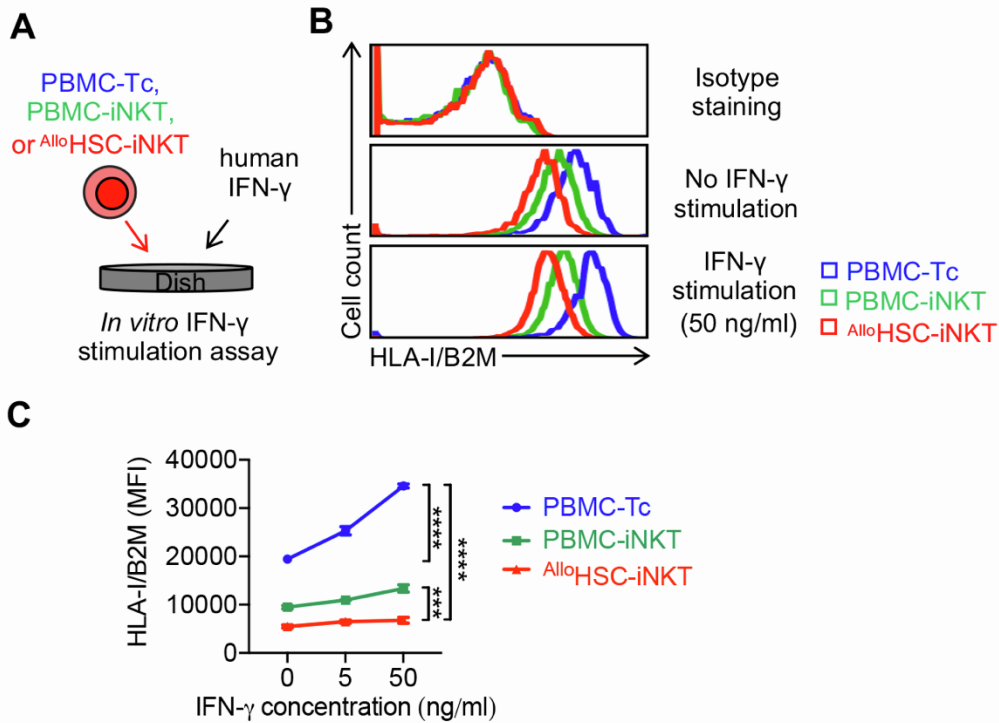

**Figure S5. HLA-I Expression Study on AlloHSC-iNKT Cells Under IFN- $\gamma$  Stimulation; Related to Figure 6.**

(A) Experimental design. AlloHSC-iNKT cells were stimulated with a range of IFN- $\gamma$  (0, 5, and 50 ng/ml) for 3 days. PBMC-iNKT and PBMC-Tc cells were included as controls.

(B) FACS analyses of HLA-I expression on the indicated cells.

(C) Quantification of HLA-I expression on the indicated cells stimulated with IFN- $\gamma$  of indicated concentrations (n = 3).

Representative of 3 experiments. Data are presented as the mean  $\pm$  SEM. \*P < 0.05, \*\*\*P < 0.001, \*\*\*\*P < 0.0001, by 1-way ANOVA.

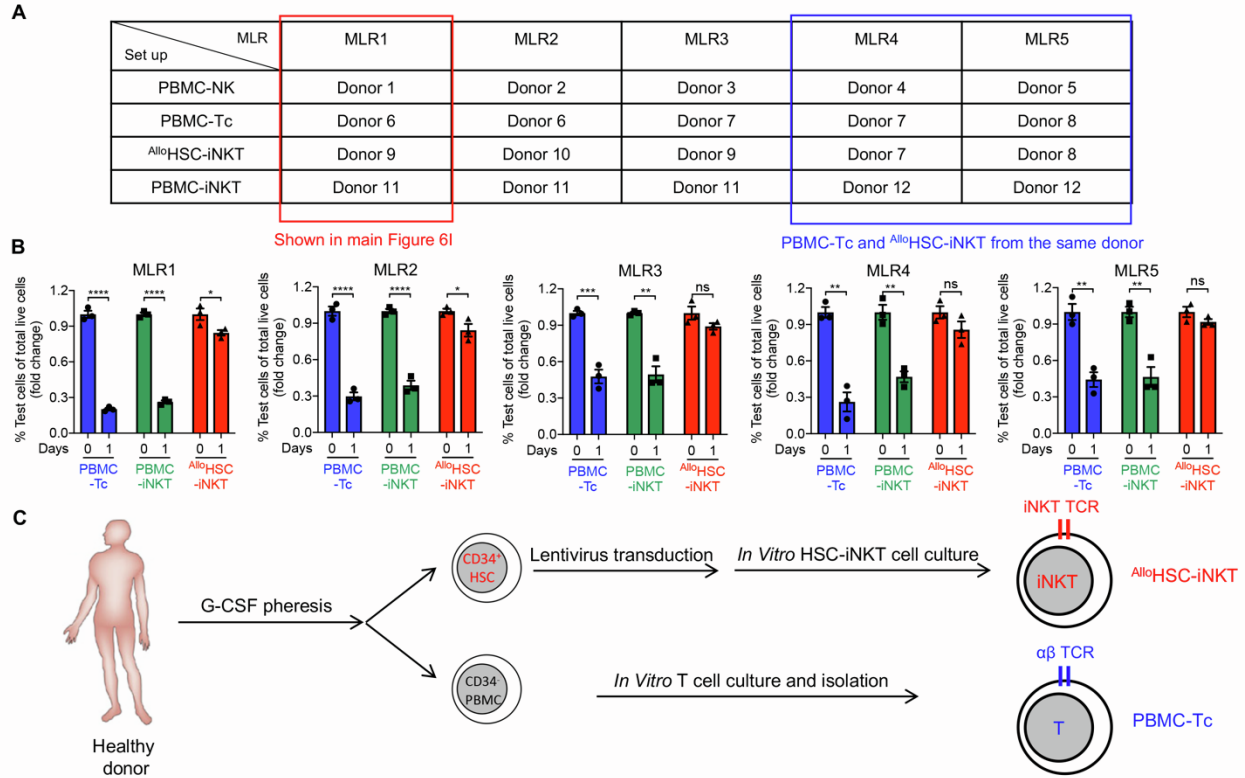

**Figure S6. Studying NK cell-mediated allorejection of AlloHSC-iNKT cells; Related to Figure 6.**

(A) Table showing the donor information of MLR assay. Five different sets of MLR assay were performed; three sets used PBMC-Tc and AlloHSC-iNKT cells from different donors, two sets used PBMC-Tc and AlloHSC-iNKT cells from the same donors. Data of MLR1 have been shown in Figure 6I.

(B) Quantification of the indicated test cells (n = 3).

(C) Diagram showing the experimental procedure to generate PBMC-Tc and AlloHSC-iNKT cells from the same donor. Data are presented as the mean  $\pm$  SEM. ns, not significant, \*P < 0.05, \*\*P < 0.01, \*\*\*P < 0.001, \*\*\*\*P < 0.0001, by Student's *t* test.

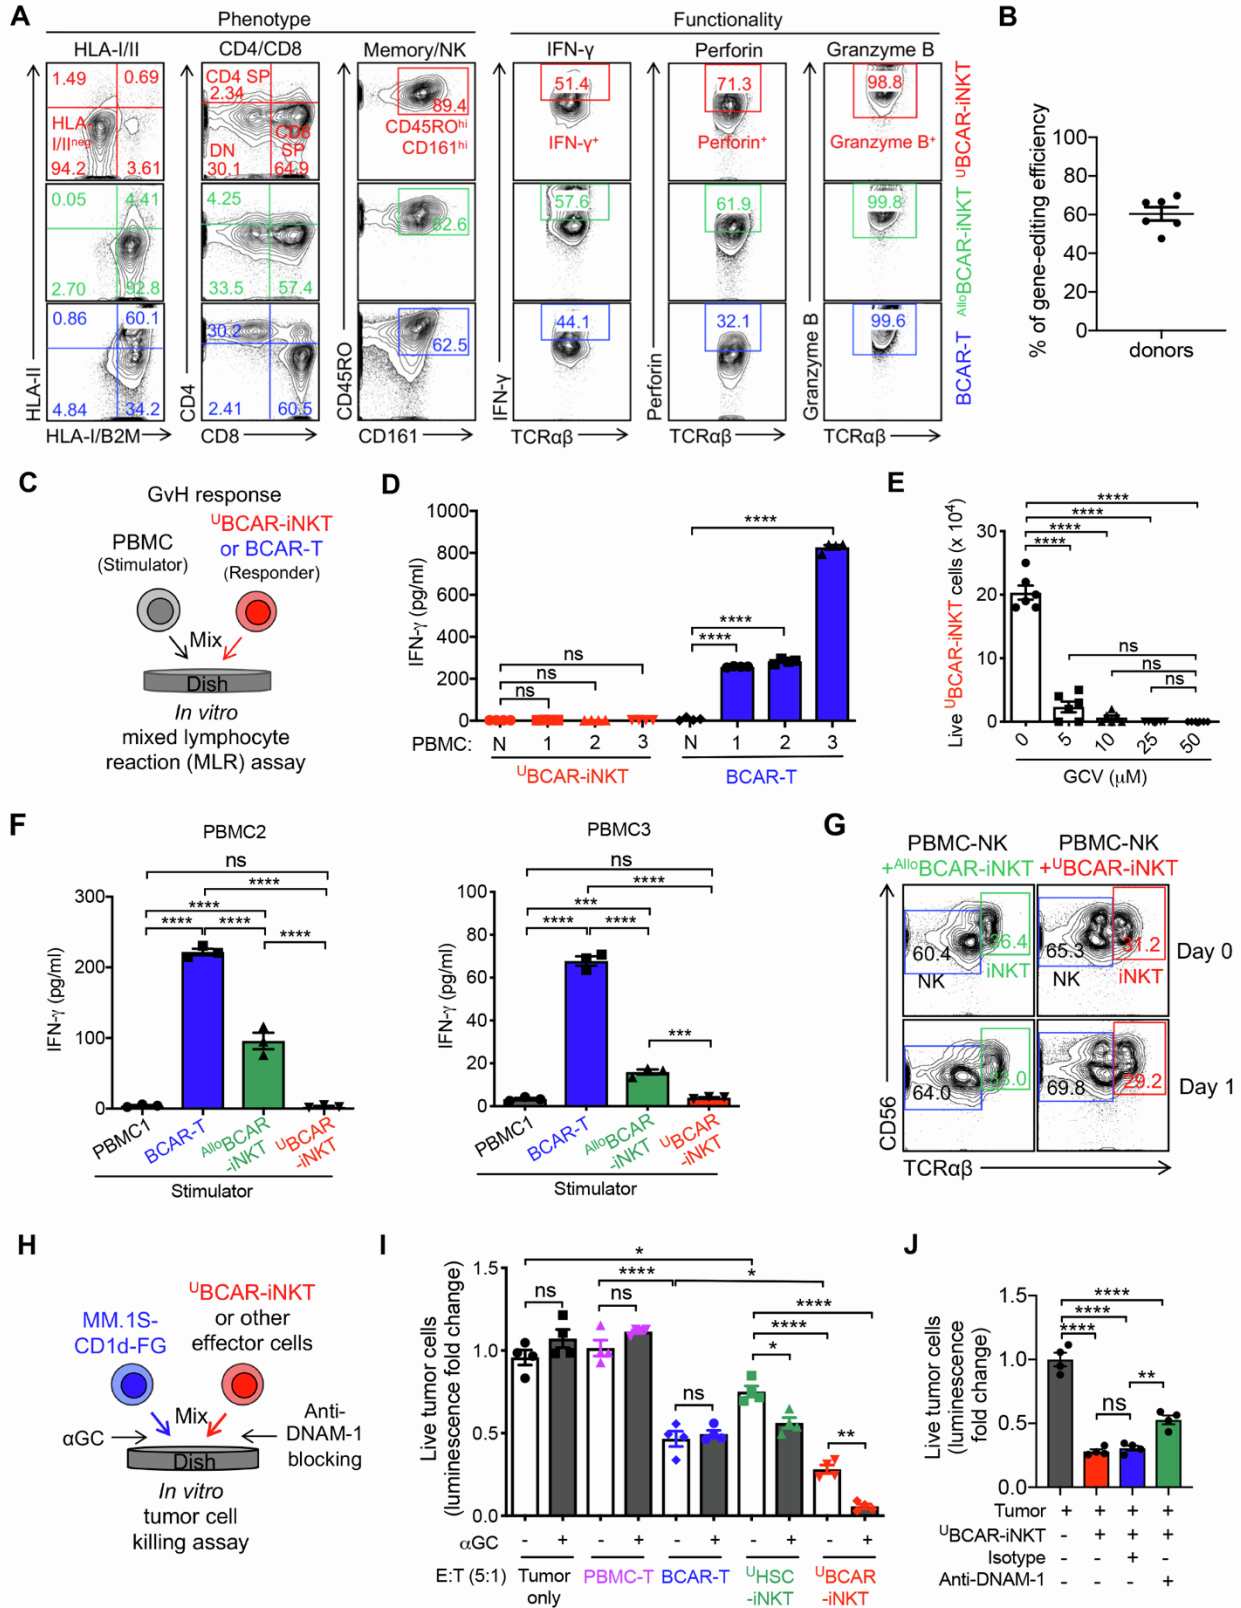

**Figure S7. Development of HLA-Ablated Universal HSC-iNKT (<sup>U</sup>HSC-iNKT) Cells and Derivatives; Related to Figure 7.**



(A) FACS analyses of surface marker expression, and Intracellular cytokine and cytotoxic molecule production by <sup>U</sup>BCAR-iNKT cells. <sup>Allo</sup>BCAR-iNKT and BCAR-T cells were included as controls.

(B) The genome editing efficiencies among multiple HSC donors.

(C-D) Studying the GvH response of <sup>U</sup>BCAR-iNKT cells using an *in vitro* MLR assay. BCAR-T cells were included as a responder cell control. (C) Experimental design. PBMCs from 3 different healthy donors were used as stimulator cells. (D) ELISA analyses of IFN- $\gamma$  production at day 4 (n = 4).

(E) *In vitro* GCV killing assay. <sup>U</sup>BCAR-iNKT cells were cultured *in vitro* in the presence of gradient concentrations of GCV for 4 days, followed by quantification of live cells via cell counting (n = 6).

(F) Studying allogenic T cell response against <sup>U</sup>BCAR-iNKT cells using an *in vitro* MLR assay. ELISA analyses of IFN- $\gamma$  production at day 4 were presented (n = 3). Related to main Figures 7E and 7F.

(G) Studying allogenic NK cell response against <sup>U</sup>BCAR-iNKT cells using an *in vitro* MLR assay. <sup>Allo</sup>BCAR-iNKT cells were included as a control. Representative FACS plots were presented, showing the quantification of the indicated cells at day 0 and day 1. Related to main Figures 7G and 7H.

(H-J) *In vitro* killing of MM.1S-CD1d-FG human multiple myeloma cells by <sup>U</sup>BCAR-iNKT cells. PBMC-T, BCAR-T, and <sup>U</sup>HSC-iNKT cells were included as effector cell controls. (H) Experimental design. (I) Tumor cell killing by the indicated effector cells with/out the addition of  $\alpha$ GC (n = 4). (J) Tumor cell killing by <sup>Allo</sup>BCAR-iNKT cells with/out the blockade of DNAM-1 (n = 4). Tumor cell killing was analyzed at 8-hours post co-culture (effector:tumor ratio 5:1).

Representative of 3 experiments. Data are presented as the mean  $\pm$  SEM. ns, not significant, \*P < 0.05, \*\*P < 0.01, \*\*\*P < 0.001, \*\*\*\*P < 0.0001, by 1-way ANOVA.
